# Supplementary material for: High-resolution infrared spectra and rovibrational analysis of the ν12 band of propylene oxide
Source: Royal Society of Chemistry journal article supplement (doi:10.1039/d4cp02943g), 2024-01-01
Supplement: d4cp02943g1.pdf [file d4cp02943g1.pdf]

SPFIT output file of propylene oxide fundamental nu12=1 band

|                                          |    |   |    |   |    |   |    | obs | o-c        | error    | blends | Notes    |      |
|------------------------------------------|----|---|----|---|----|---|----|-----|------------|----------|--------|----------|------|
|                                          |    |   |    |   |    |   |    |     |            |          | o-c    | wt       |      |
| / instead of : below denotes (o-c)>3*err |    |   |    |   |    |   |    |     |            |          |        |          |      |
| 1:                                       | 26 | 0 | 26 | 1 | 25 | 1 | 25 | 0   | 1276.78352 | -0.00681 | .00400 | -0.00693 | 0.34 |
| 2:                                       | 26 | 1 | 26 | 1 | 25 | 1 | 25 | 0   | 1276.78352 | -0.00690 | .00400 | -0.00693 | 0.16 |
| 3:                                       | 26 | 0 | 26 | 1 | 25 | 0 | 25 | 0   | 1276.78352 | -0.00695 | .00400 | -0.00693 | 0.16 |
| 4:                                       | 26 | 1 | 26 | 1 | 25 | 0 | 25 | 0   | 1276.78352 | -0.00705 | .00400 | -0.00693 | 0.34 |
| 5:                                       | 27 | 0 | 27 | 1 | 26 | 1 | 26 | 0   | 1277.19370 | -0.00660 | .00400 | -0.00668 | 0.34 |
| 6:                                       | 27 | 1 | 27 | 1 | 26 | 1 | 26 | 0   | 1277.19370 | -0.00667 | .00400 | -0.00668 | 0.16 |
| 7:                                       | 27 | 0 | 27 | 1 | 26 | 0 | 26 | 0   | 1277.19370 | -0.00670 | .00400 | -0.00668 | 0.16 |
| 8:                                       | 27 | 1 | 27 | 1 | 26 | 0 | 26 | 0   | 1277.19370 | -0.00676 | .00400 | -0.00668 | 0.34 |
| 9:                                       | 29 | 0 | 29 | 1 | 28 | 1 | 28 | 0   | 1278.01336 | -0.00821 | .00400 | -0.00825 | 0.34 |
| 10:                                      | 29 | 1 | 29 | 1 | 28 | 1 | 28 | 0   | 1278.01336 | -0.00824 | .00400 | -0.00825 | 0.16 |
| 11:                                      | 29 | 0 | 29 | 1 | 28 | 0 | 28 | 0   | 1278.01336 | -0.00825 | .00400 | -0.00825 | 0.16 |
| 12:                                      | 29 | 1 | 29 | 1 | 28 | 0 | 28 | 0   | 1278.01336 | -0.00828 | .00400 | -0.00825 | 0.34 |
| 13:                                      | 30 | 0 | 30 | 1 | 29 | 1 | 29 | 0   | 1278.42818 | -0.00469 | .00400 | -0.00471 | 0.34 |
| 14:                                      | 30 | 1 | 30 | 1 | 29 | 1 | 29 | 0   | 1278.42818 | -0.00470 | .00400 | -0.00471 | 0.16 |
| 15:                                      | 30 | 0 | 30 | 1 | 29 | 0 | 29 | 0   | 1278.42818 | -0.00471 | .00400 | -0.00471 | 0.16 |
| 16:                                      | 30 | 1 | 30 | 1 | 29 | 0 | 29 | 0   | 1278.42818 | -0.00473 | .00400 | -0.00471 | 0.34 |
| 17:                                      | 31 | 0 | 31 | 1 | 30 | 1 | 30 | 0   | 1278.84214 | -0.00246 | .00400 | -0.00247 | 0.34 |
| 18:                                      | 31 | 1 | 31 | 1 | 30 | 1 | 30 | 0   | 1278.84214 | -0.00247 | .00400 | -0.00247 | 0.16 |
| 19:                                      | 31 | 0 | 31 | 1 | 30 | 0 | 30 | 0   | 1278.84214 | -0.00247 | .00400 | -0.00247 | 0.16 |
| 20:                                      | 31 | 1 | 31 | 1 | 30 | 0 | 30 | 0   | 1278.84214 | -0.00248 | .00400 | -0.00247 | 0.34 |
| 21:                                      | 32 | 0 | 32 | 1 | 31 | 1 | 31 | 0   | 1279.25606 | -0.00070 | .00400 | -0.00071 | 0.34 |
| 22:                                      | 32 | 1 | 32 | 1 | 31 | 1 | 31 | 0   | 1279.25606 | -0.00071 | .00400 | -0.00071 | 0.16 |
| 23:                                      | 32 | 0 | 32 | 1 | 31 | 0 | 31 | 0   | 1279.25606 | -0.00071 | .00400 | -0.00071 | 0.16 |
| 24:                                      | 32 | 1 | 32 | 1 | 31 | 0 | 31 | 0   | 1279.25606 | -0.00072 | .00400 | -0.00071 | 0.34 |
| 25:                                      | 33 | 0 | 33 | 1 | 32 | 1 | 32 | 0   | 1279.67172 | 0.00236  | .00400 | 0.00236  | 0.34 |
| 26:                                      | 33 | 1 | 33 | 1 | 32 | 1 | 32 | 0   | 1279.67172 | 0.00236  | .00400 | 0.00236  | 0.16 |
| 27:                                      | 33 | 0 | 33 | 1 | 32 | 0 | 32 | 0   | 1279.67172 | 0.00236  | .00400 | 0.00236  | 0.16 |
| 28:                                      | 33 | 1 | 33 | 1 | 32 | 0 | 32 | 0   | 1279.67172 | 0.00235  | .00400 | 0.00236  | 0.34 |
| 29:                                      | 38 | 0 | 38 | 1 | 37 | 1 | 37 | 0   | 1281.74379 | 0.00511  | .00400 | 0.00511  | 0.34 |
| 30:                                      | 38 | 1 | 38 | 1 | 37 | 1 | 37 | 0   | 1281.74379 | 0.00511  | .00400 | 0.00511  | 0.16 |
| 31:                                      | 38 | 0 | 38 | 1 | 37 | 0 | 37 | 0   | 1281.74379 | 0.00511  | .00400 | 0.00511  | 0.16 |
| 32:                                      | 38 | 1 | 38 | 1 | 37 | 0 | 37 | 0   | 1281.74379 | 0.00511  | .00400 | 0.00511  | 0.34 |
| 33:                                      | 39 | 1 | 39 | 1 | 38 | 1 | 38 | 0   | 1282.15527 | 0.00149  | .00400 | 0.00149  | 0.16 |
| 34:                                      | 39 | 0 | 39 | 1 | 38 | 0 | 38 | 0   | 1282.15527 | 0.00149  | .00400 | 0.00149  | 0.16 |
| 35:                                      | 39 | 1 | 39 | 1 | 38 | 0 | 38 | 0   | 1282.15527 | 0.00149  | .00400 | 0.00149  | 0.34 |
| 36:                                      | 39 | 0 | 39 | 1 | 38 | 1 | 38 | 0   | 1282.15527 | 0.00149  | .00400 | 0.00149  | 0.34 |
| 37:                                      | 40 | 0 | 40 | 1 | 39 | 1 | 39 | 0   | 1282.57461 | 0.00532  | .00400 | 0.00532  | 0.34 |
| 38:                                      | 40 | 1 | 40 | 1 | 39 | 1 | 39 | 0   | 1282.57461 | 0.00532  | .00400 | 0.00532  | 0.16 |
| 39:                                      | 40 | 1 | 40 | 1 | 39 | 0 | 39 | 0   | 1282.57461 | 0.00532  | .00400 | 0.00532  | 0.34 |
| 40:                                      | 40 | 0 | 40 | 1 | 39 | 0 | 39 | 0   | 1282.57461 | 0.00532  | .00400 | 0.00532  | 0.16 |
| 41:                                      | 41 | 1 | 41 | 1 | 40 | 0 | 40 | 0   | 1282.98704 | 0.00184  | .00400 | 0.00184  | 0.34 |
| 42:                                      | 41 | 0 | 41 | 1 | 40 | 0 | 40 | 0   | 1282.98704 | 0.00184  | .00400 | 0.00184  | 0.16 |
| 43:                                      | 41 | 1 | 41 | 1 | 40 | 1 | 40 | 0   | 1282.98704 | 0.00184  | .00400 | 0.00184  | 0.16 |
| 44:                                      | 41 | 0 | 41 | 1 | 40 | 1 | 40 | 0   | 1282.98704 | 0.00184  | .00400 | 0.00184  | 0.34 |
| 45:                                      | 43 | 0 | 43 | 1 | 42 | 0 | 42 | 0   | 1283.82096 | 0.00277  | .00400 | 0.00277  | 0.16 |
| 46:                                      | 43 | 1 | 43 | 1 | 42 | 0 | 42 | 0   | 1283.82096 | 0.00277  | .00400 | 0.00277  | 0.34 |
| 47:                                      | 43 | 0 | 43 | 1 | 42 | 1 | 42 | 0   | 1283.82096 | 0.00277  | .00400 | 0.00277  | 0.34 |
| 48:                                      | 43 | 1 | 43 | 1 | 42 | 1 | 42 | 0   | 1283.82096 | 0.00277  | .00400 | 0.00277  | 0.16 |
| 49:                                      | 45 | 1 | 45 | 1 | 44 | 0 | 44 | 0   | 1284.65799 | 0.00526  | .00400 | 0.00526  | 0.34 |
| 50:                                      | 45 | 0 | 45 | 1 | 44 | 0 | 44 | 0   | 1284.65799 | 0.00526  | .00400 | 0.00526  | 0.16 |
| 51:                                      | 45 | 1 | 45 | 1 | 44 | 1 | 44 | 0   | 1284.65799 | 0.00526  | .00400 | 0.00526  | 0.16 |
| 52:                                      | 45 | 0 | 45 | 1 | 44 | 1 | 44 | 0   | 1284.65799 | 0.00526  | .00400 | 0.00526  | 0.34 |
| 53:                                      | 46 | 0 | 46 | 1 | 45 | 1 | 45 | 0   | 1285.07404 | 0.00347  | .00400 | 0.00348  | 0.34 |
| 54:                                      | 46 | 1 | 46 | 1 | 45 | 1 | 45 | 0   | 1285.07404 | 0.00347  | .00400 | 0.00348  | 0.16 |
| 55:                                      | 46 | 1 | 46 | 1 | 45 | 0 | 45 | 0   | 1285.07404 | 0.00347  | .00400 | 0.00348  | 0.34 |
| 56:                                      | 46 | 0 | 46 | 1 | 45 | 0 | 45 | 0   | 1285.07404 | 0.00347  | .00400 | 0.00348  | 0.16 |
| 57:                                      | 48 | 0 | 48 | 1 | 47 | 1 | 47 | 0   | 1285.91149 | 0.00414  | .00400 | 0.00414  | 0.34 |
| 58:                                      | 48 | 1 | 48 | 1 | 47 | 0 | 47 | 0   | 1285.91149 | 0.00414  | .00400 | 0.00414  | 0.34 |
| 59:                                      | 48 | 0 | 48 | 1 | 47 | 0 | 47 | 0   | 1285.91149 | 0.00414  | .00400 | 0.00414  | 0.16 |
| 60:                                      | 48 | 1 | 48 | 1 | 47 | 1 | 47 | 0   | 1285.91149 | 0.00414  | .00400 | 0.00414  | 0.16 |
| 61:                                      | 49 | 1 | 49 | 1 | 48 | 0 | 48 | 0   | 1286.32401 | -0.00228 | .00400 | -0.00228 | 0.50 |
| 62:                                      | 49 | 0 | 49 | 1 | 48 | 1 | 48 | 0   | 1286.32401 | -0.00228 | .00400 | -0.00228 | 0.50 |
| 63:                                      | 51 | 1 | 51 | 1 | 50 | 0 | 50 | 0   | 1287.16751 | 0.00228  | .00400 | 0.00228  | 0.50 |
| 64:                                      | 51 | 0 | 51 | 1 | 50 | 1 | 50 | 0   | 1287.16751 | 0.00228  | .00400 | 0.00228  | 0.50 |
| 65:                                      | 36 | 1 | 35 | 1 | 35 | 2 | 34 | 0   | 1281.06898 | -0.00887 | .00400 | -0.00896 | 0.33 |
| 66:                                      | 36 | 2 | 35 | 1 | 35 | 2 | 34 | 0   | 1281.06898 | -0.00894 | .00400 | -0.00896 | 0.17 |
| 67:                                      | 36 | 1 | 35 | 1 | 35 | 1 | 34 | 0   | 1281.06898 | -0.00897 | .00400 | -0.00896 | 0.17 |
| 68:                                      | 36 | 2 | 35 | 1 | 35 | 1 | 34 | 0   | 1281.06898 | -0.00904 | .00400 | -0.00896 | 0.33 |
| 69:                                      | 40 | 2 | 39 | 1 | 39 | 2 | 38 | 0   | 1282.73236 | -0.00156 | .00400 | -0.00157 | 0.17 |
| 70:                                      | 40 | 1 | 39 | 1 | 39 | 1 | 38 | 0   | 1282.73236 | -0.00157 | .00400 | -0.00157 | 0.17 |
| 71:                                      | 40 | 2 | 39 | 1 | 39 | 1 | 38 | 0   | 1282.73236 | -0.00158 | .00400 | -0.00157 | 0.33 |

|      |    |   |    |   |    |   |    |   |            |          |        |          |      |
|------|----|---|----|---|----|---|----|---|------------|----------|--------|----------|------|
| 72:  | 40 | 1 | 39 | 1 | 39 | 2 | 38 | 0 | 1282.73236 | -0.00155 | .00400 | -0.00157 | 0.33 |
| 73:  | 42 | 2 | 41 | 1 | 41 | 2 | 40 | 0 | 1283.56572 | 0.00136  | .00400 | 0.00136  | 0.17 |
| 74:  | 42 | 1 | 41 | 1 | 41 | 1 | 40 | 0 | 1283.56572 | 0.00135  | .00400 | 0.00136  | 0.17 |
| 75:  | 42 | 1 | 41 | 1 | 41 | 2 | 40 | 0 | 1283.56572 | 0.00136  | .00400 | 0.00136  | 0.33 |
| 76:  | 42 | 2 | 41 | 1 | 41 | 1 | 40 | 0 | 1283.56572 | 0.00135  | .00400 | 0.00136  | 0.33 |
| 77:  | 43 | 2 | 42 | 1 | 42 | 1 | 41 | 0 | 1283.97906 | -0.00112 | .00400 | -0.00112 | 0.33 |
| 78:  | 43 | 1 | 42 | 1 | 42 | 1 | 41 | 0 | 1283.97906 | -0.00112 | .00400 | -0.00112 | 0.17 |
| 79:  | 43 | 2 | 42 | 1 | 42 | 2 | 41 | 0 | 1283.97906 | -0.00112 | .00400 | -0.00112 | 0.17 |
| 80:  | 43 | 1 | 42 | 1 | 42 | 2 | 41 | 0 | 1283.97906 | -0.00111 | .00400 | -0.00112 | 0.33 |
| 81:  | 44 | 2 | 43 | 1 | 43 | 1 | 42 | 0 | 1284.39753 | 0.00115  | .00400 | 0.00115  | 0.33 |
| 82:  | 44 | 1 | 43 | 1 | 43 | 2 | 42 | 0 | 1284.39753 | 0.00115  | .00400 | 0.00115  | 0.33 |
| 83:  | 44 | 2 | 43 | 1 | 43 | 2 | 42 | 0 | 1284.39753 | 0.00115  | .00400 | 0.00115  | 0.17 |
| 84:  | 44 | 1 | 43 | 1 | 43 | 1 | 42 | 0 | 1284.39753 | 0.00115  | .00400 | 0.00115  | 0.17 |
| 85:  | 45 | 2 | 44 | 1 | 44 | 1 | 43 | 0 | 1284.80987 | -0.00310 | .00400 | -0.00310 | 0.33 |
| 86:  | 45 | 1 | 44 | 1 | 44 | 2 | 43 | 0 | 1284.80987 | -0.00309 | .00400 | -0.00310 | 0.33 |
| 87:  | 45 | 2 | 44 | 1 | 44 | 2 | 43 | 0 | 1284.80987 | -0.00310 | .00400 | -0.00310 | 0.17 |
| 88:  | 45 | 1 | 44 | 1 | 44 | 1 | 43 | 0 | 1284.80987 | -0.00310 | .00400 | -0.00310 | 0.17 |
| 89:  | 46 | 2 | 45 | 1 | 45 | 2 | 44 | 0 | 1285.22931 | -0.00062 | .00400 | -0.00062 | 0.17 |
| 90:  | 46 | 1 | 45 | 1 | 45 | 2 | 44 | 0 | 1285.22931 | -0.00062 | .00400 | -0.00062 | 0.33 |
| 91:  | 46 | 2 | 45 | 1 | 45 | 1 | 44 | 0 | 1285.22931 | -0.00062 | .00400 | -0.00062 | 0.33 |
| 92:  | 46 | 1 | 45 | 1 | 45 | 1 | 44 | 0 | 1285.22931 | -0.00062 | .00400 | -0.00062 | 0.17 |
| 93:  | 47 | 1 | 46 | 1 | 46 | 1 | 45 | 0 | 1285.64599 | -0.00128 | .00400 | -0.00129 | 0.17 |
| 94:  | 47 | 2 | 46 | 1 | 46 | 1 | 45 | 0 | 1285.64599 | -0.00129 | .00400 | -0.00129 | 0.33 |
| 95:  | 47 | 2 | 46 | 1 | 46 | 2 | 45 | 0 | 1285.64599 | -0.00128 | .00400 | -0.00129 | 0.17 |
| 96:  | 47 | 1 | 46 | 1 | 46 | 2 | 45 | 0 | 1285.64599 | -0.00128 | .00400 | -0.00129 | 0.33 |
| 97:  | 48 | 2 | 47 | 1 | 47 | 1 | 46 | 0 | 1286.06200 | -0.00299 | .00400 | -0.00299 | 0.50 |
| 98:  | 48 | 1 | 47 | 1 | 47 | 2 | 46 | 0 | 1286.06200 | -0.00299 | .00400 | -0.00299 | 0.50 |
| 99:  | 50 | 1 | 49 | 1 | 49 | 2 | 48 | 0 | 1286.90201 | 0.00051  | .00400 | 0.00051  | 0.50 |
| 100: | 50 | 2 | 49 | 1 | 49 | 1 | 48 | 0 | 1286.90201 | 0.00051  | .00400 | 0.00051  | 0.50 |
| 101: | 52 | 1 | 51 | 1 | 51 | 2 | 50 | 0 | 1287.73817 | -0.00127 | .00400 | -0.00127 | 0.50 |
| 102: | 52 | 2 | 51 | 1 | 51 | 1 | 50 | 0 | 1287.73817 | -0.00127 | .00400 | -0.00127 | 0.50 |
| 103: | 53 | 1 | 52 | 1 | 52 | 2 | 51 | 0 | 1288.15881 | -0.00012 | .00400 | -0.00012 | 0.50 |
| 104: | 53 | 2 | 52 | 1 | 52 | 1 | 51 | 0 | 1288.15881 | -0.00012 | .00400 | -0.00012 | 0.50 |
| 105: | 55 | 2 | 54 | 1 | 54 | 1 | 53 | 0 | 1288.99987 | 0.00095  | .00400 | 0.00095  | 0.50 |
| 106: | 55 | 1 | 54 | 1 | 54 | 2 | 53 | 0 | 1288.99987 | 0.00095  | .00400 | 0.00095  | 0.50 |
| 107: | 44 | 3 | 42 | 1 | 43 | 3 | 41 | 0 | 1284.55675 | -0.00294 | .00400 | -0.00296 | 0.17 |
| 108: | 44 | 2 | 42 | 1 | 43 | 2 | 41 | 0 | 1284.55675 | -0.00297 | .00400 | -0.00296 | 0.17 |
| 109: | 44 | 2 | 42 | 1 | 43 | 3 | 41 | 0 | 1284.55675 | -0.00285 | .00400 | -0.00296 | 0.33 |
| 110: | 44 | 3 | 42 | 1 | 43 | 2 | 41 | 0 | 1284.55675 | -0.00305 | .00400 | -0.00296 | 0.33 |
| 111: | 45 | 2 | 43 | 1 | 44 | 3 | 42 | 0 | 1284.97076 | -0.00451 | .00400 | -0.00457 | 0.33 |
| 112: | 45 | 3 | 43 | 1 | 44 | 3 | 42 | 0 | 1284.97076 | -0.00456 | .00400 | -0.00457 | 0.17 |
| 113: | 45 | 2 | 43 | 1 | 44 | 2 | 42 | 0 | 1284.97076 | -0.00458 | .00400 | -0.00457 | 0.17 |
| 114: | 45 | 3 | 43 | 1 | 44 | 2 | 42 | 0 | 1284.97076 | -0.00464 | .00400 | -0.00457 | 0.33 |
| 115: | 50 | 3 | 48 | 1 | 49 | 2 | 47 | 0 | 1287.05810 | -0.00112 | .00400 | -0.00112 | 0.50 |
| 116: | 50 | 2 | 48 | 1 | 49 | 3 | 47 | 0 | 1287.05810 | -0.00111 | .00400 | -0.00112 | 0.50 |
| 117: | 54 | 2 | 52 | 1 | 53 | 3 | 51 | 0 | 1288.73096 | -0.00191 | .00400 | -0.00191 | 0.50 |
| 118: | 54 | 3 | 52 | 1 | 53 | 2 | 51 | 0 | 1288.73096 | -0.00191 | .00400 | -0.00191 | 0.50 |
| 119: | 7  | 7 | 1  | 1 | 6  | 6 | 1  | 0 | 1274.20350 | 0.00118  | .00400 | 0.00118  | 0.20 |
| 120: | 7  | 7 | 0  | 1 | 6  | 6 | 1  | 0 | 1274.20350 | 0.00118  | .00400 | 0.00118  | 0.30 |
| 121: | 7  | 7 | 0  | 1 | 6  | 6 | 0  | 0 | 1274.20350 | 0.00118  | .00400 | 0.00118  | 0.20 |
| 122: | 7  | 7 | 1  | 1 | 6  | 6 | 0  | 0 | 1274.20350 | 0.00118  | .00400 | 0.00118  | 0.30 |
| 123: | 9  | 7 | 2  | 1 | 8  | 6 | 2  | 0 | 1275.04840 | -0.00326 | .00400 | -0.00326 | 0.20 |
| 124: | 9  | 7 | 3  | 1 | 8  | 6 | 2  | 0 | 1275.04840 | -0.00326 | .00400 | -0.00326 | 0.30 |
| 125: | 9  | 7 | 2  | 1 | 8  | 6 | 3  | 0 | 1275.04840 | -0.00326 | .00400 | -0.00326 | 0.30 |
| 126: | 9  | 7 | 3  | 1 | 8  | 6 | 3  | 0 | 1275.04840 | -0.00326 | .00400 | -0.00326 | 0.20 |
| 127: | 10 | 7 | 3  | 1 | 9  | 6 | 4  | 0 | 1275.47645 | -0.00022 | .00400 | -0.00022 | 0.30 |
| 128: | 10 | 7 | 3  | 1 | 9  | 6 | 3  | 0 | 1275.47645 | -0.00022 | .00400 | -0.00022 | 0.20 |
| 129: | 10 | 7 | 4  | 1 | 9  | 6 | 3  | 0 | 1275.47645 | -0.00022 | .00400 | -0.00022 | 0.30 |
| 130: | 10 | 7 | 4  | 1 | 9  | 6 | 4  | 0 | 1275.47645 | -0.00022 | .00400 | -0.00022 | 0.20 |
| 131: | 12 | 7 | 5  | 1 | 11 | 6 | 5  | 0 | 1276.32828 | 0.00117  | .00400 | 0.00117  | 0.20 |
| 132: | 12 | 7 | 6  | 1 | 11 | 6 | 6  | 0 | 1276.32828 | 0.00117  | .00400 | 0.00117  | 0.20 |
| 133: | 12 | 7 | 5  | 1 | 11 | 6 | 6  | 0 | 1276.32828 | 0.00117  | .00400 | 0.00117  | 0.30 |
| 134: | 12 | 7 | 6  | 1 | 11 | 6 | 5  | 0 | 1276.32828 | 0.00117  | .00400 | 0.00117  | 0.30 |
| 135: | 16 | 7 | 10 | 1 | 15 | 6 | 9  | 0 | 1278.02135 | -0.00578 | .00400 | -0.00584 | 0.30 |
| 136: | 16 | 7 | 9  | 1 | 15 | 6 | 9  | 0 | 1278.02135 | -0.00579 | .00400 | -0.00584 | 0.20 |
| 137: | 16 | 7 | 10 | 1 | 15 | 6 | 10 | 0 | 1278.02135 | -0.00589 | .00400 | -0.00584 | 0.20 |
| 138: | 16 | 7 | 9  | 1 | 15 | 6 | 10 | 0 | 1278.02135 | -0.00589 | .00400 | -0.00584 | 0.30 |
| 139: | 18 | 7 | 12 | 1 | 17 | 6 | 12 | 0 | 1278.87331 | -0.00199 | .00400 | -0.00177 | 0.21 |
| 140: | 18 | 7 | 11 | 1 | 17 | 6 | 11 | 0 | 1278.87331 | -0.00154 | .00400 | -0.00177 | 0.21 |
| 141: | 18 | 7 | 12 | 1 | 17 | 6 | 11 | 0 | 1278.87331 | -0.00151 | .00400 | -0.00177 | 0.29 |
| 142: | 18 | 7 | 11 | 1 | 17 | 6 | 12 | 0 | 1278.87331 | -0.00202 | .00400 | -0.00177 | 0.29 |
| 143: | 21 | 7 | 14 | 1 | 20 | 6 | 14 | 0 | 1280.14016 | 0.00081  | .00400 | -0.00070 | 0.21 |
| 144: | 21 | 7 | 15 | 1 | 20 | 6 | 14 | 0 | 1280.14016 | 0.00107  | .00400 | -0.00070 | 0.29 |
| 145: | 21 | 7 | 15 | 1 | 20 | 6 | 15 | 0 | 1280.14016 | -0.00222 | .00400 | -0.00070 | 0.21 |
| 146: | 21 | 7 | 14 | 1 | 20 | 6 | 15 | 0 | 1280.14016 | -0.00248 | .00400 | -0.00070 | 0.29 |
| 147: | 8  | 8 | 0  | 1 | 7  | 7 | 0  | 0 | 1275.39600 | -0.00030 | .00400 | -0.00030 | 0.20 |
| 148: | 8  | 8 | 0  | 1 | 7  | 7 | 1  | 0 | 1275.39600 | -0.00030 | .00400 | -0.00030 | 0.30 |
| 149: | 8  | 8 | 1  | 1 | 7  | 7 | 0  | 0 | 1275.39600 | -0.00030 | .00400 | -0.00030 | 0.30 |

|      |    |   |    |   |    |   |    |   |            |          |        |          |      |
|------|----|---|----|---|----|---|----|---|------------|----------|--------|----------|------|
| 150: | 8  | 8 | 1  | 1 | 7  | 7 | 1  | 0 | 1275.39600 | -0.00030 | .00400 | -0.00030 | 0.20 |
| 151: | 9  | 8 | 2  | 1 | 8  | 7 | 1  | 0 | 1275.82075 | -0.00042 | .00400 | -0.00042 | 0.30 |
| 152: | 9  | 8 | 1  | 1 | 8  | 7 | 2  | 0 | 1275.82075 | -0.00042 | .00400 | -0.00042 | 0.30 |
| 153: | 9  | 8 | 1  | 1 | 8  | 7 | 1  | 0 | 1275.82075 | -0.00042 | .00400 | -0.00042 | 0.20 |
| 154: | 9  | 8 | 2  | 1 | 8  | 7 | 2  | 0 | 1275.82075 | -0.00042 | .00400 | -0.00042 | 0.20 |
| 155: | 11 | 8 | 4  | 1 | 10 | 7 | 4  | 0 | 1276.67492 | 0.00319  | .00400 | 0.00319  | 0.20 |
| 156: | 11 | 8 | 4  | 1 | 10 | 7 | 3  | 0 | 1276.67492 | 0.00319  | .00400 | 0.00319  | 0.30 |
| 157: | 11 | 8 | 3  | 1 | 10 | 7 | 3  | 0 | 1276.67492 | 0.00319  | .00400 | 0.00319  | 0.20 |
| 158: | 11 | 8 | 3  | 1 | 10 | 7 | 4  | 0 | 1276.67492 | 0.00319  | .00400 | 0.00319  | 0.30 |
| 159: | 13 | 8 | 6  | 1 | 12 | 7 | 5  | 0 | 1277.52353 | 0.00044  | .00400 | 0.00044  | 0.30 |
| 160: | 13 | 8 | 5  | 1 | 12 | 7 | 5  | 0 | 1277.52353 | 0.00044  | .00400 | 0.00044  | 0.20 |
| 161: | 13 | 8 | 5  | 1 | 12 | 7 | 6  | 0 | 1277.52353 | 0.00044  | .00400 | 0.00044  | 0.30 |
| 162: | 13 | 8 | 6  | 1 | 12 | 7 | 6  | 0 | 1277.52353 | 0.00044  | .00400 | 0.00044  | 0.20 |
| 163: | 14 | 8 | 7  | 1 | 13 | 7 | 6  | 0 | 1277.94401 | -0.00493 | .00400 | -0.00493 | 0.30 |
| 164: | 14 | 8 | 6  | 1 | 13 | 7 | 6  | 0 | 1277.94401 | -0.00493 | .00400 | -0.00493 | 0.20 |
| 165: | 14 | 8 | 7  | 1 | 13 | 7 | 7  | 0 | 1277.94401 | -0.00493 | .00400 | -0.00493 | 0.20 |
| 166: | 14 | 8 | 6  | 1 | 13 | 7 | 7  | 0 | 1277.94401 | -0.00493 | .00400 | -0.00493 | 0.30 |
| 167: | 15 | 8 | 7  | 1 | 14 | 7 | 8  | 0 | 1278.37295 | -0.00187 | .00400 | -0.00187 | 0.30 |
| 168: | 15 | 8 | 8  | 1 | 14 | 7 | 8  | 0 | 1278.37295 | -0.00187 | .00400 | -0.00187 | 0.20 |
| 169: | 15 | 8 | 7  | 1 | 14 | 7 | 7  | 0 | 1278.37295 | -0.00187 | .00400 | -0.00187 | 0.20 |
| 170: | 15 | 8 | 8  | 1 | 14 | 7 | 7  | 0 | 1278.37295 | -0.00187 | .00400 | -0.00187 | 0.30 |
| 171: | 17 | 8 | 9  | 1 | 16 | 7 | 9  | 0 | 1279.22676 | 0.00036  | .00400 | 0.00036  | 0.20 |
| 172: | 17 | 8 | 10 | 1 | 16 | 7 | 10 | 0 | 1279.22676 | 0.00035  | .00400 | 0.00035  | 0.20 |
| 173: | 17 | 8 | 9  | 1 | 16 | 7 | 10 | 0 | 1279.22676 | 0.00035  | .00400 | 0.00035  | 0.30 |
| 174: | 17 | 8 | 10 | 1 | 16 | 7 | 9  | 0 | 1279.22676 | 0.00036  | .00400 | 0.00036  | 0.30 |
| 175: | 9  | 9 | 1  | 1 | 8  | 8 | 0  | 0 | 1276.59305 | 0.00409  | .00400 | 0.00409  | 0.30 |
| 176: | 9  | 9 | 0  | 1 | 8  | 8 | 1  | 0 | 1276.59305 | 0.00409  | .00400 | 0.00409  | 0.20 |
| 177: | 9  | 9 | 0  | 1 | 8  | 8 | 0  | 0 | 1276.59305 | 0.00409  | .00400 | 0.00409  | 0.20 |
| 178: | 9  | 9 | 1  | 1 | 8  | 8 | 1  | 0 | 1276.59305 | 0.00409  | .00400 | 0.00409  | 0.20 |
| 179: | 10 | 9 | 2  | 1 | 9  | 8 | 1  | 0 | 1277.01515 | 0.00099  | .00400 | 0.00099  | 0.30 |
| 180: | 10 | 9 | 1  | 1 | 9  | 8 | 2  | 0 | 1277.01515 | 0.00099  | .00400 | 0.00099  | 0.30 |
| 181: | 10 | 9 | 1  | 1 | 9  | 8 | 1  | 0 | 1277.01515 | 0.00099  | .00400 | 0.00099  | 0.20 |
| 182: | 10 | 9 | 2  | 1 | 9  | 8 | 2  | 0 | 1277.01515 | 0.00099  | .00400 | 0.00099  | 0.20 |
| 183: | 12 | 9 | 4  | 1 | 11 | 8 | 3  | 0 | 1277.86223 | -0.00319 | .00400 | -0.00319 | 0.30 |
| 184: | 12 | 9 | 3  | 1 | 11 | 8 | 3  | 0 | 1277.86223 | -0.00319 | .00400 | -0.00319 | 0.20 |
| 185: | 12 | 9 | 3  | 1 | 11 | 8 | 4  | 0 | 1277.86223 | -0.00319 | .00400 | -0.00319 | 0.30 |
| 186: | 12 | 9 | 4  | 1 | 11 | 8 | 4  | 0 | 1277.86223 | -0.00319 | .00400 | -0.00319 | 0.20 |
| 187: | 13 | 9 | 5  | 1 | 12 | 8 | 4  | 0 | 1278.29071 | -0.00070 | .00400 | -0.00070 | 0.30 |
| 188: | 13 | 9 | 5  | 1 | 12 | 8 | 5  | 0 | 1278.29071 | -0.00070 | .00400 | -0.00070 | 0.20 |
| 189: | 13 | 9 | 4  | 1 | 12 | 8 | 4  | 0 | 1278.29071 | -0.00070 | .00400 | -0.00070 | 0.20 |
| 190: | 13 | 9 | 4  | 1 | 12 | 8 | 5  | 0 | 1278.29071 | -0.00070 | .00400 | -0.00070 | 0.30 |
| 191: | 14 | 9 | 5  | 1 | 13 | 8 | 6  | 0 | 1278.71899 | 0.00140  | .00400 | 0.00140  | 0.30 |
| 192: | 14 | 9 | 6  | 1 | 13 | 8 | 6  | 0 | 1278.71899 | 0.00140  | .00400 | 0.00140  | 0.20 |
| 193: | 14 | 9 | 6  | 1 | 13 | 8 | 5  | 0 | 1278.71899 | 0.00140  | .00400 | 0.00140  | 0.30 |
| 194: | 14 | 9 | 5  | 1 | 13 | 8 | 5  | 0 | 1278.71899 | 0.00140  | .00400 | 0.00140  | 0.20 |
| 195: | 15 | 9 | 7  | 1 | 14 | 8 | 7  | 0 | 1279.14375 | -0.00017 | .00400 | -0.00017 | 0.20 |
| 196: | 15 | 9 | 6  | 1 | 14 | 8 | 6  | 0 | 1279.14375 | -0.00017 | .00400 | -0.00017 | 0.20 |
| 197: | 15 | 9 | 7  | 1 | 14 | 8 | 6  | 0 | 1279.14375 | -0.00017 | .00400 | -0.00017 | 0.30 |
| 198: | 15 | 9 | 6  | 1 | 14 | 8 | 7  | 0 | 1279.14375 | -0.00017 | .00400 | -0.00017 | 0.30 |
| 199: | 17 | 9 | 8  | 1 | 16 | 8 | 8  | 0 | 1279.99618 | -0.00068 | .00400 | -0.00068 | 0.20 |
| 200: | 17 | 9 | 9  | 1 | 16 | 8 | 9  | 0 | 1279.99618 | -0.00068 | .00400 | -0.00068 | 0.20 |
| 201: | 17 | 9 | 8  | 1 | 16 | 8 | 9  | 0 | 1279.99618 | -0.00068 | .00400 | -0.00068 | 0.30 |
| 202: | 17 | 9 | 9  | 1 | 16 | 8 | 8  | 0 | 1279.99618 | -0.00068 | .00400 | -0.00068 | 0.30 |
| 203: | 22 | 9 | 13 | 1 | 21 | 8 | 14 | 0 | 1282.12837 | 0.00031  | .00400 | 0.00031  | 0.30 |
| 204: | 22 | 9 | 14 | 1 | 21 | 8 | 13 | 0 | 1282.12837 | 0.00032  | .00400 | 0.00031  | 0.30 |
| 205: | 22 | 9 | 13 | 1 | 21 | 8 | 13 | 0 | 1282.12837 | 0.00032  | .00400 | 0.00031  | 0.20 |
| 206: | 22 | 9 | 14 | 1 | 21 | 8 | 14 | 0 | 1282.12837 | 0.00031  | .00400 | 0.00031  | 0.20 |
| 207: | 23 | 9 | 14 | 1 | 22 | 8 | 15 | 0 | 1282.55701 | 0.00345  | .00400 | 0.00346  | 0.30 |
| 208: | 23 | 9 | 15 | 1 | 22 | 8 | 14 | 0 | 1282.55701 | 0.00347  | .00400 | 0.00346  | 0.30 |
| 209: | 23 | 9 | 14 | 1 | 22 | 8 | 14 | 0 | 1282.55701 | 0.00347  | .00400 | 0.00346  | 0.20 |
| 210: | 23 | 9 | 15 | 1 | 22 | 8 | 15 | 0 | 1282.55701 | 0.00345  | .00400 | 0.00346  | 0.20 |
| 211: | 24 | 9 | 16 | 1 | 23 | 8 | 15 | 0 | 1282.97788 | -0.00070 | .00400 | -0.00072 | 0.29 |
| 212: | 24 | 9 | 15 | 1 | 23 | 8 | 16 | 0 | 1282.97788 | -0.00074 | .00400 | -0.00072 | 0.29 |
| 213: | 24 | 9 | 16 | 1 | 23 | 8 | 16 | 0 | 1282.97788 | -0.00074 | .00400 | -0.00072 | 0.21 |
| 214: | 24 | 9 | 15 | 1 | 23 | 8 | 15 | 0 | 1282.97788 | -0.00070 | .00400 | -0.00072 | 0.21 |
| 215: | 26 | 9 | 18 | 1 | 25 | 8 | 18 | 0 | 1283.82772 | 0.00066  | .00400 | 0.00073  | 0.21 |
| 216: | 26 | 9 | 17 | 1 | 25 | 8 | 18 | 0 | 1283.82772 | 0.00065  | .00400 | 0.00073  | 0.29 |
| 217: | 26 | 9 | 17 | 1 | 25 | 8 | 17 | 0 | 1283.82772 | 0.00080  | .00400 | 0.00073  | 0.21 |
| 218: | 26 | 9 | 18 | 1 | 25 | 8 | 17 | 0 | 1283.82772 | 0.00081  | .00400 | 0.00073  | 0.29 |
| 219: | 27 | 9 | 19 | 1 | 26 | 8 | 18 | 0 | 1284.25155 | 0.00159  | .00400 | 0.00144  | 0.29 |
| 220: | 27 | 9 | 18 | 1 | 26 | 8 | 18 | 0 | 1284.25155 | 0.00157  | .00400 | 0.00144  | 0.21 |
| 221: | 27 | 9 | 18 | 1 | 26 | 8 | 19 | 0 | 1284.25155 | 0.00129  | .00400 | 0.00144  | 0.29 |
| 222: | 27 | 9 | 19 | 1 | 26 | 8 | 19 | 0 | 1284.25155 | 0.00131  | .00400 | 0.00144  | 0.21 |
| 223: | 28 | 9 | 19 | 1 | 27 | 8 | 19 | 0 | 1284.67006 | -0.00205 | .00400 | -0.00228 | 0.21 |
| 224: | 28 | 9 | 20 | 1 | 27 | 8 | 19 | 0 | 1284.67006 | -0.00201 | .00400 | -0.00228 | 0.29 |
| 225: | 28 | 9 | 19 | 1 | 27 | 8 | 20 | 0 | 1284.67006 | -0.00256 | .00400 | -0.00228 | 0.29 |
| 226: | 28 | 9 | 20 | 1 | 27 | 8 | 20 | 0 | 1284.67006 | -0.00252 | .00400 | -0.00228 | 0.21 |
| 227: | 29 | 9 | 20 | 1 | 28 | 8 | 20 | 0 | 1285.09734 | 0.00419  | .00400 | 0.00377  | 0.21 |

|      |    |    |    |   |    |   |    |   |            |          |        |          |      |
|------|----|----|----|---|----|---|----|---|------------|----------|--------|----------|------|
| 228: | 29 | 9  | 21 | 1 | 28 | 8 | 20 | 0 | 1285.09734 | 0.00426  | .00400 | 0.00377  | 0.29 |
| 229: | 29 | 9  | 21 | 1 | 28 | 8 | 21 | 0 | 1285.09734 | 0.00336  | .00400 | 0.00377  | 0.21 |
| 230: | 29 | 9  | 20 | 1 | 28 | 8 | 21 | 0 | 1285.09734 | 0.00328  | .00400 | 0.00377  | 0.29 |
| 231: | 30 | 9  | 21 | 1 | 29 | 8 | 21 | 0 | 1285.51570 | 0.00279  | .00400 | 0.00208  | 0.21 |
| 232: | 30 | 9  | 22 | 1 | 29 | 8 | 21 | 0 | 1285.51570 | 0.00293  | .00400 | 0.00208  | 0.29 |
| 233: | 30 | 9  | 22 | 1 | 29 | 8 | 22 | 0 | 1285.51570 | 0.00136  | .00400 | 0.00208  | 0.21 |
| 234: | 30 | 9  | 21 | 1 | 29 | 8 | 22 | 0 | 1285.51570 | 0.00122  | .00400 | 0.00208  | 0.29 |
| 235: | 31 | 9  | 23 | 1 | 30 | 8 | 22 | 0 | 1285.93240 | 0.00151  | .00400 | 0.00005  | 0.29 |
| 236: | 31 | 9  | 22 | 1 | 30 | 8 | 22 | 0 | 1285.93240 | 0.00126  | .00400 | 0.00005  | 0.21 |
| 237: | 31 | 9  | 22 | 1 | 30 | 8 | 23 | 0 | 1285.93240 | -0.00140 | .00400 | 0.00005  | 0.29 |
| 238: | 31 | 9  | 23 | 1 | 30 | 8 | 23 | 0 | 1285.93240 | -0.00115 | .00400 | 0.00005  | 0.21 |
| 239: | 32 | 9  | 24 | 1 | 31 | 8 | 23 | 0 | 1286.34680 | -0.00032 | .00400 | -0.00051 | 0.57 |
| 240: | 32 | 9  | 23 | 1 | 31 | 8 | 23 | 0 | 1286.34680 | -0.00076 | .00400 | -0.00051 | 0.42 |
| 241: | 32 | 9  | 23 | 1 | 31 | 8 | 24 | 0 | 1286.35264 | 0.00065  | .00400 | 0.00084  | 0.57 |
| 242: | 32 | 9  | 24 | 1 | 31 | 8 | 24 | 0 | 1286.35264 | 0.00109  | .00400 | 0.00084  | 0.42 |
| 243: | 33 | 9  | 24 | 1 | 32 | 8 | 24 | 0 | 1286.76272 | 0.00092  | .00400 | 0.00135  | 0.43 |
| 244: | 33 | 9  | 25 | 1 | 32 | 8 | 24 | 0 | 1286.76272 | 0.00168  | .00400 | 0.00135  | 0.57 |
| 245: | 33 | 9  | 24 | 1 | 32 | 8 | 25 | 0 | 1286.77152 | 0.00251  | .00400 | 0.00283  | 0.57 |
| 246: | 33 | 9  | 25 | 1 | 32 | 8 | 25 | 0 | 1286.77152 | 0.00326  | .00400 | 0.00283  | 0.43 |
| 247: | 10 | 10 | 0  | 1 | 9  | 9 | 0  | 0 | 1277.78130 | 0.00105  | .00400 | 0.00105  | 0.20 |
| 248: | 10 | 10 | 1  | 1 | 9  | 9 | 0  | 0 | 1277.78130 | 0.00105  | .00400 | 0.00105  | 0.30 |
| 249: | 10 | 10 | 1  | 1 | 9  | 9 | 1  | 0 | 1277.78130 | 0.00105  | .00400 | 0.00105  | 0.20 |
| 250: | 10 | 10 | 0  | 1 | 9  | 9 | 1  | 0 | 1277.78130 | 0.00105  | .00400 | 0.00105  | 0.30 |
| 251: | 16 | 10 | 6  | 1 | 15 | 9 | 7  | 0 | 1280.33880 | 0.00142  | .00400 | 0.00142  | 0.30 |
| 252: | 16 | 10 | 6  | 1 | 15 | 9 | 6  | 0 | 1280.33880 | 0.00142  | .00400 | 0.00142  | 0.20 |
| 253: | 16 | 10 | 7  | 1 | 15 | 9 | 7  | 0 | 1280.33880 | 0.00142  | .00400 | 0.00142  | 0.20 |
| 254: | 16 | 10 | 7  | 1 | 15 | 9 | 6  | 0 | 1280.33880 | 0.00142  | .00400 | 0.00142  | 0.30 |
| 255: | 17 | 10 | 8  | 1 | 16 | 9 | 8  | 0 | 1280.76156 | -0.00273 | .00400 | -0.00273 | 0.20 |
| 256: | 17 | 10 | 8  | 1 | 16 | 9 | 7  | 0 | 1280.76156 | -0.00273 | .00400 | -0.00273 | 0.30 |
| 257: | 17 | 10 | 7  | 1 | 16 | 9 | 8  | 0 | 1280.76156 | -0.00273 | .00400 | -0.00273 | 0.30 |
| 258: | 17 | 10 | 7  | 1 | 16 | 9 | 7  | 0 | 1280.76156 | -0.00273 | .00400 | -0.00273 | 0.20 |
| 259: | 23 | 10 | 13 | 1 | 22 | 9 | 14 | 0 | 1283.33140 | 0.00488  | .00400 | 0.00488  | 0.30 |
| 260: | 23 | 10 | 14 | 1 | 22 | 9 | 14 | 0 | 1283.33140 | 0.00488  | .00400 | 0.00488  | 0.20 |
| 261: | 23 | 10 | 14 | 1 | 22 | 9 | 13 | 0 | 1283.33140 | 0.00488  | .00400 | 0.00488  | 0.30 |
| 262: | 23 | 10 | 13 | 1 | 22 | 9 | 13 | 0 | 1283.33140 | 0.00488  | .00400 | 0.00488  | 0.20 |
| 263: | 24 | 10 | 15 | 1 | 23 | 9 | 14 | 0 | 1283.75101 | -0.00221 | .00400 | -0.00221 | 0.30 |
| 264: | 24 | 10 | 14 | 1 | 23 | 9 | 14 | 0 | 1283.75101 | -0.00221 | .00400 | -0.00221 | 0.20 |
| 265: | 24 | 10 | 15 | 1 | 23 | 9 | 15 | 0 | 1283.75101 | -0.00221 | .00400 | -0.00221 | 0.20 |
| 266: | 24 | 10 | 14 | 1 | 23 | 9 | 15 | 0 | 1283.75101 | -0.00221 | .00400 | -0.00221 | 0.30 |
| 267: | 25 | 10 | 15 | 1 | 24 | 9 | 16 | 0 | 1284.17995 | 0.00027  | .00400 | 0.00028  | 0.30 |
| 268: | 25 | 10 | 16 | 1 | 24 | 9 | 16 | 0 | 1284.17995 | 0.00027  | .00400 | 0.00028  | 0.20 |
| 269: | 25 | 10 | 16 | 1 | 24 | 9 | 15 | 0 | 1284.17995 | 0.00028  | .00400 | 0.00028  | 0.30 |
| 270: | 25 | 10 | 15 | 1 | 24 | 9 | 15 | 0 | 1284.17995 | 0.00028  | .00400 | 0.00028  | 0.20 |
| 271: | 26 | 10 | 17 | 1 | 25 | 9 | 16 | 0 | 1284.60838 | 0.00258  | .00400 | 0.00258  | 0.29 |
| 272: | 26 | 10 | 16 | 1 | 25 | 9 | 16 | 0 | 1284.60838 | 0.00258  | .00400 | 0.00258  | 0.20 |
| 273: | 26 | 10 | 17 | 1 | 25 | 9 | 17 | 0 | 1284.60838 | 0.00257  | .00400 | 0.00258  | 0.20 |
| 274: | 26 | 10 | 16 | 1 | 25 | 9 | 17 | 0 | 1284.60838 | 0.00257  | .00400 | 0.00258  | 0.29 |
| 275: | 27 | 10 | 17 | 1 | 26 | 9 | 17 | 0 | 1285.03280 | 0.00126  | .00400 | 0.00126  | 0.21 |
| 276: | 27 | 10 | 18 | 1 | 26 | 9 | 17 | 0 | 1285.03280 | 0.00126  | .00400 | 0.00126  | 0.29 |
| 277: | 27 | 10 | 17 | 1 | 26 | 9 | 18 | 0 | 1285.03280 | 0.00125  | .00400 | 0.00126  | 0.29 |
| 278: | 27 | 10 | 18 | 1 | 26 | 9 | 18 | 0 | 1285.03280 | 0.00125  | .00400 | 0.00126  | 0.21 |
| 279: | 28 | 10 | 18 | 1 | 27 | 9 | 19 | 0 | 1285.45827 | 0.00145  | .00400 | 0.00146  | 0.29 |
| 280: | 28 | 10 | 19 | 1 | 27 | 9 | 19 | 0 | 1285.45827 | 0.00145  | .00400 | 0.00146  | 0.21 |
| 281: | 28 | 10 | 18 | 1 | 27 | 9 | 18 | 0 | 1285.45827 | 0.00147  | .00400 | 0.00146  | 0.21 |
| 282: | 28 | 10 | 19 | 1 | 27 | 9 | 18 | 0 | 1285.45827 | 0.00147  | .00400 | 0.00146  | 0.29 |
| 283: | 29 | 10 | 20 | 1 | 28 | 9 | 20 | 0 | 1285.88187 | 0.00034  | .00400 | 0.00035  | 0.21 |
| 284: | 29 | 10 | 19 | 1 | 28 | 9 | 19 | 0 | 1285.88187 | 0.00037  | .00400 | 0.00035  | 0.21 |
| 285: | 29 | 10 | 20 | 1 | 28 | 9 | 19 | 0 | 1285.88187 | 0.00038  | .00400 | 0.00035  | 0.29 |
| 286: | 29 | 10 | 19 | 1 | 28 | 9 | 20 | 0 | 1285.88187 | 0.00033  | .00400 | 0.00035  | 0.29 |
| 287: | 30 | 10 | 20 | 1 | 29 | 9 | 21 | 0 | 1286.30563 | 0.00001  | .00400 | 0.00005  | 0.29 |
| 288: | 30 | 10 | 20 | 1 | 29 | 9 | 20 | 0 | 1286.30563 | 0.00009  | .00400 | 0.00005  | 0.21 |
| 289: | 30 | 10 | 21 | 1 | 29 | 9 | 20 | 0 | 1286.30563 | 0.00010  | .00400 | 0.00005  | 0.29 |
| 290: | 30 | 10 | 21 | 1 | 29 | 9 | 21 | 0 | 1286.30563 | 0.00002  | .00400 | 0.00005  | 0.21 |
| 291: | 31 | 10 | 21 | 1 | 30 | 9 | 22 | 0 | 1286.72929 | 0.00032  | .00400 | 0.00040  | 0.29 |
| 292: | 31 | 10 | 22 | 1 | 30 | 9 | 22 | 0 | 1286.72929 | 0.00033  | .00400 | 0.00040  | 0.21 |
| 293: | 31 | 10 | 21 | 1 | 30 | 9 | 21 | 0 | 1286.72929 | 0.00046  | .00400 | 0.00040  | 0.21 |
| 294: | 31 | 10 | 22 | 1 | 30 | 9 | 21 | 0 | 1286.72929 | 0.00047  | .00400 | 0.00040  | 0.29 |
| 295: | 32 | 10 | 22 | 1 | 31 | 9 | 22 | 0 | 1287.15109 | -0.00015 | .00400 | -0.00027 | 0.21 |
| 296: | 32 | 10 | 23 | 1 | 31 | 9 | 23 | 0 | 1287.15109 | -0.00039 | .00400 | -0.00027 | 0.21 |
| 297: | 32 | 10 | 23 | 1 | 31 | 9 | 22 | 0 | 1287.15109 | -0.00013 | .00400 | -0.00027 | 0.29 |
| 298: | 32 | 10 | 22 | 1 | 31 | 9 | 23 | 0 | 1287.15109 | -0.00041 | .00400 | -0.00027 | 0.29 |
| 299: | 33 | 10 | 23 | 1 | 32 | 9 | 24 | 0 | 1287.57384 | 0.00073  | .00400 | 0.00098  | 0.29 |
| 300: | 33 | 10 | 24 | 1 | 32 | 9 | 23 | 0 | 1287.57384 | 0.00123  | .00400 | 0.00098  | 0.29 |
| 301: | 33 | 10 | 23 | 1 | 32 | 9 | 23 | 0 | 1287.57384 | 0.00119  | .00400 | 0.00098  | 0.21 |
| 302: | 33 | 10 | 24 | 1 | 32 | 9 | 24 | 0 | 1287.57384 | 0.00077  | .00400 | 0.00098  | 0.21 |
| 303: | 35 | 10 | 26 | 1 | 34 | 9 | 25 | 0 | 1288.40803 | -0.00369 | .00400 | -0.00442 | 0.29 |
| 304: | 35 | 10 | 26 | 1 | 34 | 9 | 26 | 0 | 1288.40803 | -0.00502 | .00400 | -0.00442 | 0.21 |
| 305: | 35 | 10 | 25 | 1 | 34 | 9 | 26 | 0 | 1288.40803 | -0.00515 | .00400 | -0.00442 | 0.29 |

|      |    |    |    |   |    |    |    |   |            |          |        |          |      |
|------|----|----|----|---|----|----|----|---|------------|----------|--------|----------|------|
| 306: | 35 | 10 | 25 | 1 | 34 | 9  | 25 | 0 | 1288.40803 | -0.00381 | .00400 | -0.00442 | 0.21 |
| 307: | 37 | 10 | 27 | 1 | 36 | 9  | 28 | 0 | 1289.24524 | -0.00324 | .00400 | -0.00125 | 0.29 |
| 308: | 37 | 10 | 28 | 1 | 36 | 9  | 28 | 0 | 1289.24524 | -0.00286 | .00400 | -0.00125 | 0.21 |
| 309: | 37 | 10 | 27 | 1 | 36 | 9  | 27 | 0 | 1289.24524 | 0.00037  | .00400 | -0.00125 | 0.21 |
| 310: | 37 | 10 | 28 | 1 | 36 | 9  | 27 | 0 | 1289.24524 | 0.00074  | .00400 | -0.00125 | 0.29 |
| 311: | 38 | 10 | 28 | 1 | 37 | 9  | 28 | 0 | 1289.66153 | 0.00312  | .00400 | 0.00054  | 0.21 |
| 312: | 38 | 10 | 29 | 1 | 37 | 9  | 28 | 0 | 1289.66153 | 0.00375  | .00400 | 0.00054  | 0.29 |
| 313: | 38 | 10 | 28 | 1 | 37 | 9  | 29 | 0 | 1289.66153 | -0.00267 | .00400 | 0.00054  | 0.29 |
| 314: | 38 | 10 | 29 | 1 | 37 | 9  | 29 | 0 | 1289.66153 | -0.00204 | .00400 | 0.00054  | 0.21 |
| 315: | 11 | 11 | 0  | 1 | 10 | 10 | 1  | 0 | 1278.97022 | 0.00011  | .00400 | 0.00011  | 0.30 |
| 316: | 11 | 11 | 0  | 1 | 10 | 10 | 0  | 0 | 1278.97022 | 0.00011  | .00400 | 0.00011  | 0.20 |
| 317: | 11 | 11 | 1  | 1 | 10 | 10 | 1  | 0 | 1278.97022 | 0.00011  | .00400 | 0.00011  | 0.20 |
| 318: | 11 | 11 | 1  | 1 | 10 | 10 | 0  | 0 | 1278.97022 | 0.00011  | .00400 | 0.00011  | 0.30 |
| 319: | 17 | 11 | 6  | 1 | 16 | 10 | 6  | 0 | 1281.53147 | 0.00215  | .00400 | 0.00215  | 0.20 |
| 320: | 17 | 11 | 7  | 1 | 16 | 10 | 7  | 0 | 1281.53147 | 0.00215  | .00400 | 0.00215  | 0.20 |
| 321: | 17 | 11 | 7  | 1 | 16 | 10 | 6  | 0 | 1281.53147 | 0.00215  | .00400 | 0.00215  | 0.30 |
| 322: | 17 | 11 | 6  | 1 | 16 | 10 | 7  | 0 | 1281.53147 | 0.00215  | .00400 | 0.00215  | 0.30 |
| 323: | 18 | 11 | 7  | 1 | 17 | 10 | 8  | 0 | 1281.95869 | 0.00205  | .00400 | 0.00205  | 0.30 |
| 324: | 18 | 11 | 7  | 1 | 17 | 10 | 7  | 0 | 1281.95869 | 0.00205  | .00400 | 0.00205  | 0.20 |
| 325: | 18 | 11 | 8  | 1 | 17 | 10 | 7  | 0 | 1281.95869 | 0.00205  | .00400 | 0.00205  | 0.30 |
| 326: | 18 | 11 | 8  | 1 | 17 | 10 | 8  | 0 | 1281.95869 | 0.00205  | .00400 | 0.00205  | 0.20 |
| 327: | 20 | 11 | 9  | 1 | 19 | 10 | 9  | 0 | 1282.81527 | 0.00357  | .00400 | 0.00357  | 0.20 |
| 328: | 20 | 11 | 10 | 1 | 19 | 10 | 9  | 0 | 1282.81527 | 0.00357  | .00400 | 0.00357  | 0.30 |
| 329: | 20 | 11 | 10 | 1 | 19 | 10 | 10 | 0 | 1282.81527 | 0.00357  | .00400 | 0.00357  | 0.20 |
| 330: | 20 | 11 | 9  | 1 | 19 | 10 | 10 | 0 | 1282.81527 | 0.00357  | .00400 | 0.00357  | 0.30 |
| 331: | 21 | 11 | 11 | 1 | 20 | 10 | 10 | 0 | 1283.24067 | 0.00130  | .00400 | 0.00130  | 0.30 |
| 332: | 21 | 11 | 11 | 1 | 20 | 10 | 11 | 0 | 1283.24067 | 0.00130  | .00400 | 0.00130  | 0.20 |
| 333: | 21 | 11 | 10 | 1 | 20 | 10 | 10 | 0 | 1283.24067 | 0.00130  | .00400 | 0.00130  | 0.20 |
| 334: | 21 | 11 | 10 | 1 | 20 | 10 | 11 | 0 | 1283.24067 | 0.00130  | .00400 | 0.00130  | 0.30 |
| 335: | 22 | 11 | 12 | 1 | 21 | 10 | 11 | 0 | 1283.67083 | 0.00374  | .00400 | 0.00374  | 0.30 |
| 336: | 22 | 11 | 11 | 1 | 21 | 10 | 11 | 0 | 1283.67083 | 0.00374  | .00400 | 0.00374  | 0.20 |
| 337: | 22 | 11 | 11 | 1 | 21 | 10 | 12 | 0 | 1283.67083 | 0.00374  | .00400 | 0.00374  | 0.30 |
| 338: | 22 | 11 | 12 | 1 | 21 | 10 | 12 | 0 | 1283.67083 | 0.00374  | .00400 | 0.00374  | 0.20 |
| 339: | 23 | 11 | 12 | 1 | 22 | 10 | 12 | 0 | 1284.09561 | 0.00080  | .00400 | 0.00080  | 0.20 |
| 340: | 23 | 11 | 13 | 1 | 22 | 10 | 12 | 0 | 1284.09561 | 0.00080  | .00400 | 0.00080  | 0.30 |
| 341: | 23 | 11 | 12 | 1 | 22 | 10 | 13 | 0 | 1284.09561 | 0.00080  | .00400 | 0.00080  | 0.30 |
| 342: | 23 | 11 | 13 | 1 | 22 | 10 | 13 | 0 | 1284.09561 | 0.00080  | .00400 | 0.00080  | 0.20 |
| 343: | 24 | 11 | 14 | 1 | 23 | 10 | 13 | 0 | 1284.52732 | 0.00482  | .00400 | 0.00482  | 0.30 |
| 344: | 24 | 11 | 13 | 1 | 23 | 10 | 13 | 0 | 1284.52732 | 0.00482  | .00400 | 0.00482  | 0.20 |
| 345: | 24 | 11 | 13 | 1 | 23 | 10 | 14 | 0 | 1284.52732 | 0.00482  | .00400 | 0.00482  | 0.30 |
| 346: | 24 | 11 | 14 | 1 | 23 | 10 | 14 | 0 | 1284.52732 | 0.00482  | .00400 | 0.00482  | 0.20 |
| 347: | 25 | 11 | 14 | 1 | 24 | 10 | 15 | 0 | 1284.95104 | 0.00093  | .00400 | 0.00093  | 0.30 |
| 348: | 25 | 11 | 15 | 1 | 24 | 10 | 14 | 0 | 1284.95104 | 0.00093  | .00400 | 0.00093  | 0.30 |
| 349: | 25 | 11 | 14 | 1 | 24 | 10 | 14 | 0 | 1284.95104 | 0.00093  | .00400 | 0.00093  | 0.20 |
| 350: | 25 | 11 | 15 | 1 | 24 | 10 | 15 | 0 | 1284.95104 | 0.00093  | .00400 | 0.00093  | 0.20 |
| 351: | 27 | 11 | 16 | 1 | 26 | 10 | 16 | 0 | 1285.80180 | -0.00307 | .00400 | -0.00307 | 0.20 |
| 352: | 27 | 11 | 17 | 1 | 26 | 10 | 16 | 0 | 1285.80180 | -0.00307 | .00400 | -0.00307 | 0.30 |
| 353: | 27 | 11 | 17 | 1 | 26 | 10 | 17 | 0 | 1285.80180 | -0.00307 | .00400 | -0.00307 | 0.20 |
| 354: | 27 | 11 | 16 | 1 | 26 | 10 | 17 | 0 | 1285.80180 | -0.00307 | .00400 | -0.00307 | 0.30 |
| 355: | 28 | 11 | 17 | 1 | 27 | 10 | 18 | 0 | 1286.22861 | -0.00332 | .00400 | -0.00332 | 0.30 |
| 356: | 28 | 11 | 18 | 1 | 27 | 10 | 17 | 0 | 1286.22861 | -0.00332 | .00400 | -0.00332 | 0.30 |
| 357: | 28 | 11 | 17 | 1 | 27 | 10 | 17 | 0 | 1286.22861 | -0.00332 | .00400 | -0.00332 | 0.20 |
| 358: | 28 | 11 | 18 | 1 | 27 | 10 | 18 | 0 | 1286.22861 | -0.00332 | .00400 | -0.00332 | 0.20 |
| 359: | 29 | 11 | 19 | 1 | 28 | 10 | 18 | 0 | 1286.65827 | -0.00042 | .00400 | -0.00042 | 0.29 |
| 360: | 29 | 11 | 18 | 1 | 28 | 10 | 18 | 0 | 1286.65827 | -0.00042 | .00400 | -0.00042 | 0.21 |
| 361: | 29 | 11 | 19 | 1 | 28 | 10 | 19 | 0 | 1286.65827 | -0.00042 | .00400 | -0.00042 | 0.21 |
| 362: | 29 | 11 | 18 | 1 | 28 | 10 | 19 | 0 | 1286.65827 | -0.00042 | .00400 | -0.00042 | 0.29 |
| 363: | 30 | 11 | 19 | 1 | 29 | 10 | 20 | 0 | 1287.08459 | -0.00051 | .00400 | -0.00051 | 0.29 |
| 364: | 30 | 11 | 20 | 1 | 29 | 10 | 19 | 0 | 1287.08459 | -0.00051 | .00400 | -0.00051 | 0.29 |
| 365: | 30 | 11 | 19 | 1 | 29 | 10 | 19 | 0 | 1287.08459 | -0.00051 | .00400 | -0.00051 | 0.21 |
| 366: | 30 | 11 | 20 | 1 | 29 | 10 | 20 | 0 | 1287.08459 | -0.00051 | .00400 | -0.00051 | 0.21 |
| 367: | 31 | 11 | 21 | 1 | 30 | 10 | 21 | 0 | 1287.51309 | 0.00200  | .00400 | 0.00201  | 0.21 |
| 368: | 31 | 11 | 21 | 1 | 30 | 10 | 20 | 0 | 1287.51309 | 0.00201  | .00400 | 0.00201  | 0.29 |
| 369: | 31 | 11 | 20 | 1 | 30 | 10 | 20 | 0 | 1287.51309 | 0.00201  | .00400 | 0.00201  | 0.21 |
| 370: | 31 | 11 | 20 | 1 | 30 | 10 | 21 | 0 | 1287.51309 | 0.00200  | .00400 | 0.00201  | 0.29 |
| 371: | 32 | 11 | 22 | 1 | 31 | 10 | 21 | 0 | 1287.93545 | -0.00112 | .00400 | -0.00113 | 0.29 |
| 372: | 32 | 11 | 21 | 1 | 31 | 10 | 21 | 0 | 1287.93545 | -0.00112 | .00400 | -0.00113 | 0.21 |
| 373: | 32 | 11 | 22 | 1 | 31 | 10 | 22 | 0 | 1287.93545 | -0.00113 | .00400 | -0.00113 | 0.21 |
| 374: | 32 | 11 | 21 | 1 | 31 | 10 | 22 | 0 | 1287.93545 | -0.00113 | .00400 | -0.00113 | 0.29 |
| 375: | 33 | 11 | 22 | 1 | 32 | 10 | 23 | 0 | 1288.36372 | 0.00220  | .00400 | 0.00221  | 0.29 |
| 376: | 33 | 11 | 23 | 1 | 32 | 10 | 23 | 0 | 1288.36372 | 0.00220  | .00400 | 0.00221  | 0.21 |
| 377: | 33 | 11 | 23 | 1 | 32 | 10 | 22 | 0 | 1288.36372 | 0.00222  | .00400 | 0.00221  | 0.29 |
| 378: | 33 | 11 | 22 | 1 | 32 | 10 | 22 | 0 | 1288.36372 | 0.00222  | .00400 | 0.00221  | 0.21 |
| 379: | 34 | 11 | 24 | 1 | 33 | 10 | 23 | 0 | 1288.78562 | -0.00015 | .00400 | -0.00017 | 0.29 |
| 380: | 34 | 11 | 23 | 1 | 33 | 10 | 23 | 0 | 1288.78562 | -0.00015 | .00400 | -0.00017 | 0.21 |
| 381: | 34 | 11 | 24 | 1 | 33 | 10 | 24 | 0 | 1288.78562 | -0.00019 | .00400 | -0.00017 | 0.21 |
| 382: | 34 | 11 | 23 | 1 | 33 | 10 | 24 | 0 | 1288.78562 | -0.00019 | .00400 | -0.00017 | 0.29 |
| 383: | 35 | 11 | 25 | 1 | 34 | 10 | 25 | 0 | 1289.20952 | 0.00014  | .00400 | 0.00018  | 0.21 |

|      |    |    |    |   |    |    |    |   |            |          |        |          |      |
|------|----|----|----|---|----|----|----|---|------------|----------|--------|----------|------|
| 384: | 35 | 11 | 24 | 1 | 34 | 10 | 25 | 0 | 1289.20952 | 0.00014  | .00400 | 0.00018  | 0.29 |
| 385: | 35 | 11 | 24 | 1 | 34 | 10 | 24 | 0 | 1289.20952 | 0.00021  | .00400 | 0.00018  | 0.21 |
| 386: | 35 | 11 | 25 | 1 | 34 | 10 | 24 | 0 | 1289.20952 | 0.00022  | .00400 | 0.00018  | 0.29 |
| 387: | 36 | 11 | 25 | 1 | 35 | 10 | 26 | 0 | 1289.63300 | 0.00085  | .00400 | 0.00093  | 0.29 |
| 388: | 36 | 11 | 25 | 1 | 35 | 10 | 25 | 0 | 1289.63300 | 0.00098  | .00400 | 0.00093  | 0.21 |
| 389: | 36 | 11 | 26 | 1 | 35 | 10 | 26 | 0 | 1289.63300 | 0.00086  | .00400 | 0.00093  | 0.21 |
| 390: | 36 | 11 | 26 | 1 | 35 | 10 | 25 | 0 | 1289.63300 | 0.00100  | .00400 | 0.00093  | 0.29 |
| 391: | 37 | 11 | 27 | 1 | 36 | 10 | 27 | 0 | 1290.05520 | 0.00121  | .00400 | 0.00132  | 0.21 |
| 392: | 37 | 11 | 26 | 1 | 36 | 10 | 27 | 0 | 1290.05520 | 0.00119  | .00400 | 0.00132  | 0.29 |
| 393: | 37 | 11 | 27 | 1 | 36 | 10 | 26 | 0 | 1290.05520 | 0.00144  | .00400 | 0.00132  | 0.29 |
| 394: | 37 | 11 | 26 | 1 | 36 | 10 | 26 | 0 | 1290.05520 | 0.00142  | .00400 | 0.00132  | 0.21 |
| 395: | 41 | 11 | 30 | 1 | 40 | 10 | 31 | 0 | 1291.73294 | 0.00234  | .00400 | 0.00332  | 0.29 |
| 396: | 41 | 11 | 31 | 1 | 40 | 10 | 31 | 0 | 1291.73294 | 0.00252  | .00400 | 0.00332  | 0.21 |
| 397: | 41 | 11 | 30 | 1 | 40 | 10 | 30 | 0 | 1291.73294 | 0.00412  | .00400 | 0.00332  | 0.21 |
| 398: | 41 | 11 | 31 | 1 | 40 | 10 | 30 | 0 | 1291.73294 | 0.00430  | .00400 | 0.00332  | 0.29 |
| 399: | 42 | 11 | 31 | 1 | 41 | 10 | 32 | 0 | 1292.14706 | 0.00048  | .00400 | 0.00206  | 0.29 |
| 400: | 42 | 11 | 32 | 1 | 41 | 10 | 31 | 0 | 1292.14706 | 0.00364  | .00400 | 0.00206  | 0.29 |
| 401: | 42 | 11 | 31 | 1 | 41 | 10 | 31 | 0 | 1292.14706 | 0.00334  | .00400 | 0.00206  | 0.21 |
| 402: | 42 | 11 | 32 | 1 | 41 | 10 | 32 | 0 | 1292.14706 | 0.00078  | .00400 | 0.00206  | 0.21 |
| 403: | 18 | 12 | 6  | 1 | 17 | 11 | 6  | 0 | 1282.72202 | 0.00231  | .00400 | 0.00231  | 0.20 |
| 404: | 18 | 12 | 6  | 1 | 17 | 11 | 7  | 0 | 1282.72202 | 0.00231  | .00400 | 0.00231  | 0.30 |
| 405: | 18 | 12 | 7  | 1 | 17 | 11 | 6  | 0 | 1282.72202 | 0.00231  | .00400 | 0.00231  | 0.30 |
| 406: | 18 | 12 | 7  | 1 | 17 | 11 | 7  | 0 | 1282.72202 | 0.00231  | .00400 | 0.00231  | 0.20 |
| 407: | 20 | 12 | 8  | 1 | 19 | 11 | 9  | 0 | 1283.57920 | 0.00391  | .00400 | 0.00391  | 0.30 |
| 408: | 20 | 12 | 8  | 1 | 19 | 11 | 8  | 0 | 1283.57920 | 0.00391  | .00400 | 0.00391  | 0.20 |
| 409: | 20 | 12 | 9  | 1 | 19 | 11 | 9  | 0 | 1283.57920 | 0.00391  | .00400 | 0.00391  | 0.20 |
| 410: | 20 | 12 | 9  | 1 | 19 | 11 | 8  | 0 | 1283.57920 | 0.00391  | .00400 | 0.00391  | 0.30 |
| 411: | 21 | 12 | 10 | 1 | 20 | 11 | 10 | 0 | 1284.00411 | 0.00080  | .00400 | 0.00080  | 0.20 |
| 412: | 21 | 12 | 10 | 1 | 20 | 11 | 9  | 0 | 1284.00411 | 0.00080  | .00400 | 0.00080  | 0.30 |
| 413: | 21 | 12 | 9  | 1 | 20 | 11 | 9  | 0 | 1284.00411 | 0.00080  | .00400 | 0.00080  | 0.20 |
| 414: | 21 | 12 | 9  | 1 | 20 | 11 | 10 | 0 | 1284.00411 | 0.00080  | .00400 | 0.00080  | 0.30 |
| 415: | 22 | 12 | 10 | 1 | 21 | 11 | 11 | 0 | 1284.43369 | 0.00223  | .00400 | 0.00223  | 0.30 |
| 416: | 22 | 12 | 11 | 1 | 21 | 11 | 10 | 0 | 1284.43369 | 0.00223  | .00400 | 0.00223  | 0.30 |
| 417: | 22 | 12 | 10 | 1 | 21 | 11 | 10 | 0 | 1284.43369 | 0.00223  | .00400 | 0.00223  | 0.20 |
| 418: | 22 | 12 | 11 | 1 | 21 | 11 | 11 | 0 | 1284.43369 | 0.00223  | .00400 | 0.00223  | 0.20 |
| 419: | 23 | 12 | 11 | 1 | 22 | 11 | 12 | 0 | 1284.86104 | 0.00133  | .00400 | 0.00133  | 0.30 |
| 420: | 23 | 12 | 12 | 1 | 22 | 11 | 11 | 0 | 1284.86104 | 0.00133  | .00400 | 0.00133  | 0.30 |
| 421: | 23 | 12 | 11 | 1 | 22 | 11 | 11 | 0 | 1284.86104 | 0.00133  | .00400 | 0.00133  | 0.20 |
| 422: | 23 | 12 | 12 | 1 | 22 | 11 | 12 | 0 | 1284.86104 | 0.00133  | .00400 | 0.00133  | 0.20 |
| 423: | 24 | 12 | 12 | 1 | 23 | 11 | 13 | 0 | 1285.28847 | 0.00046  | .00400 | 0.00046  | 0.30 |
| 424: | 24 | 12 | 12 | 1 | 23 | 11 | 12 | 0 | 1285.28847 | 0.00046  | .00400 | 0.00046  | 0.20 |
| 425: | 24 | 12 | 13 | 1 | 23 | 11 | 13 | 0 | 1285.28847 | 0.00046  | .00400 | 0.00046  | 0.20 |
| 426: | 24 | 12 | 13 | 1 | 23 | 11 | 12 | 0 | 1285.28847 | 0.00046  | .00400 | 0.00046  | 0.30 |
| 427: | 25 | 12 | 13 | 1 | 24 | 11 | 13 | 0 | 1285.71570 | -0.00064 | .00400 | -0.00064 | 0.20 |
| 428: | 25 | 12 | 14 | 1 | 24 | 11 | 13 | 0 | 1285.71570 | -0.00064 | .00400 | -0.00064 | 0.30 |
| 429: | 25 | 12 | 14 | 1 | 24 | 11 | 14 | 0 | 1285.71570 | -0.00064 | .00400 | -0.00064 | 0.20 |
| 430: | 25 | 12 | 13 | 1 | 24 | 11 | 14 | 0 | 1285.71570 | -0.00064 | .00400 | -0.00064 | 0.30 |
| 431: | 26 | 12 | 15 | 1 | 25 | 11 | 14 | 0 | 1286.14313 | -0.00152 | .00400 | -0.00152 | 0.30 |
| 432: | 26 | 12 | 14 | 1 | 25 | 11 | 15 | 0 | 1286.14313 | -0.00152 | .00400 | -0.00152 | 0.30 |
| 433: | 26 | 12 | 15 | 1 | 25 | 11 | 15 | 0 | 1286.14313 | -0.00152 | .00400 | -0.00152 | 0.20 |
| 434: | 26 | 12 | 14 | 1 | 25 | 11 | 14 | 0 | 1286.14313 | -0.00152 | .00400 | -0.00152 | 0.20 |
| 435: | 27 | 12 | 16 | 1 | 26 | 11 | 15 | 0 | 1286.57307 | 0.00015  | .00400 | 0.00015  | 0.30 |
| 436: | 27 | 12 | 15 | 1 | 26 | 11 | 16 | 0 | 1286.57307 | 0.00015  | .00400 | 0.00015  | 0.30 |
| 437: | 27 | 12 | 15 | 1 | 26 | 11 | 15 | 0 | 1286.57307 | 0.00015  | .00400 | 0.00015  | 0.20 |
| 438: | 27 | 12 | 16 | 1 | 26 | 11 | 16 | 0 | 1286.57307 | 0.00015  | .00400 | 0.00015  | 0.20 |
| 439: | 28 | 12 | 17 | 1 | 27 | 11 | 16 | 0 | 1287.00369 | 0.00258  | .00400 | 0.00258  | 0.30 |
| 440: | 28 | 12 | 16 | 1 | 27 | 11 | 17 | 0 | 1287.00369 | 0.00258  | .00400 | 0.00258  | 0.30 |
| 441: | 28 | 12 | 16 | 1 | 27 | 11 | 16 | 0 | 1287.00369 | 0.00258  | .00400 | 0.00258  | 0.20 |
| 442: | 28 | 12 | 17 | 1 | 27 | 11 | 17 | 0 | 1287.00369 | 0.00258  | .00400 | 0.00258  | 0.20 |
| 443: | 30 | 12 | 18 | 1 | 29 | 11 | 18 | 0 | 1287.85531 | -0.00173 | .00400 | -0.00173 | 0.20 |
| 444: | 30 | 12 | 19 | 1 | 29 | 11 | 19 | 0 | 1287.85531 | -0.00173 | .00400 | -0.00173 | 0.20 |
| 445: | 30 | 12 | 18 | 1 | 29 | 11 | 19 | 0 | 1287.85531 | -0.00173 | .00400 | -0.00173 | 0.30 |
| 446: | 30 | 12 | 19 | 1 | 29 | 11 | 18 | 0 | 1287.85531 | -0.00173 | .00400 | -0.00173 | 0.30 |
| 447: | 31 | 12 | 20 | 1 | 30 | 11 | 20 | 0 | 1288.28362 | -0.00107 | .00400 | -0.00107 | 0.20 |
| 448: | 31 | 12 | 20 | 1 | 30 | 11 | 19 | 0 | 1288.28362 | -0.00107 | .00400 | -0.00107 | 0.30 |
| 449: | 31 | 12 | 19 | 1 | 30 | 11 | 19 | 0 | 1288.28362 | -0.00107 | .00400 | -0.00107 | 0.20 |
| 450: | 31 | 12 | 19 | 1 | 30 | 11 | 20 | 0 | 1288.28362 | -0.00107 | .00400 | -0.00107 | 0.30 |
| 451: | 33 | 12 | 22 | 1 | 32 | 11 | 22 | 0 | 1289.13824 | -0.00089 | .00400 | -0.00089 | 0.21 |
| 452: | 33 | 12 | 21 | 1 | 32 | 11 | 22 | 0 | 1289.13824 | -0.00089 | .00400 | -0.00089 | 0.29 |
| 453: | 33 | 12 | 21 | 1 | 32 | 11 | 21 | 0 | 1289.13824 | -0.00089 | .00400 | -0.00089 | 0.21 |
| 454: | 33 | 12 | 22 | 1 | 32 | 11 | 21 | 0 | 1289.13824 | -0.00089 | .00400 | -0.00089 | 0.29 |
| 455: | 35 | 12 | 23 | 1 | 34 | 11 | 24 | 0 | 1289.99038 | -0.00166 | .00400 | -0.00166 | 0.29 |
| 456: | 35 | 12 | 24 | 1 | 34 | 11 | 23 | 0 | 1289.99038 | -0.00166 | .00400 | -0.00166 | 0.29 |
| 457: | 35 | 12 | 23 | 1 | 34 | 11 | 23 | 0 | 1289.99038 | -0.00166 | .00400 | -0.00166 | 0.21 |
| 458: | 35 | 12 | 24 | 1 | 34 | 11 | 24 | 0 | 1289.99038 | -0.00166 | .00400 | -0.00166 | 0.21 |
| 459: | 19 | 13 | 6  | 1 | 18 | 12 | 6  | 0 | 1283.91135 | 0.00285  | .00400 | 0.00285  | 0.20 |
| 460: | 19 | 13 | 7  | 1 | 18 | 12 | 6  | 0 | 1283.91135 | 0.00285  | .00400 | 0.00285  | 0.30 |
| 461: | 19 | 13 | 7  | 1 | 18 | 12 | 7  | 0 | 1283.91135 | 0.00285  | .00400 | 0.00285  | 0.20 |

|      |    |    |    |   |    |    |    |   |            |          |        |          |      |
|------|----|----|----|---|----|----|----|---|------------|----------|--------|----------|------|
| 462: | 19 | 13 | 6  | 1 | 18 | 12 | 7  | 0 | 1283.91135 | 0.00285  | .00400 | 0.00285  | 0.30 |
| 463: | 20 | 13 | 8  | 1 | 19 | 12 | 8  | 0 | 1284.33855 | 0.00199  | .00400 | 0.00199  | 0.20 |
| 464: | 20 | 13 | 7  | 1 | 19 | 12 | 8  | 0 | 1284.33855 | 0.00199  | .00400 | 0.00199  | 0.30 |
| 465: | 20 | 13 | 7  | 1 | 19 | 12 | 7  | 0 | 1284.33855 | 0.00199  | .00400 | 0.00199  | 0.20 |
| 466: | 20 | 13 | 8  | 1 | 19 | 12 | 7  | 0 | 1284.33855 | 0.00199  | .00400 | 0.00199  | 0.30 |
| 467: | 21 | 13 | 8  | 1 | 20 | 12 | 8  | 0 | 1284.76692 | 0.00211  | .00400 | 0.00211  | 0.20 |
| 468: | 21 | 13 | 9  | 1 | 20 | 12 | 9  | 0 | 1284.76692 | 0.00211  | .00400 | 0.00211  | 0.20 |
| 469: | 21 | 13 | 9  | 1 | 20 | 12 | 8  | 0 | 1284.76692 | 0.00211  | .00400 | 0.00211  | 0.30 |
| 470: | 21 | 13 | 8  | 1 | 20 | 12 | 9  | 0 | 1284.76692 | 0.00211  | .00400 | 0.00211  | 0.30 |
| 471: | 22 | 13 | 9  | 1 | 21 | 12 | 9  | 0 | 1285.19217 | -0.00107 | .00400 | -0.00107 | 0.20 |
| 472: | 22 | 13 | 10 | 1 | 21 | 12 | 10 | 0 | 1285.19217 | -0.00107 | .00400 | -0.00107 | 0.20 |
| 473: | 22 | 13 | 10 | 1 | 21 | 12 | 9  | 0 | 1285.19217 | -0.00107 | .00400 | -0.00107 | 0.30 |
| 474: | 22 | 13 | 9  | 1 | 21 | 12 | 10 | 0 | 1285.19217 | -0.00107 | .00400 | -0.00107 | 0.30 |
| 475: | 23 | 13 | 11 | 1 | 22 | 12 | 11 | 0 | 1285.62066 | -0.00115 | .00400 | -0.00115 | 0.20 |
| 476: | 23 | 13 | 11 | 1 | 22 | 12 | 10 | 0 | 1285.62066 | -0.00115 | .00400 | -0.00115 | 0.30 |
| 477: | 23 | 13 | 10 | 1 | 22 | 12 | 11 | 0 | 1285.62066 | -0.00115 | .00400 | -0.00115 | 0.30 |
| 478: | 23 | 13 | 10 | 1 | 22 | 12 | 10 | 0 | 1285.62066 | -0.00115 | .00400 | -0.00115 | 0.20 |
| 479: | 24 | 13 | 12 | 1 | 23 | 12 | 12 | 0 | 1286.04726 | -0.00325 | .00400 | -0.00325 | 0.20 |
| 480: | 24 | 13 | 11 | 1 | 23 | 12 | 11 | 0 | 1286.04726 | -0.00325 | .00400 | -0.00325 | 0.20 |
| 481: | 24 | 13 | 12 | 1 | 23 | 12 | 11 | 0 | 1286.04726 | -0.00325 | .00400 | -0.00325 | 0.30 |
| 482: | 24 | 13 | 11 | 1 | 23 | 12 | 12 | 0 | 1286.04726 | -0.00325 | .00400 | -0.00325 | 0.30 |
| 483: | 26 | 13 | 13 | 1 | 25 | 12 | 13 | 0 | 1286.90749 | -0.00069 | .00400 | -0.00069 | 0.20 |
| 484: | 26 | 13 | 14 | 1 | 25 | 12 | 14 | 0 | 1286.90749 | -0.00069 | .00400 | -0.00069 | 0.20 |
| 485: | 26 | 13 | 14 | 1 | 25 | 12 | 13 | 0 | 1286.90749 | -0.00069 | .00400 | -0.00069 | 0.30 |
| 486: | 26 | 13 | 13 | 1 | 25 | 12 | 14 | 0 | 1286.90749 | -0.00069 | .00400 | -0.00069 | 0.30 |
| 487: | 27 | 13 | 14 | 1 | 26 | 12 | 15 | 0 | 1287.33712 | 0.00003  | .00400 | 0.00003  | 0.30 |
| 488: | 27 | 13 | 15 | 1 | 26 | 12 | 14 | 0 | 1287.33712 | 0.00003  | .00400 | 0.00003  | 0.30 |
| 489: | 27 | 13 | 15 | 1 | 26 | 12 | 15 | 0 | 1287.33712 | 0.00003  | .00400 | 0.00003  | 0.20 |
| 490: | 27 | 13 | 14 | 1 | 26 | 12 | 14 | 0 | 1287.33712 | 0.00003  | .00400 | 0.00003  | 0.20 |
| 491: | 28 | 13 | 16 | 1 | 27 | 12 | 16 | 0 | 1287.76322 | -0.00280 | .00400 | -0.00280 | 0.20 |
| 492: | 28 | 13 | 15 | 1 | 27 | 12 | 16 | 0 | 1287.76322 | -0.00280 | .00400 | -0.00280 | 0.30 |
| 493: | 28 | 13 | 16 | 1 | 27 | 12 | 15 | 0 | 1287.76322 | -0.00280 | .00400 | -0.00280 | 0.30 |
| 494: | 28 | 13 | 15 | 1 | 27 | 12 | 15 | 0 | 1287.76322 | -0.00280 | .00400 | -0.00280 | 0.20 |
| 495: | 29 | 13 | 16 | 1 | 28 | 12 | 17 | 0 | 1288.19538 | 0.00047  | .00400 | 0.00047  | 0.30 |
| 496: | 29 | 13 | 17 | 1 | 28 | 12 | 17 | 0 | 1288.19538 | 0.00047  | .00400 | 0.00047  | 0.20 |
| 497: | 29 | 13 | 17 | 1 | 28 | 12 | 16 | 0 | 1288.19538 | 0.00047  | .00400 | 0.00047  | 0.30 |
| 498: | 29 | 13 | 16 | 1 | 28 | 12 | 16 | 0 | 1288.19538 | 0.00047  | .00400 | 0.00047  | 0.20 |
| 499: | 30 | 13 | 18 | 1 | 29 | 12 | 18 | 0 | 1288.62824 | 0.00448  | .00400 | 0.00448  | 0.20 |
| 500: | 30 | 13 | 17 | 1 | 29 | 12 | 18 | 0 | 1288.62824 | 0.00448  | .00400 | 0.00448  | 0.30 |
| 501: | 30 | 13 | 18 | 1 | 29 | 12 | 17 | 0 | 1288.62824 | 0.00448  | .00400 | 0.00448  | 0.30 |
| 502: | 30 | 13 | 17 | 1 | 29 | 12 | 17 | 0 | 1288.62824 | 0.00448  | .00400 | 0.00448  | 0.20 |
| 503: | 31 | 13 | 19 | 1 | 30 | 12 | 18 | 0 | 1289.05210 | -0.00041 | .00400 | -0.00041 | 0.30 |
| 504: | 31 | 13 | 19 | 1 | 30 | 12 | 19 | 0 | 1289.05210 | -0.00041 | .00400 | -0.00041 | 0.20 |
| 505: | 31 | 13 | 18 | 1 | 30 | 12 | 19 | 0 | 1289.05210 | -0.00041 | .00400 | -0.00041 | 0.30 |
| 506: | 31 | 13 | 18 | 1 | 30 | 12 | 18 | 0 | 1289.05210 | -0.00041 | .00400 | -0.00041 | 0.20 |
| 507: | 32 | 13 | 19 | 1 | 31 | 12 | 19 | 0 | 1289.48019 | -0.00094 | .00400 | -0.00094 | 0.20 |
| 508: | 32 | 13 | 20 | 1 | 31 | 12 | 19 | 0 | 1289.48019 | -0.00094 | .00400 | -0.00094 | 0.30 |
| 509: | 32 | 13 | 19 | 1 | 31 | 12 | 20 | 0 | 1289.48019 | -0.00094 | .00400 | -0.00094 | 0.30 |
| 510: | 32 | 13 | 20 | 1 | 31 | 12 | 20 | 0 | 1289.48019 | -0.00094 | .00400 | -0.00094 | 0.20 |
| 511: | 33 | 13 | 21 | 1 | 32 | 12 | 20 | 0 | 1289.91125 | 0.00167  | .00400 | 0.00167  | 0.30 |
| 512: | 33 | 13 | 20 | 1 | 32 | 12 | 21 | 0 | 1289.91125 | 0.00167  | .00400 | 0.00167  | 0.30 |
| 513: | 33 | 13 | 21 | 1 | 32 | 12 | 21 | 0 | 1289.91125 | 0.00167  | .00400 | 0.00167  | 0.20 |
| 514: | 33 | 13 | 20 | 1 | 32 | 12 | 20 | 0 | 1289.91125 | 0.00167  | .00400 | 0.00167  | 0.20 |
| 515: | 35 | 13 | 23 | 1 | 34 | 12 | 22 | 0 | 1290.76535 | -0.00046 | .00400 | -0.00046 | 0.29 |
| 516: | 35 | 13 | 22 | 1 | 34 | 12 | 22 | 0 | 1290.76535 | -0.00046 | .00400 | -0.00046 | 0.21 |
| 517: | 35 | 13 | 23 | 1 | 34 | 12 | 23 | 0 | 1290.76535 | -0.00046 | .00400 | -0.00046 | 0.21 |
| 518: | 35 | 13 | 22 | 1 | 34 | 12 | 23 | 0 | 1290.76535 | -0.00046 | .00400 | -0.00046 | 0.29 |
| 519: | 36 | 13 | 23 | 1 | 35 | 12 | 24 | 0 | 1291.19519 | 0.00170  | .00400 | 0.00170  | 0.29 |
| 520: | 36 | 13 | 24 | 1 | 35 | 12 | 23 | 0 | 1291.19519 | 0.00170  | .00400 | 0.00170  | 0.29 |
| 521: | 36 | 13 | 23 | 1 | 35 | 12 | 23 | 0 | 1291.19519 | 0.00170  | .00400 | 0.00170  | 0.21 |
| 522: | 36 | 13 | 24 | 1 | 35 | 12 | 24 | 0 | 1291.19519 | 0.00170  | .00400 | 0.00170  | 0.21 |
| 523: | 37 | 13 | 24 | 1 | 36 | 12 | 25 | 0 | 1291.62026 | -0.00057 | .00400 | -0.00057 | 0.29 |
| 524: | 37 | 13 | 25 | 1 | 36 | 12 | 25 | 0 | 1291.62026 | -0.00057 | .00400 | -0.00057 | 0.21 |
| 525: | 37 | 13 | 25 | 1 | 36 | 12 | 24 | 0 | 1291.62026 | -0.00057 | .00400 | -0.00057 | 0.29 |
| 526: | 37 | 13 | 24 | 1 | 36 | 12 | 24 | 0 | 1291.62026 | -0.00057 | .00400 | -0.00057 | 0.21 |
| 527: | 38 | 13 | 25 | 1 | 37 | 12 | 25 | 0 | 1292.04619 | -0.00157 | .00400 | -0.00157 | 0.21 |
| 528: | 38 | 13 | 26 | 1 | 37 | 12 | 25 | 0 | 1292.04619 | -0.00157 | .00400 | -0.00157 | 0.29 |
| 529: | 38 | 13 | 25 | 1 | 37 | 12 | 26 | 0 | 1292.04619 | -0.00157 | .00400 | -0.00157 | 0.29 |
| 530: | 38 | 13 | 26 | 1 | 37 | 12 | 26 | 0 | 1292.04619 | -0.00157 | .00400 | -0.00157 | 0.21 |
| 531: | 39 | 13 | 27 | 1 | 38 | 12 | 27 | 0 | 1292.47382 | -0.00043 | .00400 | -0.00043 | 0.21 |
| 532: | 39 | 13 | 26 | 1 | 38 | 12 | 26 | 0 | 1292.47382 | -0.00043 | .00400 | -0.00043 | 0.21 |
| 533: | 39 | 13 | 26 | 1 | 38 | 12 | 27 | 0 | 1292.47382 | -0.00043 | .00400 | -0.00043 | 0.29 |
| 534: | 39 | 13 | 27 | 1 | 38 | 12 | 26 | 0 | 1292.47382 | -0.00043 | .00400 | -0.00043 | 0.29 |
| 535: | 40 | 13 | 27 | 1 | 39 | 12 | 28 | 0 | 1292.90279 | 0.00257  | .00400 | 0.00257  | 0.29 |
| 536: | 40 | 13 | 27 | 1 | 39 | 12 | 27 | 0 | 1292.90279 | 0.00257  | .00400 | 0.00257  | 0.21 |
| 537: | 40 | 13 | 28 | 1 | 39 | 12 | 27 | 0 | 1292.90279 | 0.00257  | .00400 | 0.00257  | 0.29 |
| 538: | 40 | 13 | 28 | 1 | 39 | 12 | 28 | 0 | 1292.90279 | 0.00257  | .00400 | 0.00257  | 0.21 |
| 539: | 41 | 13 | 28 | 1 | 40 | 12 | 28 | 0 | 1293.32822 | 0.00260  | .00400 | 0.00260  | 0.21 |

|      |    |    |    |   |    |    |    |   |            |          |        |          |      |
|------|----|----|----|---|----|----|----|---|------------|----------|--------|----------|------|
| 540: | 41 | 13 | 29 | 1 | 40 | 12 | 29 | 0 | 1293.32822 | 0.00259  | .00400 | 0.00260  | 0.21 |
| 541: | 41 | 13 | 29 | 1 | 40 | 12 | 28 | 0 | 1293.32822 | 0.00260  | .00400 | 0.00260  | 0.29 |
| 542: | 41 | 13 | 28 | 1 | 40 | 12 | 29 | 0 | 1293.32822 | 0.00259  | .00400 | 0.00260  | 0.29 |
| 543: | 42 | 13 | 30 | 1 | 41 | 12 | 29 | 0 | 1293.74937 | -0.00102 | .00400 | -0.00102 | 0.29 |
| 544: | 42 | 13 | 29 | 1 | 41 | 12 | 29 | 0 | 1293.74937 | -0.00102 | .00400 | -0.00102 | 0.21 |
| 545: | 42 | 13 | 30 | 1 | 41 | 12 | 30 | 0 | 1293.74937 | -0.00103 | .00400 | -0.00102 | 0.21 |
| 546: | 42 | 13 | 29 | 1 | 41 | 12 | 30 | 0 | 1293.74937 | -0.00103 | .00400 | -0.00102 | 0.29 |
| 547: | 43 | 13 | 31 | 1 | 42 | 12 | 30 | 0 | 1294.17442 | -0.00003 | .00400 | -0.00004 | 0.50 |
| 548: | 43 | 13 | 30 | 1 | 42 | 12 | 31 | 0 | 1294.17442 | -0.00005 | .00400 | -0.00004 | 0.50 |
| 549: | 44 | 13 | 32 | 1 | 43 | 12 | 31 | 0 | 1294.59777 | 0.00003  | .00400 | 0.00001  | 0.50 |
| 550: | 44 | 13 | 31 | 1 | 43 | 12 | 32 | 0 | 1294.59777 | -0.00001 | .00400 | 0.00001  | 0.50 |
| 551: | 45 | 13 | 32 | 1 | 44 | 12 | 33 | 0 | 1295.02102 | 0.00078  | .00400 | 0.00081  | 0.50 |
| 552: | 45 | 13 | 33 | 1 | 44 | 12 | 32 | 0 | 1295.02102 | 0.00084  | .00400 | 0.00081  | 0.50 |
| 553: | 14 | 14 | 1  | 1 | 13 | 13 | 0  | 0 | 1282.53468 | 0.00413  | .00400 | 0.00413  | 0.30 |
| 554: | 14 | 14 | 0  | 1 | 13 | 13 | 0  | 0 | 1282.53468 | 0.00413  | .00400 | 0.00413  | 0.20 |
| 555: | 14 | 14 | 0  | 1 | 13 | 13 | 1  | 0 | 1282.53468 | 0.00413  | .00400 | 0.00413  | 0.30 |
| 556: | 14 | 14 | 1  | 1 | 13 | 13 | 1  | 0 | 1282.53468 | 0.00413  | .00400 | 0.00413  | 0.20 |
| 557: | 15 | 14 | 1  | 1 | 14 | 13 | 1  | 0 | 1282.95782 | 0.00045  | .00400 | 0.00045  | 0.20 |
| 558: | 15 | 14 | 2  | 1 | 14 | 13 | 1  | 0 | 1282.95782 | 0.00045  | .00400 | 0.00045  | 0.30 |
| 559: | 15 | 14 | 1  | 1 | 14 | 13 | 2  | 0 | 1282.95782 | 0.00045  | .00400 | 0.00045  | 0.30 |
| 560: | 15 | 14 | 2  | 1 | 14 | 13 | 2  | 0 | 1282.95782 | 0.00045  | .00400 | 0.00045  | 0.20 |
| 561: | 16 | 14 | 2  | 1 | 15 | 13 | 3  | 0 | 1283.38885 | 0.00437  | .00400 | 0.00437  | 0.30 |
| 562: | 16 | 14 | 2  | 1 | 15 | 13 | 2  | 0 | 1283.38885 | 0.00437  | .00400 | 0.00437  | 0.20 |
| 563: | 16 | 14 | 3  | 1 | 15 | 13 | 2  | 0 | 1283.38885 | 0.00437  | .00400 | 0.00437  | 0.30 |
| 564: | 16 | 14 | 3  | 1 | 15 | 13 | 3  | 0 | 1283.38885 | 0.00437  | .00400 | 0.00437  | 0.20 |
| 565: | 17 | 14 | 3  | 1 | 16 | 13 | 4  | 0 | 1283.81136 | -0.00051 | .00400 | -0.00051 | 0.30 |
| 566: | 17 | 14 | 3  | 1 | 16 | 13 | 3  | 0 | 1283.81136 | -0.00051 | .00400 | -0.00051 | 0.20 |
| 567: | 17 | 14 | 4  | 1 | 16 | 13 | 4  | 0 | 1283.81136 | -0.00051 | .00400 | -0.00051 | 0.20 |
| 568: | 17 | 14 | 4  | 1 | 16 | 13 | 3  | 0 | 1283.81136 | -0.00051 | .00400 | -0.00051 | 0.30 |
| 569: | 19 | 14 | 6  | 1 | 18 | 13 | 6  | 0 | 1284.67007 | 0.00260  | .00400 | 0.00260  | 0.20 |
| 570: | 19 | 14 | 6  | 1 | 18 | 13 | 5  | 0 | 1284.67007 | 0.00260  | .00400 | 0.00260  | 0.30 |
| 571: | 19 | 14 | 5  | 1 | 18 | 13 | 5  | 0 | 1284.67007 | 0.00260  | .00400 | 0.00260  | 0.20 |
| 572: | 19 | 14 | 5  | 1 | 18 | 13 | 6  | 0 | 1284.67007 | 0.00260  | .00400 | 0.00260  | 0.30 |
| 573: | 20 | 14 | 7  | 1 | 19 | 13 | 7  | 0 | 1285.09782 | 0.00217  | .00400 | 0.00217  | 0.20 |
| 574: | 20 | 14 | 7  | 1 | 19 | 13 | 6  | 0 | 1285.09782 | 0.00217  | .00400 | 0.00217  | 0.30 |
| 575: | 20 | 14 | 6  | 1 | 19 | 13 | 7  | 0 | 1285.09782 | 0.00217  | .00400 | 0.00217  | 0.30 |
| 576: | 20 | 14 | 6  | 1 | 19 | 13 | 6  | 0 | 1285.09782 | 0.00217  | .00400 | 0.00217  | 0.20 |
| 577: | 21 | 14 | 7  | 1 | 20 | 13 | 8  | 0 | 1285.52578 | 0.00173  | .00400 | 0.00174  | 0.30 |
| 578: | 21 | 14 | 7  | 1 | 20 | 13 | 7  | 0 | 1285.52578 | 0.00173  | .00400 | 0.00174  | 0.20 |
| 579: | 21 | 14 | 8  | 1 | 20 | 13 | 8  | 0 | 1285.52578 | 0.00173  | .00400 | 0.00174  | 0.20 |
| 580: | 21 | 14 | 8  | 1 | 20 | 13 | 7  | 0 | 1285.52578 | 0.00173  | .00400 | 0.00174  | 0.30 |
| 581: | 22 | 14 | 9  | 1 | 21 | 13 | 8  | 0 | 1285.95189 | -0.00076 | .00400 | -0.00076 | 0.30 |
| 582: | 22 | 14 | 8  | 1 | 21 | 13 | 9  | 0 | 1285.95189 | -0.00076 | .00400 | -0.00076 | 0.30 |
| 583: | 22 | 14 | 8  | 1 | 21 | 13 | 8  | 0 | 1285.95189 | -0.00076 | .00400 | -0.00076 | 0.20 |
| 584: | 22 | 14 | 9  | 1 | 21 | 13 | 9  | 0 | 1285.95189 | -0.00076 | .00400 | -0.00076 | 0.20 |
| 585: | 23 | 14 | 10 | 1 | 22 | 13 | 10 | 0 | 1286.37993 | -0.00152 | .00400 | -0.00152 | 0.20 |
| 586: | 23 | 14 | 9  | 1 | 22 | 13 | 9  | 0 | 1286.37993 | -0.00152 | .00400 | -0.00152 | 0.20 |
| 587: | 23 | 14 | 10 | 1 | 22 | 13 | 9  | 0 | 1286.37993 | -0.00152 | .00400 | -0.00152 | 0.30 |
| 588: | 23 | 14 | 9  | 1 | 22 | 13 | 10 | 0 | 1286.37993 | -0.00152 | .00400 | -0.00152 | 0.30 |
| 589: | 24 | 14 | 11 | 1 | 23 | 13 | 10 | 0 | 1286.80903 | -0.00138 | .00400 | -0.00138 | 0.30 |
| 590: | 24 | 14 | 10 | 1 | 23 | 13 | 11 | 0 | 1286.80903 | -0.00138 | .00400 | -0.00138 | 0.30 |
| 591: | 24 | 14 | 10 | 1 | 23 | 13 | 10 | 0 | 1286.80903 | -0.00138 | .00400 | -0.00138 | 0.20 |
| 592: | 24 | 14 | 11 | 1 | 23 | 13 | 11 | 0 | 1286.80903 | -0.00138 | .00400 | -0.00138 | 0.20 |
| 593: | 25 | 14 | 11 | 1 | 24 | 13 | 11 | 0 | 1287.23850 | -0.00103 | .00400 | -0.00103 | 0.20 |
| 594: | 25 | 14 | 12 | 1 | 24 | 13 | 12 | 0 | 1287.23850 | -0.00103 | .00400 | -0.00103 | 0.20 |
| 595: | 25 | 14 | 12 | 1 | 24 | 13 | 11 | 0 | 1287.23850 | -0.00103 | .00400 | -0.00103 | 0.30 |
| 596: | 25 | 14 | 11 | 1 | 24 | 13 | 12 | 0 | 1287.23850 | -0.00103 | .00400 | -0.00103 | 0.30 |
| 597: | 26 | 14 | 13 | 1 | 25 | 13 | 12 | 0 | 1287.66687 | -0.00190 | .00400 | -0.00190 | 0.30 |
| 598: | 26 | 14 | 13 | 1 | 25 | 13 | 13 | 0 | 1287.66687 | -0.00190 | .00400 | -0.00190 | 0.20 |
| 599: | 26 | 14 | 12 | 1 | 25 | 13 | 13 | 0 | 1287.66687 | -0.00190 | .00400 | -0.00190 | 0.30 |
| 600: | 26 | 14 | 12 | 1 | 25 | 13 | 12 | 0 | 1287.66687 | -0.00190 | .00400 | -0.00190 | 0.20 |
| 601: | 28 | 14 | 14 | 1 | 27 | 13 | 15 | 0 | 1288.52932 | 0.00179  | .00400 | 0.00179  | 0.30 |
| 602: | 28 | 14 | 14 | 1 | 27 | 13 | 14 | 0 | 1288.52932 | 0.00179  | .00400 | 0.00179  | 0.20 |
| 603: | 28 | 14 | 15 | 1 | 27 | 13 | 15 | 0 | 1288.52932 | 0.00179  | .00400 | 0.00179  | 0.20 |
| 604: | 28 | 14 | 15 | 1 | 27 | 13 | 14 | 0 | 1288.52932 | 0.00179  | .00400 | 0.00179  | 0.30 |
| 605: | 29 | 14 | 15 | 1 | 28 | 13 | 15 | 0 | 1288.95779 | 0.00078  | .00400 | 0.00078  | 0.20 |
| 606: | 29 | 14 | 16 | 1 | 28 | 13 | 16 | 0 | 1288.95779 | 0.00078  | .00400 | 0.00078  | 0.20 |
| 607: | 29 | 14 | 16 | 1 | 28 | 13 | 15 | 0 | 1288.95779 | 0.00078  | .00400 | 0.00078  | 0.30 |
| 608: | 29 | 14 | 15 | 1 | 28 | 13 | 16 | 0 | 1288.95779 | 0.00078  | .00400 | 0.00078  | 0.30 |
| 609: | 30 | 14 | 16 | 1 | 29 | 13 | 17 | 0 | 1289.38516 | -0.00135 | .00400 | -0.00135 | 0.30 |
| 610: | 30 | 14 | 17 | 1 | 29 | 13 | 16 | 0 | 1289.38516 | -0.00135 | .00400 | -0.00135 | 0.30 |
| 611: | 30 | 14 | 17 | 1 | 29 | 13 | 17 | 0 | 1289.38516 | -0.00135 | .00400 | -0.00135 | 0.20 |
| 612: | 30 | 14 | 16 | 1 | 29 | 13 | 16 | 0 | 1289.38516 | -0.00135 | .00400 | -0.00135 | 0.20 |
| 613: | 31 | 14 | 17 | 1 | 30 | 13 | 17 | 0 | 1289.81562 | -0.00038 | .00400 | -0.00038 | 0.20 |
| 614: | 31 | 14 | 17 | 1 | 30 | 13 | 18 | 0 | 1289.81562 | -0.00038 | .00400 | -0.00038 | 0.30 |
| 615: | 31 | 14 | 18 | 1 | 30 | 13 | 17 | 0 | 1289.81562 | -0.00038 | .00400 | -0.00038 | 0.30 |
| 616: | 31 | 14 | 18 | 1 | 30 | 13 | 18 | 0 | 1289.81562 | -0.00038 | .00400 | -0.00038 | 0.20 |
| 617: | 33 | 14 | 19 | 1 | 32 | 13 | 20 | 0 | 1290.67402 | -0.00085 | .00400 | -0.00085 | 0.30 |



|      |    |    |    |   |    |    |    |   |            |          |        |          |      |
|------|----|----|----|---|----|----|----|---|------------|----------|--------|----------|------|
| 618: | 33 | 14 | 19 | 1 | 32 | 13 | 19 | 0 | 1290.67402 | -0.00085 | .00400 | -0.00085 | 0.20 |
| 619: | 33 | 14 | 20 | 1 | 32 | 13 | 19 | 0 | 1290.67402 | -0.00085 | .00400 | -0.00085 | 0.30 |
| 620: | 33 | 14 | 20 | 1 | 32 | 13 | 20 | 0 | 1290.67402 | -0.00085 | .00400 | -0.00085 | 0.20 |
| 621: | 35 | 14 | 21 | 1 | 34 | 13 | 21 | 0 | 1291.53469 | 0.00134  | .00400 | 0.00134  | 0.20 |
| 622: | 35 | 14 | 22 | 1 | 34 | 13 | 21 | 0 | 1291.53469 | 0.00134  | .00400 | 0.00134  | 0.30 |
| 623: | 35 | 14 | 22 | 1 | 34 | 13 | 22 | 0 | 1291.53469 | 0.00134  | .00400 | 0.00134  | 0.20 |
| 624: | 35 | 14 | 21 | 1 | 34 | 13 | 22 | 0 | 1291.53469 | 0.00134  | .00400 | 0.00134  | 0.30 |
| 625: | 36 | 14 | 23 | 1 | 35 | 13 | 23 | 0 | 1291.96142 | -0.00094 | .00400 | -0.00095 | 0.20 |
| 626: | 36 | 14 | 22 | 1 | 35 | 13 | 22 | 0 | 1291.96142 | -0.00094 | .00400 | -0.00095 | 0.20 |
| 627: | 36 | 14 | 22 | 1 | 35 | 13 | 23 | 0 | 1291.96142 | -0.00094 | .00400 | -0.00095 | 0.30 |
| 628: | 36 | 14 | 23 | 1 | 35 | 13 | 22 | 0 | 1291.96142 | -0.00094 | .00400 | -0.00095 | 0.30 |
| 629: | 37 | 14 | 23 | 1 | 36 | 13 | 23 | 0 | 1292.38988 | -0.00129 | .00400 | -0.00130 | 0.20 |
| 630: | 37 | 14 | 24 | 1 | 36 | 13 | 24 | 0 | 1292.38988 | -0.00129 | .00400 | -0.00130 | 0.20 |
| 631: | 37 | 14 | 23 | 1 | 36 | 13 | 24 | 0 | 1292.38988 | -0.00129 | .00400 | -0.00130 | 0.29 |
| 632: | 37 | 14 | 24 | 1 | 36 | 13 | 23 | 0 | 1292.38988 | -0.00129 | .00400 | -0.00130 | 0.29 |
| 633: | 38 | 14 | 24 | 1 | 37 | 13 | 24 | 0 | 1292.81889 | -0.00085 | .00400 | -0.00085 | 0.21 |
| 634: | 38 | 14 | 25 | 1 | 37 | 13 | 24 | 0 | 1292.81889 | -0.00085 | .00400 | -0.00085 | 0.29 |
| 635: | 38 | 14 | 25 | 1 | 37 | 13 | 25 | 0 | 1292.81889 | -0.00085 | .00400 | -0.00085 | 0.21 |
| 636: | 38 | 14 | 24 | 1 | 37 | 13 | 25 | 0 | 1292.81889 | -0.00085 | .00400 | -0.00085 | 0.29 |
| 637: | 39 | 14 | 26 | 1 | 38 | 13 | 25 | 0 | 1293.24712 | -0.00091 | .00400 | -0.00091 | 0.29 |
| 638: | 39 | 14 | 26 | 1 | 38 | 13 | 26 | 0 | 1293.24712 | -0.00091 | .00400 | -0.00091 | 0.21 |
| 639: | 39 | 14 | 25 | 1 | 38 | 13 | 25 | 0 | 1293.24712 | -0.00091 | .00400 | -0.00091 | 0.21 |
| 640: | 39 | 14 | 25 | 1 | 38 | 13 | 26 | 0 | 1293.24712 | -0.00091 | .00400 | -0.00091 | 0.29 |
| 641: | 40 | 14 | 26 | 1 | 39 | 13 | 27 | 0 | 1293.67209 | -0.00391 | .00400 | -0.00391 | 0.29 |
| 642: | 40 | 14 | 27 | 1 | 39 | 13 | 27 | 0 | 1293.67209 | -0.00391 | .00400 | -0.00391 | 0.21 |
| 643: | 40 | 14 | 26 | 1 | 39 | 13 | 26 | 0 | 1293.67209 | -0.00391 | .00400 | -0.00391 | 0.21 |
| 644: | 40 | 14 | 27 | 1 | 39 | 13 | 26 | 0 | 1293.67209 | -0.00391 | .00400 | -0.00391 | 0.29 |
| 645: | 41 | 14 | 27 | 1 | 40 | 13 | 28 | 0 | 1294.10289 | -0.00070 | .00400 | -0.00070 | 0.29 |
| 646: | 41 | 14 | 27 | 1 | 40 | 13 | 27 | 0 | 1294.10289 | -0.00070 | .00400 | -0.00070 | 0.21 |
| 647: | 41 | 14 | 28 | 1 | 40 | 13 | 27 | 0 | 1294.10289 | -0.00070 | .00400 | -0.00070 | 0.29 |
| 648: | 41 | 14 | 28 | 1 | 40 | 13 | 28 | 0 | 1294.10289 | -0.00070 | .00400 | -0.00070 | 0.21 |
| 649: | 46 | 14 | 33 | 1 | 45 | 13 | 32 | 0 | 1296.23813 | 0.00379  | .00400 | 0.00379  | 0.50 |
| 650: | 46 | 14 | 32 | 1 | 45 | 13 | 33 | 0 | 1296.23813 | 0.00378  | .00400 | 0.00379  | 0.50 |
| 651: | 48 | 14 | 35 | 1 | 47 | 13 | 34 | 0 | 1297.08287 | 0.00064  | .00400 | 0.00063  | 0.50 |
| 652: | 48 | 14 | 34 | 1 | 47 | 13 | 35 | 0 | 1297.08287 | 0.00062  | .00400 | 0.00063  | 0.50 |
| 653: | 50 | 14 | 36 | 1 | 49 | 13 | 37 | 0 | 1297.92820 | 0.00132  | .00400 | 0.00135  | 0.50 |
| 654: | 50 | 14 | 37 | 1 | 49 | 13 | 36 | 0 | 1297.92820 | 0.00137  | .00400 | 0.00135  | 0.50 |
| 655: | 15 | 15 | 1  | 1 | 14 | 14 | 0  | 0 | 1283.71810 | 0.00400  | .00400 | 0.00400  | 0.30 |
| 656: | 15 | 15 | 0  | 1 | 14 | 14 | 1  | 0 | 1283.71810 | 0.00400  | .00400 | 0.00400  | 0.30 |
| 657: | 15 | 15 | 0  | 1 | 14 | 14 | 0  | 0 | 1283.71810 | 0.00400  | .00400 | 0.00400  | 0.20 |
| 658: | 15 | 15 | 1  | 1 | 14 | 14 | 1  | 0 | 1283.71810 | 0.00400  | .00400 | 0.00400  | 0.20 |
| 659: | 16 | 15 | 2  | 1 | 15 | 14 | 2  | 0 | 1284.14031 | -0.00092 | .00400 | -0.00092 | 0.20 |
| 660: | 16 | 15 | 2  | 1 | 15 | 14 | 1  | 0 | 1284.14031 | -0.00092 | .00400 | -0.00092 | 0.30 |
| 661: | 16 | 15 | 1  | 1 | 15 | 14 | 2  | 0 | 1284.14031 | -0.00092 | .00400 | -0.00092 | 0.30 |
| 662: | 16 | 15 | 1  | 1 | 15 | 14 | 1  | 0 | 1284.14031 | -0.00092 | .00400 | -0.00092 | 0.20 |
| 663: | 17 | 15 | 2  | 1 | 16 | 14 | 2  | 0 | 1284.57265 | 0.00400  | .00400 | 0.00400  | 0.20 |
| 664: | 17 | 15 | 3  | 1 | 16 | 14 | 2  | 0 | 1284.57265 | 0.00400  | .00400 | 0.00400  | 0.30 |
| 665: | 17 | 15 | 3  | 1 | 16 | 14 | 3  | 0 | 1284.57265 | 0.00400  | .00400 | 0.00400  | 0.20 |
| 666: | 17 | 15 | 2  | 1 | 16 | 14 | 3  | 0 | 1284.57265 | 0.00400  | .00400 | 0.00400  | 0.30 |
| 667: | 18 | 15 | 4  | 1 | 17 | 14 | 3  | 0 | 1284.99572 | -0.00064 | .00400 | -0.00064 | 0.30 |
| 668: | 18 | 15 | 4  | 1 | 17 | 14 | 4  | 0 | 1284.99572 | -0.00064 | .00400 | -0.00064 | 0.20 |
| 669: | 18 | 15 | 3  | 1 | 17 | 14 | 4  | 0 | 1284.99572 | -0.00064 | .00400 | -0.00064 | 0.30 |
| 670: | 18 | 15 | 3  | 1 | 17 | 14 | 3  | 0 | 1284.99572 | -0.00064 | .00400 | -0.00064 | 0.20 |
| 671: | 19 | 15 | 4  | 1 | 18 | 14 | 4  | 0 | 1285.42444 | 0.00010  | .00400 | 0.00010  | 0.20 |
| 672: | 19 | 15 | 5  | 1 | 18 | 14 | 5  | 0 | 1285.42444 | 0.00010  | .00400 | 0.00010  | 0.20 |
| 673: | 19 | 15 | 5  | 1 | 18 | 14 | 4  | 0 | 1285.42444 | 0.00010  | .00400 | 0.00010  | 0.30 |
| 674: | 19 | 15 | 4  | 1 | 18 | 14 | 5  | 0 | 1285.42444 | 0.00010  | .00400 | 0.00010  | 0.30 |
| 675: | 20 | 15 | 5  | 1 | 19 | 14 | 5  | 0 | 1285.85114 | -0.00145 | .00400 | -0.00145 | 0.20 |
| 676: | 20 | 15 | 5  | 1 | 19 | 14 | 6  | 0 | 1285.85114 | -0.00145 | .00400 | -0.00145 | 0.30 |
| 677: | 20 | 15 | 6  | 1 | 19 | 14 | 5  | 0 | 1285.85114 | -0.00145 | .00400 | -0.00145 | 0.30 |
| 678: | 20 | 15 | 6  | 1 | 19 | 14 | 6  | 0 | 1285.85114 | -0.00145 | .00400 | -0.00145 | 0.20 |
| 679: | 21 | 15 | 7  | 1 | 20 | 14 | 6  | 0 | 1286.28071 | -0.00037 | .00400 | -0.00037 | 0.30 |
| 680: | 21 | 15 | 6  | 1 | 20 | 14 | 6  | 0 | 1286.28071 | -0.00037 | .00400 | -0.00037 | 0.20 |
| 681: | 21 | 15 | 6  | 1 | 20 | 14 | 7  | 0 | 1286.28071 | -0.00037 | .00400 | -0.00037 | 0.30 |
| 682: | 21 | 15 | 7  | 1 | 20 | 14 | 7  | 0 | 1286.28071 | -0.00037 | .00400 | -0.00037 | 0.20 |
| 683: | 22 | 15 | 8  | 1 | 21 | 14 | 8  | 0 | 1286.70854 | -0.00127 | .00400 | -0.00127 | 0.20 |
| 684: | 22 | 15 | 8  | 1 | 21 | 14 | 7  | 0 | 1286.70854 | -0.00127 | .00400 | -0.00127 | 0.30 |
| 685: | 22 | 15 | 7  | 1 | 21 | 14 | 8  | 0 | 1286.70854 | -0.00127 | .00400 | -0.00127 | 0.30 |
| 686: | 22 | 15 | 7  | 1 | 21 | 14 | 7  | 0 | 1286.70854 | -0.00127 | .00400 | -0.00127 | 0.20 |
| 687: | 23 | 15 | 9  | 1 | 22 | 14 | 8  | 0 | 1287.13678 | -0.00197 | .00400 | -0.00197 | 0.30 |
| 688: | 23 | 15 | 8  | 1 | 22 | 14 | 9  | 0 | 1287.13678 | -0.00197 | .00400 | -0.00197 | 0.30 |
| 689: | 23 | 15 | 8  | 1 | 22 | 14 | 8  | 0 | 1287.13678 | -0.00197 | .00400 | -0.00197 | 0.20 |
| 690: | 23 | 15 | 9  | 1 | 22 | 14 | 9  | 0 | 1287.13678 | -0.00197 | .00400 | -0.00197 | 0.20 |
| 691: | 24 | 15 | 10 | 1 | 23 | 14 | 9  | 0 | 1287.56770 | -0.00020 | .00400 | -0.00020 | 0.30 |
| 692: | 24 | 15 | 10 | 1 | 23 | 14 | 10 | 0 | 1287.56770 | -0.00020 | .00400 | -0.00020 | 0.20 |
| 693: | 24 | 15 | 9  | 1 | 23 | 14 | 10 | 0 | 1287.56770 | -0.00020 | .00400 | -0.00020 | 0.30 |
| 694: | 24 | 15 | 9  | 1 | 23 | 14 | 9  | 0 | 1287.56770 | -0.00020 | .00400 | -0.00020 | 0.20 |
| 695: | 41 | 15 | 27 | 1 | 40 | 14 | 26 | 0 | 1294.87142 | -0.00231 | .00400 | -0.00231 | 0.29 |

|      |    |    |    |   |    |    |    |   |            |          |        |          |      |
|------|----|----|----|---|----|----|----|---|------------|----------|--------|----------|------|
| 696: | 41 | 15 | 26 | 1 | 40 | 14 | 26 | 0 | 1294.87142 | -0.00231 | .00400 | -0.00231 | 0.21 |
| 697: | 41 | 15 | 26 | 1 | 40 | 14 | 27 | 0 | 1294.87142 | -0.00231 | .00400 | -0.00231 | 0.29 |
| 698: | 41 | 15 | 27 | 1 | 40 | 14 | 27 | 0 | 1294.87142 | -0.00231 | .00400 | -0.00231 | 0.21 |
| 699: | 45 | 15 | 30 | 1 | 44 | 14 | 31 | 0 | 1296.58598 | -0.00123 | .00400 | -0.00123 | 0.50 |
| 700: | 45 | 15 | 31 | 1 | 44 | 14 | 30 | 0 | 1296.58598 | -0.00123 | .00400 | -0.00123 | 0.50 |
| 701: | 47 | 15 | 32 | 1 | 46 | 14 | 33 | 0 | 1297.44104 | -0.00051 | .00400 | -0.00051 | 0.50 |
| 702: | 47 | 15 | 33 | 1 | 46 | 14 | 32 | 0 | 1297.44104 | -0.00051 | .00400 | -0.00051 | 0.50 |
| 703: | 48 | 15 | 33 | 1 | 47 | 14 | 34 | 0 | 1297.86727 | -0.00070 | .00400 | -0.00070 | 0.50 |
| 704: | 48 | 15 | 34 | 1 | 47 | 14 | 33 | 0 | 1297.86727 | -0.00070 | .00400 | -0.00070 | 0.50 |
| 705: | 16 | 16 | 1  | 1 | 15 | 15 | 0  | 0 | 1284.89739 | 0.00149  | .00400 | 0.00149  | 0.30 |
| 706: | 16 | 16 | 0  | 1 | 15 | 15 | 1  | 0 | 1284.89739 | 0.00149  | .00400 | 0.00149  | 0.30 |
| 707: | 16 | 16 | 0  | 1 | 15 | 15 | 0  | 0 | 1284.89739 | 0.00149  | .00400 | 0.00149  | 0.20 |
| 708: | 16 | 16 | 1  | 1 | 15 | 15 | 1  | 0 | 1284.89739 | 0.00149  | .00400 | 0.00149  | 0.20 |
| 709: | 17 | 16 | 2  | 1 | 16 | 15 | 2  | 0 | 1285.32549 | 0.00216  | .00400 | 0.00216  | 0.20 |
| 710: | 17 | 16 | 2  | 1 | 16 | 15 | 1  | 0 | 1285.32549 | 0.00216  | .00400 | 0.00216  | 0.30 |
| 711: | 17 | 16 | 1  | 1 | 16 | 15 | 2  | 0 | 1285.32549 | 0.00216  | .00400 | 0.00216  | 0.30 |
| 712: | 17 | 16 | 1  | 1 | 16 | 15 | 1  | 0 | 1285.32549 | 0.00216  | .00400 | 0.00216  | 0.20 |
| 713: | 18 | 16 | 3  | 1 | 17 | 15 | 2  | 0 | 1285.74979 | -0.00127 | .00400 | -0.00127 | 0.30 |
| 714: | 18 | 16 | 3  | 1 | 17 | 15 | 3  | 0 | 1285.74979 | -0.00127 | .00400 | -0.00127 | 0.20 |
| 715: | 18 | 16 | 2  | 1 | 17 | 15 | 2  | 0 | 1285.74979 | -0.00127 | .00400 | -0.00127 | 0.20 |
| 716: | 18 | 16 | 2  | 1 | 17 | 15 | 3  | 0 | 1285.74979 | -0.00127 | .00400 | -0.00127 | 0.30 |
| 717: | 19 | 16 | 4  | 1 | 18 | 15 | 3  | 0 | 1286.17797 | -0.00111 | .00400 | -0.00111 | 0.30 |
| 718: | 19 | 16 | 4  | 1 | 18 | 15 | 4  | 0 | 1286.17797 | -0.00111 | .00400 | -0.00111 | 0.20 |
| 719: | 19 | 16 | 3  | 1 | 18 | 15 | 3  | 0 | 1286.17797 | -0.00111 | .00400 | -0.00111 | 0.20 |
| 720: | 19 | 16 | 3  | 1 | 18 | 15 | 4  | 0 | 1286.17797 | -0.00111 | .00400 | -0.00111 | 0.30 |
| 721: | 20 | 16 | 4  | 1 | 19 | 15 | 4  | 0 | 1286.60604 | -0.00133 | .00400 | -0.00133 | 0.20 |
| 722: | 20 | 16 | 4  | 1 | 19 | 15 | 5  | 0 | 1286.60604 | -0.00133 | .00400 | -0.00133 | 0.30 |
| 723: | 20 | 16 | 5  | 1 | 19 | 15 | 4  | 0 | 1286.60604 | -0.00133 | .00400 | -0.00133 | 0.30 |
| 724: | 20 | 16 | 5  | 1 | 19 | 15 | 5  | 0 | 1286.60604 | -0.00133 | .00400 | -0.00133 | 0.20 |
| 725: | 21 | 16 | 5  | 1 | 20 | 15 | 5  | 0 | 1287.03716 | 0.00123  | .00400 | 0.00123  | 0.20 |
| 726: | 21 | 16 | 5  | 1 | 20 | 15 | 6  | 0 | 1287.03716 | 0.00123  | .00400 | 0.00123  | 0.30 |
| 727: | 21 | 16 | 6  | 1 | 20 | 15 | 5  | 0 | 1287.03716 | 0.00123  | .00400 | 0.00123  | 0.30 |
| 728: | 21 | 16 | 6  | 1 | 20 | 15 | 6  | 0 | 1287.03716 | 0.00123  | .00400 | 0.00123  | 0.20 |
| 729: | 22 | 16 | 6  | 1 | 21 | 15 | 6  | 0 | 1287.46385 | -0.00089 | .00400 | -0.00089 | 0.20 |
| 730: | 22 | 16 | 6  | 1 | 21 | 15 | 7  | 0 | 1287.46385 | -0.00089 | .00400 | -0.00089 | 0.30 |
| 731: | 22 | 16 | 7  | 1 | 21 | 15 | 6  | 0 | 1287.46385 | -0.00089 | .00400 | -0.00089 | 0.30 |
| 732: | 22 | 16 | 7  | 1 | 21 | 15 | 7  | 0 | 1287.46385 | -0.00089 | .00400 | -0.00089 | 0.20 |
| 733: | 23 | 16 | 7  | 1 | 22 | 15 | 8  | 0 | 1287.89507 | 0.00129  | .00400 | 0.00129  | 0.30 |
| 734: | 23 | 16 | 8  | 1 | 22 | 15 | 8  | 0 | 1287.89507 | 0.00129  | .00400 | 0.00129  | 0.20 |
| 735: | 23 | 16 | 8  | 1 | 22 | 15 | 7  | 0 | 1287.89507 | 0.00129  | .00400 | 0.00129  | 0.30 |
| 736: | 23 | 16 | 7  | 1 | 22 | 15 | 7  | 0 | 1287.89507 | 0.00129  | .00400 | 0.00129  | 0.20 |
| 737: | 24 | 16 | 8  | 1 | 23 | 15 | 8  | 0 | 1288.32393 | 0.00088  | .00400 | 0.00088  | 0.20 |
| 738: | 24 | 16 | 9  | 1 | 23 | 15 | 9  | 0 | 1288.32393 | 0.00088  | .00400 | 0.00088  | 0.20 |
| 739: | 24 | 16 | 9  | 1 | 23 | 15 | 8  | 0 | 1288.32393 | 0.00088  | .00400 | 0.00088  | 0.30 |
| 740: | 24 | 16 | 8  | 1 | 23 | 15 | 9  | 0 | 1288.32393 | 0.00088  | .00400 | 0.00088  | 0.30 |
| 741: | 25 | 16 | 9  | 1 | 24 | 15 | 9  | 0 | 1288.75194 | -0.00059 | .00400 | -0.00059 | 0.20 |
| 742: | 25 | 16 | 10 | 1 | 24 | 15 | 10 | 0 | 1288.75194 | -0.00059 | .00400 | -0.00059 | 0.20 |
| 743: | 25 | 16 | 9  | 1 | 24 | 15 | 10 | 0 | 1288.75194 | -0.00059 | .00400 | -0.00059 | 0.30 |
| 744: | 25 | 16 | 10 | 1 | 24 | 15 | 9  | 0 | 1288.75194 | -0.00059 | .00400 | -0.00059 | 0.30 |
| 745: | 26 | 16 | 10 | 1 | 25 | 15 | 10 | 0 | 1289.18088 | -0.00133 | .00400 | -0.00133 | 0.20 |
| 746: | 26 | 16 | 10 | 1 | 25 | 15 | 11 | 0 | 1289.18088 | -0.00133 | .00400 | -0.00133 | 0.30 |
| 747: | 26 | 16 | 11 | 1 | 25 | 15 | 11 | 0 | 1289.18088 | -0.00133 | .00400 | -0.00133 | 0.20 |
| 748: | 26 | 16 | 11 | 1 | 25 | 15 | 10 | 0 | 1289.18088 | -0.00133 | .00400 | -0.00133 | 0.30 |
| 749: | 27 | 16 | 11 | 1 | 26 | 15 | 11 | 0 | 1289.61020 | -0.00186 | .00400 | -0.00186 | 0.20 |
| 750: | 27 | 16 | 11 | 1 | 26 | 15 | 12 | 0 | 1289.61020 | -0.00186 | .00400 | -0.00186 | 0.30 |
| 751: | 27 | 16 | 12 | 1 | 26 | 15 | 12 | 0 | 1289.61020 | -0.00186 | .00400 | -0.00186 | 0.20 |
| 752: | 27 | 16 | 12 | 1 | 26 | 15 | 11 | 0 | 1289.61020 | -0.00186 | .00400 | -0.00186 | 0.30 |
| 753: | 28 | 16 | 12 | 1 | 27 | 15 | 13 | 0 | 1290.03948 | -0.00260 | .00400 | -0.00260 | 0.30 |
| 754: | 28 | 16 | 12 | 1 | 27 | 15 | 12 | 0 | 1290.03948 | -0.00260 | .00400 | -0.00260 | 0.20 |
| 755: | 28 | 16 | 13 | 1 | 27 | 15 | 13 | 0 | 1290.03948 | -0.00260 | .00400 | -0.00260 | 0.20 |
| 756: | 28 | 16 | 13 | 1 | 27 | 15 | 12 | 0 | 1290.03948 | -0.00260 | .00400 | -0.00260 | 0.30 |
| 757: | 30 | 16 | 14 | 1 | 29 | 15 | 15 | 0 | 1290.90090 | -0.00162 | .00400 | -0.00162 | 0.30 |
| 758: | 30 | 16 | 14 | 1 | 29 | 15 | 14 | 0 | 1290.90090 | -0.00162 | .00400 | -0.00162 | 0.20 |
| 759: | 30 | 16 | 15 | 1 | 29 | 15 | 15 | 0 | 1290.90090 | -0.00162 | .00400 | -0.00162 | 0.20 |
| 760: | 30 | 16 | 15 | 1 | 29 | 15 | 14 | 0 | 1290.90090 | -0.00162 | .00400 | -0.00162 | 0.30 |
| 761: | 31 | 16 | 16 | 1 | 30 | 15 | 16 | 0 | 1291.33538 | 0.00246  | .00400 | 0.00246  | 0.20 |
| 762: | 31 | 16 | 16 | 1 | 30 | 15 | 15 | 0 | 1291.33538 | 0.00246  | .00400 | 0.00246  | 0.30 |
| 763: | 31 | 16 | 15 | 1 | 30 | 15 | 16 | 0 | 1291.33538 | 0.00246  | .00400 | 0.00246  | 0.30 |
| 764: | 31 | 16 | 15 | 1 | 30 | 15 | 15 | 0 | 1291.33538 | 0.00246  | .00400 | 0.00246  | 0.20 |
| 765: | 32 | 16 | 16 | 1 | 31 | 15 | 17 | 0 | 1291.76272 | -0.00068 | .00400 | -0.00068 | 0.30 |
| 766: | 32 | 16 | 16 | 1 | 31 | 15 | 16 | 0 | 1291.76272 | -0.00068 | .00400 | -0.00068 | 0.20 |
| 767: | 32 | 16 | 17 | 1 | 31 | 15 | 17 | 0 | 1291.76272 | -0.00068 | .00400 | -0.00068 | 0.20 |
| 768: | 32 | 16 | 17 | 1 | 31 | 15 | 16 | 0 | 1291.76272 | -0.00068 | .00400 | -0.00068 | 0.30 |
| 769: | 33 | 16 | 18 | 1 | 32 | 15 | 18 | 0 | 1292.19335 | -0.00060 | .00400 | -0.00060 | 0.20 |
| 770: | 33 | 16 | 17 | 1 | 32 | 15 | 17 | 0 | 1292.19335 | -0.00060 | .00400 | -0.00060 | 0.20 |
| 771: | 33 | 16 | 17 | 1 | 32 | 15 | 18 | 0 | 1292.19335 | -0.00060 | .00400 | -0.00060 | 0.30 |
| 772: | 33 | 16 | 18 | 1 | 32 | 15 | 17 | 0 | 1292.19335 | -0.00060 | .00400 | -0.00060 | 0.30 |
| 773: | 34 | 16 | 18 | 1 | 33 | 15 | 19 | 0 | 1292.62175 | -0.00279 | .00400 | -0.00279 | 0.30 |

|      |    |    |    |   |    |    |    |   |            |          |        |          |      |
|------|----|----|----|---|----|----|----|---|------------|----------|--------|----------|------|
| 774: | 34 | 16 | 19 | 1 | 33 | 15 | 18 | 0 | 1292.62175 | -0.00279 | .00400 | -0.00279 | 0.30 |
| 775: | 34 | 16 | 19 | 1 | 33 | 15 | 19 | 0 | 1292.62175 | -0.00279 | .00400 | -0.00279 | 0.20 |
| 776: | 34 | 16 | 18 | 1 | 33 | 15 | 18 | 0 | 1292.62175 | -0.00279 | .00400 | -0.00279 | 0.20 |
| 777: | 35 | 16 | 20 | 1 | 34 | 15 | 19 | 0 | 1293.05161 | -0.00355 | .00400 | -0.00355 | 0.30 |
| 778: | 35 | 16 | 19 | 1 | 34 | 15 | 20 | 0 | 1293.05161 | -0.00355 | .00400 | -0.00355 | 0.30 |
| 779: | 35 | 16 | 20 | 1 | 34 | 15 | 20 | 0 | 1293.05161 | -0.00355 | .00400 | -0.00355 | 0.20 |
| 780: | 35 | 16 | 19 | 1 | 34 | 15 | 19 | 0 | 1293.05161 | -0.00355 | .00400 | -0.00355 | 0.20 |
| 781: | 36 | 16 | 20 | 1 | 35 | 15 | 20 | 0 | 1293.48840 | 0.00262  | .00400 | 0.00262  | 0.20 |
| 782: | 36 | 16 | 20 | 1 | 35 | 15 | 21 | 0 | 1293.48840 | 0.00262  | .00400 | 0.00262  | 0.30 |
| 783: | 36 | 16 | 21 | 1 | 35 | 15 | 20 | 0 | 1293.48840 | 0.00262  | .00400 | 0.00262  | 0.30 |
| 784: | 36 | 16 | 21 | 1 | 35 | 15 | 21 | 0 | 1293.48840 | 0.00262  | .00400 | 0.00262  | 0.20 |
| 785: | 37 | 16 | 22 | 1 | 36 | 15 | 22 | 0 | 1293.91235 | -0.00402 | .00400 | -0.00402 | 0.20 |
| 786: | 37 | 16 | 22 | 1 | 36 | 15 | 21 | 0 | 1293.91235 | -0.00402 | .00400 | -0.00402 | 0.30 |
| 787: | 37 | 16 | 21 | 1 | 36 | 15 | 21 | 0 | 1293.91235 | -0.00402 | .00400 | -0.00402 | 0.20 |
| 788: | 37 | 16 | 21 | 1 | 36 | 15 | 22 | 0 | 1293.91235 | -0.00402 | .00400 | -0.00402 | 0.30 |
| 789: | 38 | 16 | 22 | 1 | 37 | 15 | 22 | 0 | 1294.34827 | 0.00136  | .00400 | 0.00136  | 0.20 |
| 790: | 38 | 16 | 22 | 1 | 37 | 15 | 23 | 0 | 1294.34827 | 0.00136  | .00400 | 0.00136  | 0.30 |
| 791: | 38 | 16 | 23 | 1 | 37 | 15 | 22 | 0 | 1294.34827 | 0.00136  | .00400 | 0.00136  | 0.30 |
| 792: | 38 | 16 | 23 | 1 | 37 | 15 | 23 | 0 | 1294.34827 | 0.00136  | .00400 | 0.00136  | 0.20 |
| 793: | 39 | 16 | 24 | 1 | 38 | 15 | 24 | 0 | 1294.77627 | -0.00111 | .00400 | -0.00111 | 0.20 |
| 794: | 39 | 16 | 23 | 1 | 38 | 15 | 24 | 0 | 1294.77627 | -0.00111 | .00400 | -0.00111 | 0.30 |
| 795: | 39 | 16 | 23 | 1 | 38 | 15 | 23 | 0 | 1294.77627 | -0.00111 | .00400 | -0.00111 | 0.20 |
| 796: | 39 | 16 | 24 | 1 | 38 | 15 | 23 | 0 | 1294.77627 | -0.00111 | .00400 | -0.00111 | 0.30 |
| 797: | 40 | 16 | 25 | 1 | 39 | 15 | 24 | 0 | 1295.20759 | -0.00015 | .00400 | -0.00015 | 0.30 |
| 798: | 40 | 16 | 24 | 1 | 39 | 15 | 24 | 0 | 1295.20759 | -0.00015 | .00400 | -0.00015 | 0.20 |
| 799: | 40 | 16 | 24 | 1 | 39 | 15 | 25 | 0 | 1295.20759 | -0.00015 | .00400 | -0.00015 | 0.30 |
| 800: | 40 | 16 | 25 | 1 | 39 | 15 | 25 | 0 | 1295.20759 | -0.00015 | .00400 | -0.00015 | 0.20 |
| 801: | 41 | 16 | 25 | 1 | 40 | 15 | 26 | 0 | 1295.63555 | -0.00243 | .00400 | -0.00243 | 0.30 |
| 802: | 41 | 16 | 25 | 1 | 40 | 15 | 25 | 0 | 1295.63555 | -0.00243 | .00400 | -0.00243 | 0.20 |
| 803: | 41 | 16 | 26 | 1 | 40 | 15 | 26 | 0 | 1295.63555 | -0.00243 | .00400 | -0.00243 | 0.20 |
| 804: | 41 | 16 | 26 | 1 | 40 | 15 | 25 | 0 | 1295.63555 | -0.00243 | .00400 | -0.00243 | 0.30 |
| 805: | 42 | 16 | 26 | 1 | 41 | 15 | 27 | 0 | 1296.06977 | 0.00172  | .00400 | 0.00172  | 0.50 |
| 806: | 42 | 16 | 27 | 1 | 41 | 15 | 26 | 0 | 1296.06977 | 0.00172  | .00400 | 0.00172  | 0.50 |
| 807: | 43 | 16 | 28 | 1 | 42 | 15 | 27 | 0 | 1296.49753 | -0.00041 | .00400 | -0.00041 | 0.50 |
| 808: | 43 | 16 | 27 | 1 | 42 | 15 | 28 | 0 | 1296.49753 | -0.00041 | .00400 | -0.00041 | 0.50 |
| 809: | 48 | 16 | 32 | 1 | 47 | 15 | 33 | 0 | 1298.64187 | -0.00151 | .00400 | -0.00151 | 0.50 |
| 810: | 48 | 16 | 33 | 1 | 47 | 15 | 32 | 0 | 1298.64187 | -0.00151 | .00400 | -0.00151 | 0.50 |
| 811: | 49 | 16 | 33 | 1 | 48 | 15 | 34 | 0 | 1299.07344 | 0.00201  | .00400 | 0.00201  | 0.50 |
| 812: | 49 | 16 | 34 | 1 | 48 | 15 | 33 | 0 | 1299.07344 | 0.00201  | .00400 | 0.00201  | 0.50 |
| 813: | 50 | 16 | 35 | 1 | 49 | 15 | 34 | 0 | 1299.50348 | 0.00445  | .00400 | 0.00445  | 0.50 |
| 814: | 50 | 16 | 34 | 1 | 49 | 15 | 35 | 0 | 1299.50348 | 0.00445  | .00400 | 0.00445  | 0.50 |
| 815: | 17 | 17 | 1  | 1 | 16 | 16 | 1  | 0 | 1286.07322 | -0.00265 | .00400 | -0.00265 | 0.20 |
| 816: | 17 | 17 | 0  | 1 | 16 | 16 | 0  | 0 | 1286.07322 | -0.00265 | .00400 | -0.00265 | 0.20 |
| 817: | 17 | 17 | 0  | 1 | 16 | 16 | 1  | 0 | 1286.07322 | -0.00265 | .00400 | -0.00265 | 0.30 |
| 818: | 17 | 17 | 1  | 1 | 16 | 16 | 0  | 0 | 1286.07322 | -0.00265 | .00400 | -0.00265 | 0.30 |
| 819: | 18 | 17 | 2  | 1 | 17 | 16 | 1  | 0 | 1286.50612 | 0.00251  | .00400 | 0.00251  | 0.30 |
| 820: | 18 | 17 | 2  | 1 | 17 | 16 | 2  | 0 | 1286.50612 | 0.00251  | .00400 | 0.00251  | 0.20 |
| 821: | 18 | 17 | 1  | 1 | 17 | 16 | 2  | 0 | 1286.50612 | 0.00251  | .00400 | 0.00251  | 0.30 |
| 822: | 18 | 17 | 1  | 1 | 17 | 16 | 1  | 0 | 1286.50612 | 0.00251  | .00400 | 0.00251  | 0.20 |
| 823: | 19 | 17 | 3  | 1 | 18 | 16 | 3  | 0 | 1286.93067 | -0.00098 | .00400 | -0.00098 | 0.20 |
| 824: | 19 | 17 | 2  | 1 | 18 | 16 | 3  | 0 | 1286.93067 | -0.00098 | .00400 | -0.00098 | 0.30 |
| 825: | 19 | 17 | 3  | 1 | 18 | 16 | 2  | 0 | 1286.93067 | -0.00098 | .00400 | -0.00098 | 0.30 |
| 826: | 19 | 17 | 2  | 1 | 18 | 16 | 2  | 0 | 1286.93067 | -0.00098 | .00400 | -0.00098 | 0.20 |
| 827: | 20 | 17 | 3  | 1 | 19 | 16 | 4  | 0 | 1287.35900 | -0.00097 | .00400 | -0.00097 | 0.30 |
| 828: | 20 | 17 | 3  | 1 | 19 | 16 | 3  | 0 | 1287.35900 | -0.00097 | .00400 | -0.00097 | 0.20 |
| 829: | 20 | 17 | 4  | 1 | 19 | 16 | 4  | 0 | 1287.35900 | -0.00097 | .00400 | -0.00097 | 0.20 |
| 830: | 20 | 17 | 4  | 1 | 19 | 16 | 3  | 0 | 1287.35900 | -0.00097 | .00400 | -0.00097 | 0.30 |
| 831: | 21 | 17 | 5  | 1 | 20 | 16 | 5  | 0 | 1287.78429 | -0.00428 | .00400 | -0.00428 | 0.20 |
| 832: | 21 | 17 | 5  | 1 | 20 | 16 | 4  | 0 | 1287.78429 | -0.00428 | .00400 | -0.00428 | 0.30 |
| 833: | 21 | 17 | 4  | 1 | 20 | 16 | 5  | 0 | 1287.78429 | -0.00428 | .00400 | -0.00428 | 0.30 |
| 834: | 21 | 17 | 4  | 1 | 20 | 16 | 4  | 0 | 1287.78429 | -0.00428 | .00400 | -0.00428 | 0.20 |
| 835: | 22 | 17 | 5  | 1 | 21 | 16 | 6  | 0 | 1288.21635 | -0.00108 | .00400 | -0.00108 | 0.30 |
| 836: | 22 | 17 | 5  | 1 | 21 | 16 | 5  | 0 | 1288.21635 | -0.00108 | .00400 | -0.00108 | 0.20 |
| 837: | 22 | 17 | 6  | 1 | 21 | 16 | 6  | 0 | 1288.21635 | -0.00108 | .00400 | -0.00108 | 0.20 |
| 838: | 22 | 17 | 6  | 1 | 21 | 16 | 5  | 0 | 1288.21635 | -0.00108 | .00400 | -0.00108 | 0.30 |
| 839: | 23 | 17 | 7  | 1 | 22 | 16 | 7  | 0 | 1288.64551 | -0.00103 | .00400 | -0.00103 | 0.20 |
| 840: | 23 | 17 | 6  | 1 | 22 | 16 | 6  | 0 | 1288.64551 | -0.00103 | .00400 | -0.00103 | 0.20 |
| 841: | 23 | 17 | 6  | 1 | 22 | 16 | 7  | 0 | 1288.64551 | -0.00103 | .00400 | -0.00103 | 0.30 |
| 842: | 23 | 17 | 7  | 1 | 22 | 16 | 6  | 0 | 1288.64551 | -0.00103 | .00400 | -0.00103 | 0.30 |
| 843: | 24 | 17 | 7  | 1 | 23 | 16 | 8  | 0 | 1289.07445 | -0.00145 | .00400 | -0.00145 | 0.30 |
| 844: | 24 | 17 | 7  | 1 | 23 | 16 | 7  | 0 | 1289.07445 | -0.00145 | .00400 | -0.00145 | 0.20 |
| 845: | 24 | 17 | 8  | 1 | 23 | 16 | 8  | 0 | 1289.07445 | -0.00145 | .00400 | -0.00145 | 0.20 |
| 846: | 24 | 17 | 8  | 1 | 23 | 16 | 7  | 0 | 1289.07445 | -0.00145 | .00400 | -0.00145 | 0.30 |
| 847: | 25 | 17 | 9  | 1 | 24 | 16 | 8  | 0 | 1289.50640 | 0.00091  | .00400 | 0.00091  | 0.30 |
| 848: | 25 | 17 | 9  | 1 | 24 | 16 | 9  | 0 | 1289.50640 | 0.00091  | .00400 | 0.00091  | 0.20 |
| 849: | 25 | 17 | 8  | 1 | 24 | 16 | 8  | 0 | 1289.50640 | 0.00091  | .00400 | 0.00091  | 0.20 |
| 850: | 25 | 17 | 8  | 1 | 24 | 16 | 9  | 0 | 1289.50640 | 0.00091  | .00400 | 0.00091  | 0.30 |
| 851: | 26 | 17 | 9  | 1 | 25 | 16 | 9  | 0 | 1289.93650 | 0.00121  | .00400 | 0.00121  | 0.20 |

|      |    |    |    |   |    |    |    |   |            |          |        |          |      |
|------|----|----|----|---|----|----|----|---|------------|----------|--------|----------|------|
| 852: | 26 | 17 | 10 | 1 | 25 | 16 | 10 | 0 | 1289.93650 | 0.00121  | .00400 | 0.00121  | 0.20 |
| 853: | 26 | 17 | 10 | 1 | 25 | 16 | 9  | 0 | 1289.93650 | 0.00121  | .00400 | 0.00121  | 0.30 |
| 854: | 26 | 17 | 9  | 1 | 25 | 16 | 10 | 0 | 1289.93650 | 0.00121  | .00400 | 0.00121  | 0.30 |
| 855: | 27 | 17 | 11 | 1 | 26 | 16 | 11 | 0 | 1290.36743 | 0.00214  | .00400 | 0.00214  | 0.20 |
| 856: | 27 | 17 | 11 | 1 | 26 | 16 | 10 | 0 | 1290.36743 | 0.00214  | .00400 | 0.00214  | 0.30 |
| 857: | 27 | 17 | 10 | 1 | 26 | 16 | 11 | 0 | 1290.36743 | 0.00214  | .00400 | 0.00214  | 0.30 |
| 858: | 27 | 17 | 10 | 1 | 26 | 16 | 10 | 0 | 1290.36743 | 0.00214  | .00400 | 0.00214  | 0.20 |
| 859: | 28 | 17 | 11 | 1 | 27 | 16 | 11 | 0 | 1290.79296 | -0.00253 | .00400 | -0.00253 | 0.20 |
| 860: | 28 | 17 | 11 | 1 | 27 | 16 | 12 | 0 | 1290.79296 | -0.00253 | .00400 | -0.00253 | 0.30 |
| 861: | 28 | 17 | 12 | 1 | 27 | 16 | 11 | 0 | 1290.79296 | -0.00253 | .00400 | -0.00253 | 0.30 |
| 862: | 28 | 17 | 12 | 1 | 27 | 16 | 12 | 0 | 1290.79296 | -0.00253 | .00400 | -0.00253 | 0.20 |
| 863: | 29 | 17 | 13 | 1 | 28 | 16 | 12 | 0 | 1291.22471 | -0.00114 | .00400 | -0.00115 | 0.30 |
| 864: | 29 | 17 | 13 | 1 | 28 | 16 | 13 | 0 | 1291.22471 | -0.00114 | .00400 | -0.00115 | 0.20 |
| 865: | 29 | 17 | 12 | 1 | 28 | 16 | 13 | 0 | 1291.22471 | -0.00114 | .00400 | -0.00115 | 0.30 |
| 866: | 29 | 17 | 12 | 1 | 28 | 16 | 12 | 0 | 1291.22471 | -0.00114 | .00400 | -0.00115 | 0.20 |
| 867: | 30 | 17 | 13 | 1 | 29 | 16 | 13 | 0 | 1291.65497 | -0.00141 | .00400 | -0.00141 | 0.20 |
| 868: | 30 | 17 | 13 | 1 | 29 | 16 | 14 | 0 | 1291.65497 | -0.00141 | .00400 | -0.00141 | 0.30 |
| 869: | 30 | 17 | 14 | 1 | 29 | 16 | 13 | 0 | 1291.65497 | -0.00141 | .00400 | -0.00141 | 0.30 |
| 870: | 30 | 17 | 14 | 1 | 29 | 16 | 14 | 0 | 1291.65497 | -0.00141 | .00400 | -0.00141 | 0.20 |
| 871: | 31 | 17 | 15 | 1 | 30 | 16 | 15 | 0 | 1292.08586 | -0.00119 | .00400 | -0.00119 | 0.20 |
| 872: | 31 | 17 | 15 | 1 | 30 | 16 | 14 | 0 | 1292.08586 | -0.00119 | .00400 | -0.00119 | 0.30 |
| 873: | 31 | 17 | 14 | 1 | 30 | 16 | 14 | 0 | 1292.08586 | -0.00119 | .00400 | -0.00119 | 0.20 |
| 874: | 31 | 17 | 14 | 1 | 30 | 16 | 15 | 0 | 1292.08586 | -0.00119 | .00400 | -0.00119 | 0.30 |
| 875: | 33 | 17 | 17 | 1 | 32 | 16 | 17 | 0 | 1292.94731 | -0.00143 | .00400 | -0.00143 | 0.20 |
| 876: | 33 | 17 | 17 | 1 | 32 | 16 | 16 | 0 | 1292.94731 | -0.00143 | .00400 | -0.00143 | 0.30 |
| 877: | 33 | 17 | 16 | 1 | 32 | 16 | 17 | 0 | 1292.94731 | -0.00143 | .00400 | -0.00143 | 0.30 |
| 878: | 33 | 17 | 16 | 1 | 32 | 16 | 16 | 0 | 1292.94731 | -0.00143 | .00400 | -0.00143 | 0.20 |
| 879: | 34 | 17 | 18 | 1 | 33 | 16 | 17 | 0 | 1293.37902 | -0.00071 | .00400 | -0.00071 | 0.30 |
| 880: | 34 | 17 | 18 | 1 | 33 | 16 | 18 | 0 | 1293.37902 | -0.00071 | .00400 | -0.00071 | 0.20 |
| 881: | 34 | 17 | 17 | 1 | 33 | 16 | 18 | 0 | 1293.37902 | -0.00071 | .00400 | -0.00071 | 0.30 |
| 882: | 34 | 17 | 17 | 1 | 33 | 16 | 17 | 0 | 1293.37902 | -0.00071 | .00400 | -0.00071 | 0.20 |
| 883: | 35 | 17 | 19 | 1 | 34 | 16 | 18 | 0 | 1293.80699 | -0.00380 | .00400 | -0.00380 | 0.30 |
| 884: | 35 | 17 | 19 | 1 | 34 | 16 | 19 | 0 | 1293.80699 | -0.00380 | .00400 | -0.00380 | 0.20 |
| 885: | 35 | 17 | 18 | 1 | 34 | 16 | 19 | 0 | 1293.80699 | -0.00380 | .00400 | -0.00380 | 0.30 |
| 886: | 35 | 17 | 18 | 1 | 34 | 16 | 18 | 0 | 1293.80699 | -0.00380 | .00400 | -0.00380 | 0.20 |
| 887: | 36 | 17 | 19 | 1 | 35 | 16 | 19 | 0 | 1294.23686 | -0.00504 | .00400 | -0.00504 | 0.20 |
| 888: | 36 | 17 | 19 | 1 | 35 | 16 | 20 | 0 | 1294.23686 | -0.00504 | .00400 | -0.00504 | 0.30 |
| 889: | 36 | 17 | 20 | 1 | 35 | 16 | 19 | 0 | 1294.23686 | -0.00504 | .00400 | -0.00504 | 0.30 |
| 890: | 36 | 17 | 20 | 1 | 35 | 16 | 20 | 0 | 1294.23686 | -0.00504 | .00400 | -0.00504 | 0.20 |
| 891: | 37 | 17 | 20 | 1 | 36 | 16 | 21 | 0 | 1294.67262 | -0.00042 | .00400 | -0.00043 | 0.30 |
| 892: | 37 | 17 | 21 | 1 | 36 | 16 | 21 | 0 | 1294.67262 | -0.00042 | .00400 | -0.00043 | 0.20 |
| 893: | 37 | 17 | 20 | 1 | 36 | 16 | 20 | 0 | 1294.67262 | -0.00042 | .00400 | -0.00043 | 0.20 |
| 894: | 37 | 17 | 21 | 1 | 36 | 16 | 20 | 0 | 1294.67262 | -0.00042 | .00400 | -0.00043 | 0.30 |
| 895: | 38 | 17 | 21 | 1 | 37 | 16 | 21 | 0 | 1295.10505 | 0.00085  | .00400 | 0.00085  | 0.20 |
| 896: | 38 | 17 | 22 | 1 | 37 | 16 | 22 | 0 | 1295.10505 | 0.00085  | .00400 | 0.00085  | 0.20 |
| 897: | 38 | 17 | 21 | 1 | 37 | 16 | 22 | 0 | 1295.10505 | 0.00085  | .00400 | 0.00085  | 0.30 |
| 898: | 38 | 17 | 22 | 1 | 37 | 16 | 21 | 0 | 1295.10505 | 0.00085  | .00400 | 0.00085  | 0.30 |
| 899: | 39 | 17 | 22 | 1 | 38 | 16 | 22 | 0 | 1295.53493 | -0.00041 | .00400 | -0.00041 | 0.20 |
| 900: | 39 | 17 | 22 | 1 | 38 | 16 | 23 | 0 | 1295.53493 | -0.00041 | .00400 | -0.00041 | 0.30 |
| 901: | 39 | 17 | 23 | 1 | 38 | 16 | 22 | 0 | 1295.53493 | -0.00041 | .00400 | -0.00041 | 0.30 |
| 902: | 39 | 17 | 23 | 1 | 38 | 16 | 23 | 0 | 1295.53493 | -0.00041 | .00400 | -0.00041 | 0.20 |
| 903: | 40 | 17 | 23 | 1 | 39 | 16 | 23 | 0 | 1295.96144 | -0.00501 | .00400 | -0.00501 | 0.20 |
| 904: | 40 | 17 | 23 | 1 | 39 | 16 | 24 | 0 | 1295.96144 | -0.00501 | .00400 | -0.00501 | 0.30 |
| 905: | 40 | 17 | 24 | 1 | 39 | 16 | 23 | 0 | 1295.96144 | -0.00501 | .00400 | -0.00501 | 0.30 |
| 906: | 40 | 17 | 24 | 1 | 39 | 16 | 24 | 0 | 1295.96144 | -0.00501 | .00400 | -0.00501 | 0.20 |
| 907: | 41 | 17 | 25 | 1 | 40 | 16 | 24 | 0 | 1296.39889 | 0.00139  | .00400 | 0.00139  | 0.50 |
| 908: | 41 | 17 | 24 | 1 | 40 | 16 | 25 | 0 | 1296.39889 | 0.00139  | .00400 | 0.00139  | 0.50 |
| 909: | 43 | 17 | 26 | 1 | 42 | 16 | 27 | 0 | 1297.25722 | -0.00211 | .00400 | -0.00211 | 0.50 |
| 910: | 43 | 17 | 27 | 1 | 42 | 16 | 26 | 0 | 1297.25722 | -0.00211 | .00400 | -0.00211 | 0.50 |
| 911: | 45 | 17 | 28 | 1 | 44 | 16 | 29 | 0 | 1298.12336 | 0.00273  | .00400 | 0.00273  | 0.50 |
| 912: | 45 | 17 | 29 | 1 | 44 | 16 | 28 | 0 | 1298.12336 | 0.00273  | .00400 | 0.00273  | 0.50 |
| 913: | 46 | 17 | 30 | 1 | 45 | 16 | 29 | 0 | 1298.54872 | -0.00230 | .00400 | -0.00230 | 0.50 |
| 914: | 46 | 17 | 29 | 1 | 45 | 16 | 30 | 0 | 1298.54872 | -0.00230 | .00400 | -0.00230 | 0.50 |
| 915: | 47 | 17 | 30 | 1 | 46 | 16 | 31 | 0 | 1298.97895 | -0.00224 | .00400 | -0.00224 | 0.50 |
| 916: | 47 | 17 | 31 | 1 | 46 | 16 | 30 | 0 | 1298.97895 | -0.00224 | .00400 | -0.00224 | 0.50 |
| 917: | 48 | 17 | 31 | 1 | 47 | 16 | 32 | 0 | 1299.41003 | -0.00109 | .00400 | -0.00109 | 0.50 |
| 918: | 48 | 17 | 32 | 1 | 47 | 16 | 31 | 0 | 1299.41003 | -0.00109 | .00400 | -0.00109 | 0.50 |
| 919: | 18 | 18 | 1  | 1 | 17 | 17 | 1  | 0 | 1287.25265 | -0.00128 | .00400 | -0.00128 | 0.20 |
| 920: | 18 | 18 | 0  | 1 | 17 | 17 | 0  | 0 | 1287.25265 | -0.00128 | .00400 | -0.00128 | 0.20 |
| 921: | 18 | 18 | 1  | 1 | 17 | 17 | 0  | 0 | 1287.25265 | -0.00128 | .00400 | -0.00128 | 0.30 |
| 922: | 18 | 18 | 0  | 1 | 17 | 17 | 1  | 0 | 1287.25265 | -0.00128 | .00400 | -0.00128 | 0.30 |
| 923: | 19 | 18 | 1  | 1 | 18 | 17 | 2  | 0 | 1287.67938 | -0.00260 | .00400 | -0.00260 | 0.30 |
| 924: | 19 | 18 | 1  | 1 | 18 | 17 | 1  | 0 | 1287.67938 | -0.00260 | .00400 | -0.00260 | 0.20 |
| 925: | 19 | 18 | 2  | 1 | 18 | 17 | 1  | 0 | 1287.67938 | -0.00260 | .00400 | -0.00260 | 0.30 |
| 926: | 19 | 18 | 2  | 1 | 18 | 17 | 2  | 0 | 1287.67938 | -0.00260 | .00400 | -0.00260 | 0.20 |
| 927: | 20 | 18 | 2  | 1 | 19 | 17 | 2  | 0 | 1288.11020 | -0.00012 | .00400 | -0.00012 | 0.20 |
| 928: | 20 | 18 | 3  | 1 | 19 | 17 | 3  | 0 | 1288.11020 | -0.00012 | .00400 | -0.00012 | 0.20 |
| 929: | 20 | 18 | 3  | 1 | 19 | 17 | 2  | 0 | 1288.11020 | -0.00012 | .00400 | -0.00012 | 0.30 |

|       |    |    |    |   |    |    |    |   |            |          |        |          |      |
|-------|----|----|----|---|----|----|----|---|------------|----------|--------|----------|------|
| 930:  | 20 | 18 | 2  | 1 | 19 | 17 | 3  | 0 | 1288.11020 | -0.00012 | .00400 | -0.00012 | 0.30 |
| 931:  | 21 | 18 | 4  | 1 | 20 | 17 | 4  | 0 | 1288.53886 | -0.00008 | .00400 | -0.00008 | 0.20 |
| 932:  | 21 | 18 | 4  | 1 | 20 | 17 | 3  | 0 | 1288.53886 | -0.00008 | .00400 | -0.00008 | 0.30 |
| 933:  | 21 | 18 | 3  | 1 | 20 | 17 | 4  | 0 | 1288.53886 | -0.00008 | .00400 | -0.00008 | 0.30 |
| 934:  | 21 | 18 | 3  | 1 | 20 | 17 | 3  | 0 | 1288.53886 | -0.00008 | .00400 | -0.00008 | 0.20 |
| 935:  | 22 | 18 | 5  | 1 | 21 | 17 | 5  | 0 | 1288.96749 | -0.00035 | .00400 | -0.00035 | 0.20 |
| 936:  | 22 | 18 | 5  | 1 | 21 | 17 | 4  | 0 | 1288.96749 | -0.00035 | .00400 | -0.00035 | 0.30 |
| 937:  | 22 | 18 | 4  | 1 | 21 | 17 | 5  | 0 | 1288.96749 | -0.00035 | .00400 | -0.00035 | 0.30 |
| 938:  | 22 | 18 | 4  | 1 | 21 | 17 | 4  | 0 | 1288.96749 | -0.00035 | .00400 | -0.00035 | 0.20 |
| 939:  | 23 | 18 | 6  | 1 | 22 | 17 | 5  | 0 | 1289.39477 | -0.00224 | .00400 | -0.00224 | 0.30 |
| 940:  | 23 | 18 | 6  | 1 | 22 | 17 | 6  | 0 | 1289.39477 | -0.00224 | .00400 | -0.00224 | 0.20 |
| 941:  | 23 | 18 | 5  | 1 | 22 | 17 | 6  | 0 | 1289.39477 | -0.00224 | .00400 | -0.00224 | 0.30 |
| 942:  | 23 | 18 | 5  | 1 | 22 | 17 | 5  | 0 | 1289.39477 | -0.00224 | .00400 | -0.00224 | 0.20 |
| 943:  | 24 | 18 | 6  | 1 | 23 | 17 | 6  | 0 | 1289.82460 | -0.00182 | .00400 | -0.00182 | 0.20 |
| 944:  | 24 | 18 | 7  | 1 | 23 | 17 | 6  | 0 | 1289.82460 | -0.00182 | .00400 | -0.00182 | 0.30 |
| 945:  | 24 | 18 | 7  | 1 | 23 | 17 | 7  | 0 | 1289.82460 | -0.00182 | .00400 | -0.00182 | 0.20 |
| 946:  | 24 | 18 | 6  | 1 | 23 | 17 | 7  | 0 | 1289.82460 | -0.00182 | .00400 | -0.00182 | 0.30 |
| 947:  | 26 | 18 | 8  | 1 | 25 | 17 | 9  | 0 | 1290.68409 | -0.00189 | .00400 | -0.00189 | 0.30 |
| 948:  | 26 | 18 | 9  | 1 | 25 | 17 | 8  | 0 | 1290.68409 | -0.00189 | .00400 | -0.00189 | 0.30 |
| 949:  | 26 | 18 | 9  | 1 | 25 | 17 | 9  | 0 | 1290.68409 | -0.00189 | .00400 | -0.00189 | 0.20 |
| 950:  | 26 | 18 | 8  | 1 | 25 | 17 | 8  | 0 | 1290.68409 | -0.00189 | .00400 | -0.00189 | 0.20 |
| 951:  | 27 | 18 | 9  | 1 | 26 | 17 | 10 | 0 | 1291.11513 | -0.00096 | .00400 | -0.00096 | 0.30 |
| 952:  | 27 | 18 | 9  | 1 | 26 | 17 | 9  | 0 | 1291.11513 | -0.00096 | .00400 | -0.00096 | 0.20 |
| 953:  | 27 | 18 | 10 | 1 | 26 | 17 | 10 | 0 | 1291.11513 | -0.00096 | .00400 | -0.00096 | 0.20 |
| 954:  | 27 | 18 | 10 | 1 | 26 | 17 | 9  | 0 | 1291.11513 | -0.00096 | .00400 | -0.00096 | 0.30 |
| 955:  | 28 | 18 | 10 | 1 | 27 | 17 | 10 | 0 | 1291.54620 | -0.00022 | .00400 | -0.00022 | 0.20 |
| 956:  | 28 | 18 | 10 | 1 | 27 | 17 | 11 | 0 | 1291.54620 | -0.00022 | .00400 | -0.00022 | 0.30 |
| 957:  | 28 | 18 | 11 | 1 | 27 | 17 | 10 | 0 | 1291.54620 | -0.00022 | .00400 | -0.00022 | 0.30 |
| 958:  | 28 | 18 | 11 | 1 | 27 | 17 | 11 | 0 | 1291.54620 | -0.00022 | .00400 | -0.00022 | 0.20 |
| 959:  | 29 | 18 | 11 | 1 | 28 | 17 | 12 | 0 | 1291.97484 | -0.00210 | .00400 | -0.00210 | 0.30 |
| 960:  | 29 | 18 | 12 | 1 | 28 | 17 | 12 | 0 | 1291.97484 | -0.00210 | .00400 | -0.00210 | 0.20 |
| 961:  | 29 | 18 | 12 | 1 | 28 | 17 | 11 | 0 | 1291.97484 | -0.00210 | .00400 | -0.00210 | 0.30 |
| 962:  | 29 | 18 | 11 | 1 | 28 | 17 | 11 | 0 | 1291.97484 | -0.00210 | .00400 | -0.00210 | 0.20 |
| 963:  | 30 | 18 | 13 | 1 | 29 | 17 | 12 | 0 | 1292.40360 | -0.00404 | .00400 | -0.00404 | 0.30 |
| 964:  | 30 | 18 | 13 | 1 | 29 | 17 | 13 | 0 | 1292.40360 | -0.00404 | .00400 | -0.00404 | 0.20 |
| 965:  | 30 | 18 | 12 | 1 | 29 | 17 | 12 | 0 | 1292.40360 | -0.00404 | .00400 | -0.00404 | 0.20 |
| 966:  | 30 | 18 | 12 | 1 | 29 | 17 | 13 | 0 | 1292.40360 | -0.00404 | .00400 | -0.00404 | 0.30 |
| 967:  | 31 | 18 | 14 | 1 | 30 | 17 | 14 | 0 | 1292.83318 | -0.00533 | .00400 | -0.00533 | 0.20 |
| 968:  | 31 | 18 | 14 | 1 | 30 | 17 | 13 | 0 | 1292.83318 | -0.00533 | .00400 | -0.00533 | 0.30 |
| 969:  | 31 | 18 | 13 | 1 | 30 | 17 | 13 | 0 | 1292.83318 | -0.00533 | .00400 | -0.00533 | 0.20 |
| 970:  | 31 | 18 | 13 | 1 | 30 | 17 | 14 | 0 | 1292.83318 | -0.00533 | .00400 | -0.00533 | 0.30 |
| 971:  | 32 | 18 | 14 | 1 | 31 | 17 | 15 | 0 | 1293.26489 | -0.00464 | .00400 | -0.00464 | 0.30 |
| 972:  | 32 | 18 | 15 | 1 | 31 | 17 | 15 | 0 | 1293.26489 | -0.00464 | .00400 | -0.00464 | 0.20 |
| 973:  | 32 | 18 | 15 | 1 | 31 | 17 | 14 | 0 | 1293.26489 | -0.00464 | .00400 | -0.00464 | 0.30 |
| 974:  | 32 | 18 | 14 | 1 | 31 | 17 | 14 | 0 | 1293.26489 | -0.00464 | .00400 | -0.00464 | 0.20 |
| 975:  | 33 | 18 | 16 | 1 | 32 | 17 | 15 | 0 | 1293.69395 | -0.00675 | .00400 | -0.00675 | 0.30 |
| 976:  | 33 | 18 | 16 | 1 | 32 | 17 | 16 | 0 | 1293.69395 | -0.00675 | .00400 | -0.00675 | 0.20 |
| 977:  | 33 | 18 | 15 | 1 | 32 | 17 | 15 | 0 | 1293.69395 | -0.00675 | .00400 | -0.00675 | 0.20 |
| 978:  | 33 | 18 | 15 | 1 | 32 | 17 | 16 | 0 | 1293.69395 | -0.00675 | .00400 | -0.00675 | 0.30 |
| 979:  | 36 | 18 | 19 | 1 | 35 | 17 | 19 | 0 | 1294.99247 | -0.00239 | .00400 | -0.00239 | 0.20 |
| 980:  | 36 | 18 | 18 | 1 | 35 | 17 | 19 | 0 | 1294.99247 | -0.00239 | .00400 | -0.00239 | 0.30 |
| 981:  | 36 | 18 | 19 | 1 | 35 | 17 | 18 | 0 | 1294.99247 | -0.00239 | .00400 | -0.00239 | 0.30 |
| 982:  | 36 | 18 | 18 | 1 | 35 | 17 | 18 | 0 | 1294.99247 | -0.00239 | .00400 | -0.00239 | 0.20 |
| 983:  | 37 | 18 | 20 | 1 | 36 | 17 | 20 | 0 | 1295.42651 | 0.00009  | .00400 | 0.00009  | 0.20 |
| 984:  | 37 | 18 | 19 | 1 | 36 | 17 | 19 | 0 | 1295.42651 | 0.00009  | .00400 | 0.00009  | 0.20 |
| 985:  | 37 | 18 | 19 | 1 | 36 | 17 | 20 | 0 | 1295.42651 | 0.00009  | .00400 | 0.00009  | 0.30 |
| 986:  | 37 | 18 | 20 | 1 | 36 | 17 | 19 | 0 | 1295.42651 | 0.00009  | .00400 | 0.00009  | 0.30 |
| 987:  | 38 | 18 | 20 | 1 | 37 | 17 | 21 | 0 | 1295.86032 | 0.00229  | .00400 | 0.00229  | 0.30 |
| 988:  | 38 | 18 | 20 | 1 | 37 | 17 | 20 | 0 | 1295.86032 | 0.00229  | .00400 | 0.00229  | 0.20 |
| 989:  | 38 | 18 | 21 | 1 | 37 | 17 | 20 | 0 | 1295.86032 | 0.00229  | .00400 | 0.00229  | 0.30 |
| 990:  | 38 | 18 | 21 | 1 | 37 | 17 | 21 | 0 | 1295.86032 | 0.00229  | .00400 | 0.00229  | 0.20 |
| 991:  | 19 | 19 | 1  | 1 | 18 | 18 | 0  | 0 | 1288.42933 | -0.00068 | .00400 | -0.00068 | 0.30 |
| 992:  | 19 | 19 | 1  | 1 | 18 | 18 | 1  | 0 | 1288.42933 | -0.00068 | .00400 | -0.00068 | 0.20 |
| 993:  | 19 | 19 | 0  | 1 | 18 | 18 | 0  | 0 | 1288.42933 | -0.00068 | .00400 | -0.00068 | 0.20 |
| 994:  | 19 | 19 | 0  | 1 | 18 | 18 | 1  | 0 | 1288.42933 | -0.00068 | .00400 | -0.00068 | 0.30 |
| 995:  | 24 | 19 | 5  | 1 | 23 | 18 | 6  | 0 | 1290.57468 | 0.00010  | .00400 | 0.00010  | 0.30 |
| 996:  | 24 | 19 | 5  | 1 | 23 | 18 | 5  | 0 | 1290.57468 | 0.00010  | .00400 | 0.00010  | 0.20 |
| 997:  | 24 | 19 | 6  | 1 | 23 | 18 | 6  | 0 | 1290.57468 | 0.00010  | .00400 | 0.00010  | 0.20 |
| 998:  | 24 | 19 | 6  | 1 | 23 | 18 | 5  | 0 | 1290.57468 | 0.00010  | .00400 | 0.00010  | 0.30 |
| 999:  | 29 | 19 | 10 | 1 | 28 | 18 | 11 | 0 | 1292.72231 | -0.00320 | .00400 | -0.00320 | 0.30 |
| 1000: | 29 | 19 | 10 | 1 | 28 | 18 | 10 | 0 | 1292.72231 | -0.00320 | .00400 | -0.00320 | 0.20 |
| 1001: | 29 | 19 | 11 | 1 | 28 | 18 | 11 | 0 | 1292.72231 | -0.00320 | .00400 | -0.00320 | 0.20 |
| 1002: | 29 | 19 | 11 | 1 | 28 | 18 | 10 | 0 | 1292.72231 | -0.00320 | .00400 | -0.00320 | 0.30 |
| 1003: | 33 | 19 | 14 | 1 | 32 | 18 | 15 | 0 | 1294.44974 | -0.00018 | .00400 | -0.00018 | 0.30 |
| 1004: | 33 | 19 | 14 | 1 | 32 | 18 | 14 | 0 | 1294.44974 | -0.00018 | .00400 | -0.00018 | 0.20 |
| 1005: | 33 | 19 | 15 | 1 | 32 | 18 | 15 | 0 | 1294.44974 | -0.00018 | .00400 | -0.00018 | 0.20 |
| 1006: | 33 | 19 | 15 | 1 | 32 | 18 | 14 | 0 | 1294.44974 | -0.00018 | .00400 | -0.00018 | 0.30 |
| 1007: | 34 | 19 | 16 | 1 | 33 | 18 | 15 | 0 | 1294.87929 | -0.00214 | .00400 | -0.00214 | 0.37 |

|       |    |    |    |   |    |    |    |   |            |          |        |          |      |
|-------|----|----|----|---|----|----|----|---|------------|----------|--------|----------|------|
| 1008: | 34 | 19 | 15 | 1 | 33 | 18 | 16 | 0 | 1294.87929 | -0.00214 | .00400 | -0.00214 | 0.37 |
| 1009: | 34 | 19 | 16 | 1 | 33 | 18 | 16 | 0 | 1294.87929 | -0.00214 | .00400 | -0.00214 | 0.25 |
| 1010: | 37 | 19 | 18 | 1 | 36 | 18 | 18 | 0 | 1296.17146 | -0.00526 | .00400 | -0.00526 | 0.20 |
| 1011: | 37 | 19 | 19 | 1 | 36 | 18 | 18 | 0 | 1296.17146 | -0.00526 | .00400 | -0.00526 | 0.30 |
| 1012: | 37 | 19 | 19 | 1 | 36 | 18 | 19 | 0 | 1296.17146 | -0.00526 | .00400 | -0.00526 | 0.20 |
| 1013: | 37 | 19 | 18 | 1 | 36 | 18 | 19 | 0 | 1296.17146 | -0.00526 | .00400 | -0.00526 | 0.30 |
| 1014: | 38 | 19 | 20 | 1 | 37 | 18 | 20 | 0 | 1296.60744 | -0.00125 | .00400 | -0.00125 | 0.20 |
| 1015: | 38 | 19 | 20 | 1 | 37 | 18 | 19 | 0 | 1296.60744 | -0.00125 | .00400 | -0.00125 | 0.30 |
| 1016: | 38 | 19 | 19 | 1 | 37 | 18 | 19 | 0 | 1296.60744 | -0.00125 | .00400 | -0.00125 | 0.20 |
| 1017: | 38 | 19 | 19 | 1 | 37 | 18 | 20 | 0 | 1296.60744 | -0.00125 | .00400 | -0.00125 | 0.30 |
| 1018: | 39 | 19 | 21 | 1 | 38 | 18 | 21 | 0 | 1297.03994 | -0.00078 | .00400 | -0.00078 | 0.20 |
| 1019: | 39 | 19 | 21 | 1 | 38 | 18 | 20 | 0 | 1297.03994 | -0.00078 | .00400 | -0.00078 | 0.30 |
| 1020: | 39 | 19 | 20 | 1 | 38 | 18 | 21 | 0 | 1297.03994 | -0.00078 | .00400 | -0.00078 | 0.30 |
| 1021: | 39 | 19 | 20 | 1 | 38 | 18 | 20 | 0 | 1297.03994 | -0.00078 | .00400 | -0.00078 | 0.20 |
| 1022: | 40 | 19 | 21 | 1 | 39 | 18 | 22 | 0 | 1297.47716 | 0.00434  | .00400 | 0.00434  | 0.50 |
| 1023: | 40 | 19 | 22 | 1 | 39 | 18 | 21 | 0 | 1297.47716 | 0.00434  | .00400 | 0.00434  | 0.50 |
| 1024: | 41 | 19 | 23 | 1 | 40 | 18 | 22 | 0 | 1297.90478 | -0.00017 | .00400 | -0.00017 | 0.50 |
| 1025: | 41 | 19 | 22 | 1 | 40 | 18 | 23 | 0 | 1297.90478 | -0.00017 | .00400 | -0.00017 | 0.50 |
| 1026: | 43 | 19 | 25 | 1 | 42 | 18 | 24 | 0 | 1298.77061 | 0.00133  | .00400 | 0.00133  | 0.50 |
| 1027: | 43 | 19 | 24 | 1 | 42 | 18 | 25 | 0 | 1298.77061 | 0.00133  | .00400 | 0.00133  | 0.50 |
| 1028: | 44 | 19 | 26 | 1 | 43 | 18 | 25 | 0 | 1299.20611 | 0.00468  | .00400 | 0.00468  | 0.50 |
| 1029: | 44 | 19 | 25 | 1 | 43 | 18 | 26 | 0 | 1299.20611 | 0.00468  | .00400 | 0.00468  | 0.50 |
| 1030: | 20 | 20 | 0  | 1 | 19 | 19 | 1  | 0 | 1289.60146 | -0.00254 | .00400 | -0.00254 | 0.20 |
| 1031: | 20 | 20 | 1  | 1 | 19 | 19 | 1  | 0 | 1289.60146 | -0.00254 | .00400 | -0.00254 | 0.20 |
| 1032: | 20 | 20 | 1  | 1 | 19 | 19 | 0  | 0 | 1289.60146 | -0.00254 | .00400 | -0.00254 | 0.30 |
| 1033: | 20 | 20 | 0  | 1 | 19 | 19 | 0  | 0 | 1289.60146 | -0.00254 | .00400 | -0.00254 | 0.20 |
| 1034: | 21 | 20 | 1  | 1 | 20 | 19 | 2  | 0 | 1290.02949 | -0.00317 | .00400 | -0.00317 | 0.30 |
| 1035: | 21 | 20 | 2  | 1 | 20 | 19 | 1  | 0 | 1290.02949 | -0.00317 | .00400 | -0.00317 | 0.30 |
| 1036: | 21 | 20 | 1  | 1 | 20 | 19 | 1  | 0 | 1290.02949 | -0.00317 | .00400 | -0.00317 | 0.20 |
| 1037: | 21 | 20 | 2  | 1 | 20 | 19 | 2  | 0 | 1290.02949 | -0.00317 | .00400 | -0.00317 | 0.20 |
| 1038: | 22 | 20 | 2  | 1 | 21 | 19 | 2  | 0 | 1290.46251 | 0.00091  | .00400 | 0.00091  | 0.20 |
| 1039: | 22 | 20 | 3  | 1 | 21 | 19 | 2  | 0 | 1290.46251 | 0.00091  | .00400 | 0.00091  | 0.30 |
| 1040: | 22 | 20 | 3  | 1 | 21 | 19 | 3  | 0 | 1290.46251 | 0.00091  | .00400 | 0.00091  | 0.20 |
| 1041: | 22 | 20 | 2  | 1 | 21 | 19 | 3  | 0 | 1290.46251 | 0.00091  | .00400 | 0.00091  | 0.30 |
| 1042: | 24 | 20 | 4  | 1 | 23 | 19 | 5  | 0 | 1291.31935 | -0.00096 | .00400 | -0.00096 | 0.30 |
| 1043: | 24 | 20 | 4  | 1 | 23 | 19 | 4  | 0 | 1291.31935 | -0.00096 | .00400 | -0.00096 | 0.20 |
| 1044: | 24 | 20 | 5  | 1 | 23 | 19 | 5  | 0 | 1291.31935 | -0.00096 | .00400 | -0.00096 | 0.20 |
| 1045: | 24 | 20 | 5  | 1 | 23 | 19 | 4  | 0 | 1291.31935 | -0.00096 | .00400 | -0.00096 | 0.30 |
| 1046: | 25 | 20 | 5  | 1 | 24 | 19 | 6  | 0 | 1291.74983 | -0.00023 | .00400 | -0.00023 | 0.30 |
| 1047: | 25 | 20 | 5  | 1 | 24 | 19 | 5  | 0 | 1291.74983 | -0.00023 | .00400 | -0.00023 | 0.20 |
| 1048: | 25 | 20 | 6  | 1 | 24 | 19 | 6  | 0 | 1291.74983 | -0.00023 | .00400 | -0.00023 | 0.20 |
| 1049: | 25 | 20 | 6  | 1 | 24 | 19 | 5  | 0 | 1291.74983 | -0.00023 | .00400 | -0.00023 | 0.30 |
| 1050: | 26 | 20 | 6  | 1 | 25 | 19 | 7  | 0 | 1292.17870 | -0.00137 | .00400 | -0.00137 | 0.30 |
| 1051: | 26 | 20 | 6  | 1 | 25 | 19 | 6  | 0 | 1292.17870 | -0.00137 | .00400 | -0.00137 | 0.20 |
| 1052: | 26 | 20 | 7  | 1 | 25 | 19 | 6  | 0 | 1292.17870 | -0.00137 | .00400 | -0.00137 | 0.30 |
| 1053: | 26 | 20 | 7  | 1 | 25 | 19 | 7  | 0 | 1292.17870 | -0.00137 | .00400 | -0.00137 | 0.20 |
| 1054: | 27 | 20 | 8  | 1 | 26 | 19 | 7  | 0 | 1292.60792 | -0.00241 | .00400 | -0.00241 | 0.30 |
| 1055: | 27 | 20 | 8  | 1 | 26 | 19 | 8  | 0 | 1292.60792 | -0.00241 | .00400 | -0.00241 | 0.20 |
| 1056: | 27 | 20 | 7  | 1 | 26 | 19 | 8  | 0 | 1292.60792 | -0.00241 | .00400 | -0.00241 | 0.30 |
| 1057: | 27 | 20 | 7  | 1 | 26 | 19 | 7  | 0 | 1292.60792 | -0.00241 | .00400 | -0.00241 | 0.20 |
| 1058: | 28 | 20 | 8  | 1 | 27 | 19 | 8  | 0 | 1293.03744 | -0.00338 | .00400 | -0.00338 | 0.20 |
| 1059: | 28 | 20 | 8  | 1 | 27 | 19 | 9  | 0 | 1293.03744 | -0.00338 | .00400 | -0.00338 | 0.30 |
| 1060: | 28 | 20 | 9  | 1 | 27 | 19 | 8  | 0 | 1293.03744 | -0.00338 | .00400 | -0.00338 | 0.30 |
| 1061: | 28 | 20 | 9  | 1 | 27 | 19 | 9  | 0 | 1293.03744 | -0.00338 | .00400 | -0.00338 | 0.20 |
| 1062: | 29 | 20 | 9  | 1 | 28 | 19 | 10 | 0 | 1293.47145 | -0.00009 | .00400 | -0.00009 | 0.30 |
| 1063: | 29 | 20 | 9  | 1 | 28 | 19 | 9  | 0 | 1293.47145 | -0.00009 | .00400 | -0.00009 | 0.20 |
| 1064: | 29 | 20 | 10 | 1 | 28 | 19 | 9  | 0 | 1293.47145 | -0.00009 | .00400 | -0.00009 | 0.30 |
| 1065: | 29 | 20 | 10 | 1 | 28 | 19 | 10 | 0 | 1293.47145 | -0.00009 | .00400 | -0.00009 | 0.20 |
| 1066: | 30 | 20 | 11 | 1 | 29 | 19 | 11 | 0 | 1293.90130 | -0.00118 | .00400 | -0.00118 | 0.20 |
| 1067: | 30 | 20 | 11 | 1 | 29 | 19 | 10 | 0 | 1293.90130 | -0.00118 | .00400 | -0.00118 | 0.30 |
| 1068: | 30 | 20 | 10 | 1 | 29 | 19 | 10 | 0 | 1293.90130 | -0.00118 | .00400 | -0.00118 | 0.20 |
| 1069: | 30 | 20 | 10 | 1 | 29 | 19 | 11 | 0 | 1293.90130 | -0.00118 | .00400 | -0.00118 | 0.30 |
| 1070: | 31 | 20 | 11 | 1 | 30 | 19 | 11 | 0 | 1294.33579 | 0.00217  | .00400 | 0.00217  | 0.20 |
| 1071: | 31 | 20 | 11 | 1 | 30 | 19 | 12 | 0 | 1294.33579 | 0.00217  | .00400 | 0.00217  | 0.30 |
| 1072: | 31 | 20 | 12 | 1 | 30 | 19 | 12 | 0 | 1294.33579 | 0.00217  | .00400 | 0.00217  | 0.20 |
| 1073: | 31 | 20 | 12 | 1 | 30 | 19 | 11 | 0 | 1294.33579 | 0.00217  | .00400 | 0.00217  | 0.30 |
| 1074: | 32 | 20 | 12 | 1 | 31 | 19 | 13 | 0 | 1294.76526 | 0.00031  | .00400 | 0.00031  | 0.30 |
| 1075: | 32 | 20 | 12 | 1 | 31 | 19 | 12 | 0 | 1294.76526 | 0.00031  | .00400 | 0.00031  | 0.20 |
| 1076: | 32 | 20 | 13 | 1 | 31 | 19 | 13 | 0 | 1294.76526 | 0.00031  | .00400 | 0.00031  | 0.20 |
| 1077: | 32 | 20 | 13 | 1 | 31 | 19 | 12 | 0 | 1294.76526 | 0.00031  | .00400 | 0.00031  | 0.30 |
| 1078: | 33 | 20 | 13 | 1 | 32 | 19 | 13 | 0 | 1295.19860 | 0.00214  | .00400 | 0.00214  | 0.20 |
| 1079: | 33 | 20 | 14 | 1 | 32 | 19 | 13 | 0 | 1295.19860 | 0.00214  | .00400 | 0.00214  | 0.30 |
| 1080: | 33 | 20 | 14 | 1 | 32 | 19 | 14 | 0 | 1295.19860 | 0.00214  | .00400 | 0.00214  | 0.20 |
| 1081: | 33 | 20 | 13 | 1 | 32 | 19 | 14 | 0 | 1295.19860 | 0.00214  | .00400 | 0.00214  | 0.30 |
| 1082: | 34 | 20 | 14 | 1 | 33 | 19 | 15 | 0 | 1295.62535 | -0.00280 | .00400 | -0.00280 | 0.30 |
| 1083: | 34 | 20 | 15 | 1 | 33 | 19 | 15 | 0 | 1295.62535 | -0.00280 | .00400 | -0.00280 | 0.20 |
| 1084: | 34 | 20 | 15 | 1 | 33 | 19 | 14 | 0 | 1295.62535 | -0.00280 | .00400 | -0.00280 | 0.30 |
| 1085: | 34 | 20 | 14 | 1 | 33 | 19 | 14 | 0 | 1295.62535 | -0.00280 | .00400 | -0.00280 | 0.20 |

|       |    |    |    |   |    |    |    |   |            |          |        |          |      |
|-------|----|----|----|---|----|----|----|---|------------|----------|--------|----------|------|
| 1086: | 35 | 20 | 15 | 1 | 34 | 19 | 15 | 0 | 1296.06281 | 0.00282  | .00400 | 0.00282  | 0.20 |
| 1087: | 35 | 20 | 16 | 1 | 34 | 19 | 16 | 0 | 1296.06281 | 0.00282  | .00400 | 0.00282  | 0.20 |
| 1088: | 35 | 20 | 16 | 1 | 34 | 19 | 15 | 0 | 1296.06281 | 0.00282  | .00400 | 0.00282  | 0.30 |
| 1089: | 35 | 20 | 15 | 1 | 34 | 19 | 16 | 0 | 1296.06281 | 0.00282  | .00400 | 0.00282  | 0.30 |
| 1090: | 36 | 20 | 16 | 1 | 35 | 19 | 17 | 0 | 1296.49271 | 0.00073  | .00400 | 0.00073  | 0.30 |
| 1091: | 36 | 20 | 16 | 1 | 35 | 19 | 16 | 0 | 1296.49271 | 0.00073  | .00400 | 0.00073  | 0.20 |
| 1092: | 36 | 20 | 17 | 1 | 35 | 19 | 17 | 0 | 1296.49271 | 0.00073  | .00400 | 0.00073  | 0.20 |
| 1093: | 36 | 20 | 17 | 1 | 35 | 19 | 16 | 0 | 1296.49271 | 0.00073  | .00400 | 0.00073  | 0.30 |
| 1094: | 41 | 20 | 21 | 1 | 40 | 19 | 22 | 0 | 1298.65119 | -0.00242 | .00400 | -0.00242 | 0.50 |
| 1095: | 41 | 20 | 22 | 1 | 40 | 19 | 21 | 0 | 1298.65119 | -0.00242 | .00400 | -0.00242 | 0.50 |
| 1096: | 42 | 20 | 22 | 1 | 41 | 19 | 23 | 0 | 1299.08863 | 0.00246  | .00400 | 0.00246  | 0.50 |
| 1097: | 42 | 20 | 23 | 1 | 41 | 19 | 22 | 0 | 1299.08863 | 0.00246  | .00400 | 0.00246  | 0.50 |
| 1098: | 43 | 20 | 24 | 1 | 42 | 19 | 23 | 0 | 1299.52188 | 0.00311  | .00400 | 0.00311  | 0.50 |
| 1099: | 43 | 20 | 23 | 1 | 42 | 19 | 24 | 0 | 1299.52188 | 0.00311  | .00400 | 0.00311  | 0.50 |
| 1100: | 44 | 20 | 25 | 1 | 43 | 19 | 24 | 0 | 1299.95051 | -0.00090 | .00400 | -0.00090 | 0.50 |
| 1101: | 44 | 20 | 24 | 1 | 43 | 19 | 25 | 0 | 1299.95051 | -0.00090 | .00400 | -0.00090 | 0.50 |
| 1102: | 21 | 21 | 0  | 1 | 20 | 20 | 0  | 0 | 1290.77284 | -0.00300 | .00400 | -0.00300 | 0.20 |
| 1103: | 21 | 21 | 1  | 1 | 20 | 20 | 1  | 0 | 1290.77284 | -0.00300 | .00400 | -0.00300 | 0.20 |
| 1104: | 21 | 21 | 1  | 1 | 20 | 20 | 0  | 0 | 1290.77284 | -0.00300 | .00400 | -0.00300 | 0.30 |
| 1105: | 21 | 21 | 0  | 1 | 20 | 20 | 1  | 0 | 1290.77284 | -0.00300 | .00400 | -0.00300 | 0.30 |
| 1106: | 22 | 21 | 2  | 1 | 21 | 20 | 2  | 0 | 1291.20541 | 0.00062  | .00400 | 0.00062  | 0.20 |
| 1107: | 22 | 21 | 2  | 1 | 21 | 20 | 1  | 0 | 1291.20541 | 0.00062  | .00400 | 0.00062  | 0.30 |
| 1108: | 22 | 21 | 1  | 1 | 21 | 20 | 2  | 0 | 1291.20541 | 0.00062  | .00400 | 0.00062  | 0.30 |
| 1109: | 22 | 21 | 1  | 1 | 21 | 20 | 1  | 0 | 1291.20541 | 0.00062  | .00400 | 0.00062  | 0.20 |
| 1110: | 23 | 21 | 2  | 1 | 22 | 20 | 3  | 0 | 1291.62875 | -0.00527 | .00400 | -0.00527 | 0.30 |
| 1111: | 23 | 21 | 3  | 1 | 22 | 20 | 3  | 0 | 1291.62875 | -0.00527 | .00400 | -0.00527 | 0.20 |
| 1112: | 23 | 21 | 3  | 1 | 22 | 20 | 2  | 0 | 1291.62875 | -0.00527 | .00400 | -0.00527 | 0.30 |
| 1113: | 23 | 21 | 2  | 1 | 22 | 20 | 2  | 0 | 1291.62875 | -0.00527 | .00400 | -0.00527 | 0.20 |
| 1114: | 24 | 21 | 3  | 1 | 23 | 20 | 4  | 0 | 1292.06366 | 0.00012  | .00400 | 0.00012  | 0.30 |
| 1115: | 24 | 21 | 3  | 1 | 23 | 20 | 3  | 0 | 1292.06366 | 0.00012  | .00400 | 0.00012  | 0.20 |
| 1116: | 24 | 21 | 4  | 1 | 23 | 20 | 3  | 0 | 1292.06366 | 0.00012  | .00400 | 0.00012  | 0.30 |
| 1117: | 24 | 21 | 4  | 1 | 23 | 20 | 4  | 0 | 1292.06366 | 0.00012  | .00400 | 0.00012  | 0.20 |
| 1118: | 25 | 21 | 4  | 1 | 24 | 20 | 4  | 0 | 1292.49354 | 0.00022  | .00400 | 0.00022  | 0.20 |
| 1119: | 25 | 21 | 4  | 1 | 24 | 20 | 5  | 0 | 1292.49354 | 0.00022  | .00400 | 0.00022  | 0.30 |
| 1120: | 25 | 21 | 5  | 1 | 24 | 20 | 5  | 0 | 1292.49354 | 0.00022  | .00400 | 0.00022  | 0.20 |
| 1121: | 25 | 21 | 5  | 1 | 24 | 20 | 4  | 0 | 1292.49354 | 0.00022  | .00400 | 0.00022  | 0.30 |
| 1122: | 26 | 21 | 6  | 1 | 25 | 20 | 6  | 0 | 1292.92467 | 0.00130  | .00400 | 0.00130  | 0.20 |
| 1123: | 26 | 21 | 5  | 1 | 25 | 20 | 5  | 0 | 1292.92467 | 0.00130  | .00400 | 0.00130  | 0.20 |
| 1124: | 26 | 21 | 5  | 1 | 25 | 20 | 6  | 0 | 1292.92467 | 0.00130  | .00400 | 0.00130  | 0.30 |
| 1125: | 26 | 21 | 6  | 1 | 25 | 20 | 5  | 0 | 1292.92467 | 0.00130  | .00400 | 0.00130  | 0.30 |
| 1126: | 27 | 21 | 7  | 1 | 26 | 20 | 6  | 0 | 1293.35623 | 0.00256  | .00400 | 0.00256  | 0.30 |
| 1127: | 27 | 21 | 6  | 1 | 26 | 20 | 7  | 0 | 1293.35623 | 0.00256  | .00400 | 0.00256  | 0.30 |
| 1128: | 27 | 21 | 7  | 1 | 26 | 20 | 7  | 0 | 1293.35623 | 0.00256  | .00400 | 0.00256  | 0.20 |
| 1129: | 27 | 21 | 6  | 1 | 26 | 20 | 6  | 0 | 1293.35623 | 0.00256  | .00400 | 0.00256  | 0.20 |
| 1130: | 28 | 21 | 7  | 1 | 27 | 20 | 7  | 0 | 1293.78358 | -0.00064 | .00400 | -0.00064 | 0.20 |
| 1131: | 28 | 21 | 7  | 1 | 27 | 20 | 8  | 0 | 1293.78358 | -0.00064 | .00400 | -0.00064 | 0.30 |
| 1132: | 28 | 21 | 8  | 1 | 27 | 20 | 7  | 0 | 1293.78358 | -0.00064 | .00400 | -0.00064 | 0.30 |
| 1133: | 28 | 21 | 8  | 1 | 27 | 20 | 8  | 0 | 1293.78358 | -0.00064 | .00400 | -0.00064 | 0.20 |
| 1134: | 29 | 21 | 8  | 1 | 28 | 20 | 9  | 0 | 1294.21491 | -0.00010 | .00400 | -0.00010 | 0.30 |
| 1135: | 29 | 21 | 9  | 1 | 28 | 20 | 8  | 0 | 1294.21491 | -0.00010 | .00400 | -0.00010 | 0.30 |
| 1136: | 29 | 21 | 9  | 1 | 28 | 20 | 9  | 0 | 1294.21491 | -0.00010 | .00400 | -0.00010 | 0.20 |
| 1137: | 29 | 21 | 8  | 1 | 28 | 20 | 8  | 0 | 1294.21491 | -0.00010 | .00400 | -0.00010 | 0.20 |
| 1138: | 30 | 21 | 10 | 1 | 29 | 20 | 9  | 0 | 1294.64736 | 0.00134  | .00400 | 0.00134  | 0.30 |
| 1139: | 30 | 21 | 9  | 1 | 29 | 20 | 10 | 0 | 1294.64736 | 0.00134  | .00400 | 0.00134  | 0.30 |
| 1140: | 30 | 21 | 10 | 1 | 29 | 20 | 10 | 0 | 1294.64736 | 0.00134  | .00400 | 0.00134  | 0.20 |
| 1141: | 30 | 21 | 9  | 1 | 29 | 20 | 9  | 0 | 1294.64736 | 0.00134  | .00400 | 0.00134  | 0.20 |
| 1142: | 31 | 21 | 11 | 1 | 30 | 20 | 10 | 0 | 1295.08373 | 0.00648  | .00400 | 0.00648  | 0.30 |
| 1143: | 31 | 21 | 11 | 1 | 30 | 20 | 11 | 0 | 1295.08373 | 0.00648  | .00400 | 0.00648  | 0.20 |
| 1144: | 31 | 21 | 10 | 1 | 30 | 20 | 10 | 0 | 1295.08373 | 0.00648  | .00400 | 0.00648  | 0.20 |
| 1145: | 31 | 21 | 10 | 1 | 30 | 20 | 11 | 0 | 1295.08373 | 0.00648  | .00400 | 0.00648  | 0.30 |
| 1146: | 32 | 21 | 11 | 1 | 31 | 20 | 11 | 0 | 1295.51457 | 0.00588  | .00400 | 0.00588  | 0.20 |
| 1147: | 32 | 21 | 12 | 1 | 31 | 20 | 12 | 0 | 1295.51457 | 0.00588  | .00400 | 0.00588  | 0.20 |
| 1148: | 32 | 21 | 12 | 1 | 31 | 20 | 11 | 0 | 1295.51457 | 0.00588  | .00400 | 0.00588  | 0.30 |
| 1149: | 32 | 21 | 11 | 1 | 31 | 20 | 12 | 0 | 1295.51457 | 0.00588  | .00400 | 0.00588  | 0.30 |
| 1150: | 33 | 21 | 12 | 1 | 32 | 20 | 12 | 0 | 1295.94194 | 0.00162  | .00400 | 0.00162  | 0.20 |
| 1151: | 33 | 21 | 12 | 1 | 32 | 20 | 13 | 0 | 1295.94194 | 0.00162  | .00400 | 0.00162  | 0.30 |
| 1152: | 33 | 21 | 13 | 1 | 32 | 20 | 12 | 0 | 1295.94194 | 0.00162  | .00400 | 0.00162  | 0.30 |
| 1153: | 33 | 21 | 13 | 1 | 32 | 20 | 13 | 0 | 1295.94194 | 0.00162  | .00400 | 0.00162  | 0.20 |
| 1154: | 34 | 21 | 13 | 1 | 33 | 20 | 13 | 0 | 1296.37412 | 0.00198  | .00400 | 0.00198  | 0.20 |
| 1155: | 34 | 21 | 14 | 1 | 33 | 20 | 13 | 0 | 1296.37412 | 0.00198  | .00400 | 0.00198  | 0.30 |
| 1156: | 34 | 21 | 14 | 1 | 33 | 20 | 14 | 0 | 1296.37412 | 0.00198  | .00400 | 0.00198  | 0.20 |
| 1157: | 34 | 21 | 13 | 1 | 33 | 20 | 14 | 0 | 1296.37412 | 0.00198  | .00400 | 0.00198  | 0.30 |
| 1158: | 35 | 21 | 15 | 1 | 34 | 20 | 15 | 0 | 1296.80764 | 0.00350  | .00400 | 0.00351  | 0.20 |
| 1159: | 35 | 21 | 15 | 1 | 34 | 20 | 14 | 0 | 1296.80764 | 0.00350  | .00400 | 0.00351  | 0.30 |
| 1160: | 35 | 21 | 14 | 1 | 34 | 20 | 15 | 0 | 1296.80764 | 0.00350  | .00400 | 0.00351  | 0.30 |
| 1161: | 35 | 21 | 14 | 1 | 34 | 20 | 14 | 0 | 1296.80764 | 0.00350  | .00400 | 0.00351  | 0.20 |
| 1162: | 36 | 21 | 15 | 1 | 35 | 20 | 15 | 0 | 1297.23879 | 0.00250  | .00400 | 0.00250  | 0.20 |
| 1163: | 36 | 21 | 15 | 1 | 35 | 20 | 16 | 0 | 1297.23879 | 0.00250  | .00400 | 0.00250  | 0.30 |

|       |    |    |    |   |    |    |    |   |            |          |        |          |      |
|-------|----|----|----|---|----|----|----|---|------------|----------|--------|----------|------|
| 1164: | 36 | 21 | 16 | 1 | 35 | 20 | 16 | 0 | 1297.23879 | 0.00250  | .00400 | 0.00250  | 0.20 |
| 1165: | 36 | 21 | 16 | 1 | 35 | 20 | 15 | 0 | 1297.23879 | 0.00250  | .00400 | 0.00250  | 0.30 |
| 1166: | 37 | 21 | 17 | 1 | 36 | 20 | 16 | 0 | 1297.67073 | 0.00213  | .00400 | 0.00213  | 0.30 |
| 1167: | 37 | 21 | 17 | 1 | 36 | 20 | 17 | 0 | 1297.67073 | 0.00213  | .00400 | 0.00213  | 0.20 |
| 1168: | 37 | 21 | 16 | 1 | 36 | 20 | 16 | 0 | 1297.67073 | 0.00213  | .00400 | 0.00213  | 0.20 |
| 1169: | 37 | 21 | 16 | 1 | 36 | 20 | 17 | 0 | 1297.67073 | 0.00213  | .00400 | 0.00213  | 0.30 |
| 1170: | 38 | 21 | 18 | 1 | 37 | 20 | 17 | 0 | 1298.10658 | 0.00552  | .00400 | 0.00552  | 0.30 |
| 1171: | 38 | 21 | 17 | 1 | 37 | 20 | 17 | 0 | 1298.10658 | 0.00552  | .00400 | 0.00552  | 0.20 |
| 1172: | 38 | 21 | 17 | 1 | 37 | 20 | 18 | 0 | 1298.10658 | 0.00552  | .00400 | 0.00552  | 0.30 |
| 1173: | 38 | 21 | 18 | 1 | 37 | 20 | 18 | 0 | 1298.10658 | 0.00552  | .00400 | 0.00552  | 0.20 |
| 1174: | 39 | 21 | 19 | 1 | 38 | 20 | 18 | 0 | 1298.53576 | 0.00213  | .00400 | 0.00213  | 0.50 |
| 1175: | 39 | 21 | 18 | 1 | 38 | 20 | 19 | 0 | 1298.53576 | 0.00213  | .00400 | 0.00213  | 0.50 |
| 1176: | 40 | 21 | 19 | 1 | 39 | 20 | 20 | 0 | 1298.96881 | 0.00248  | .00400 | 0.00248  | 0.50 |
| 1177: | 40 | 21 | 20 | 1 | 39 | 20 | 19 | 0 | 1298.96881 | 0.00248  | .00400 | 0.00248  | 0.50 |
| 1178: | 41 | 21 | 21 | 1 | 40 | 20 | 20 | 0 | 1299.40134 | 0.00222  | .00400 | 0.00222  | 0.50 |
| 1179: | 41 | 21 | 20 | 1 | 40 | 20 | 21 | 0 | 1299.40134 | 0.00222  | .00400 | 0.00222  | 0.50 |
| 1180: | 42 | 21 | 21 | 1 | 41 | 20 | 22 | 0 | 1299.83196 | -0.00004 | .00400 | -0.00004 | 0.50 |
| 1181: | 42 | 21 | 22 | 1 | 41 | 20 | 21 | 0 | 1299.83196 | -0.00004 | .00400 | -0.00004 | 0.50 |
| 1182: | 17 | 5  | 13 | 1 | 17 | 4  | 14 | 0 | 1269.69846 | 0.00531  | .01000 | -0.00168 | 0.05 |
| 1183: | 14 | 5  | 9  | 1 | 14 | 4  | 11 | 0 | 1269.69846 | 0.00250  | .01000 | -0.00168 | 0.03 |
| 1184: | 15 | 5  | 10 | 1 | 15 | 4  | 12 | 0 | 1269.69846 | 0.00304  | .01000 | -0.00168 | 0.03 |
| 1185: | 14 | 5  | 10 | 1 | 14 | 4  | 11 | 0 | 1269.69846 | 0.00405  | .01000 | -0.00168 | 0.04 |
| 1186: | 11 | 5  | 7  | 1 | 11 | 4  | 7  | 0 | 1269.69846 | 0.00205  | .01000 | -0.00168 | 0.02 |
| 1187: | 16 | 5  | 11 | 1 | 16 | 4  | 13 | 0 | 1269.69846 | 0.00109  | .01000 | -0.00168 | 0.03 |
| 1188: | 13 | 5  | 9  | 1 | 13 | 4  | 10 | 0 | 1269.69846 | 0.00149  | .01000 | -0.00168 | 0.04 |
| 1189: | 10 | 5  | 6  | 1 | 10 | 4  | 6  | 0 | 1269.69846 | -0.00202 | .01000 | -0.00168 | 0.02 |
| 1190: | 13 | 5  | 8  | 1 | 13 | 4  | 10 | 0 | 1269.69846 | 0.00075  | .01000 | -0.00168 | 0.03 |
| 1191: | 20 | 6  | 15 | 1 | 19 | 7  | 12 | 0 | 1269.69846 | -0.00251 | .01000 | -0.00168 | 0.02 |
| 1192: | 12 | 5  | 8  | 1 | 12 | 4  | 9  | 0 | 1269.69846 | -0.00099 | .01000 | -0.00168 | 0.04 |
| 1193: | 18 | 5  | 14 | 1 | 18 | 4  | 15 | 0 | 1269.69846 | 0.00020  | .01000 | -0.00168 | 0.05 |
| 1194: | 12 | 5  | 7  | 1 | 12 | 4  | 9  | 0 | 1269.69846 | -0.00132 | .01000 | -0.00168 | 0.02 |
| 1195: | 11 | 5  | 7  | 1 | 11 | 4  | 8  | 0 | 1269.69846 | -0.00302 | .01000 | -0.00168 | 0.04 |
| 1196: | 10 | 5  | 5  | 1 | 10 | 4  | 6  | 0 | 1269.69846 | -0.00207 | .01000 | -0.00168 | 0.04 |
| 1197: | 9  | 5  | 4  | 1 | 9  | 4  | 5  | 0 | 1269.69846 | -0.00408 | .01000 | -0.00168 | 0.04 |
| 1198: | 6  | 5  | 1  | 1 | 6  | 4  | 2  | 0 | 1269.69846 | -0.00370 | .01000 | -0.00168 | 0.03 |
| 1199: | 9  | 5  | 4  | 1 | 9  | 4  | 6  | 0 | 1269.69846 | -0.00511 | .01000 | -0.00168 | 0.02 |
| 1200: | 9  | 5  | 5  | 1 | 9  | 4  | 5  | 0 | 1269.69846 | -0.00407 | .01000 | -0.00168 | 0.02 |
| 1201: | 6  | 5  | 2  | 1 | 6  | 4  | 3  | 0 | 1269.69846 | -0.00374 | .01000 | -0.00168 | 0.03 |
| 1202: | 10 | 5  | 6  | 1 | 10 | 4  | 7  | 0 | 1269.69846 | -0.00441 | .01000 | -0.00168 | 0.04 |
| 1203: | 20 | 6  | 14 | 1 | 19 | 7  | 13 | 0 | 1269.69846 | -0.00577 | .01000 | -0.00168 | 0.02 |
| 1204: | 10 | 5  | 5  | 1 | 10 | 4  | 7  | 0 | 1269.69846 | -0.00446 | .01000 | -0.00168 | 0.02 |
| 1205: | 7  | 5  | 2  | 1 | 7  | 4  | 3  | 0 | 1269.69846 | -0.00450 | .01000 | -0.00168 | 0.03 |
| 1206: | 11 | 5  | 6  | 1 | 11 | 4  | 7  | 0 | 1269.69846 | 0.00191  | .01000 | -0.00168 | 0.04 |
| 1207: | 17 | 5  | 12 | 1 | 17 | 4  | 14 | 0 | 1269.69846 | -0.00512 | .01000 | -0.00168 | 0.03 |
| 1208: | 8  | 5  | 3  | 1 | 8  | 4  | 4  | 0 | 1269.69846 | -0.00474 | .01000 | -0.00168 | 0.03 |
| 1209: | 11 | 5  | 6  | 1 | 11 | 4  | 8  | 0 | 1269.69846 | -0.00316 | .01000 | -0.00168 | 0.02 |
| 1210: | 7  | 5  | 3  | 1 | 7  | 4  | 4  | 0 | 1269.69846 | -0.00463 | .01000 | -0.00168 | 0.03 |
| 1211: | 8  | 5  | 3  | 1 | 8  | 4  | 5  | 0 | 1269.69846 | -0.00514 | .01000 | -0.00168 | 0.02 |
| 1212: | 9  | 5  | 5  | 1 | 9  | 4  | 6  | 0 | 1269.69846 | -0.00509 | .01000 | -0.00168 | 0.04 |
| 1213: | 8  | 5  | 4  | 1 | 8  | 4  | 4  | 0 | 1269.69846 | -0.00473 | .01000 | -0.00168 | 0.02 |
| 1214: | 8  | 5  | 4  | 1 | 8  | 4  | 5  | 0 | 1269.69846 | -0.00513 | .01000 | -0.00168 | 0.03 |
| 1215: | 26 | 2  | 25 | 1 | 26 | 1  | 26 | 0 | 1271.14188 | 0.00117  | .01000 | 0.00125  | 0.15 |
| 1216: | 7  | 3  | 5  | 1 | 6  | 2  | 5  | 0 | 1271.14188 | 0.00680  | .01000 | 0.00125  | 0.12 |
| 1217: | 7  | 3  | 4  | 1 | 6  | 2  | 5  | 0 | 1271.14188 | 0.00001  | .01000 | 0.00125  | 0.17 |
| 1218: | 19 | 4  | 15 | 1 | 18 | 5  | 14 | 0 | 1271.14188 | -0.00786 | .01000 | 0.00125  | 0.14 |
| 1219: | 26 | 1  | 25 | 1 | 26 | 0  | 26 | 0 | 1271.14188 | 0.00534  | .01000 | 0.00125  | 0.15 |
| 1220: | 12 | 1  | 12 | 1 | 11 | 0  | 11 | 0 | 1271.14188 | 0.00209  | .01000 | 0.00125  | 0.28 |
| 1221: | 16 | 2  | 14 | 1 | 15 | 3  | 13 | 0 | 1272.09541 | 0.00008  | .01000 | 0.00369  | 0.46 |
| 1222: | 14 | 9  | 6  | 1 | 13 | 9  | 5  | 0 | 1272.09541 | 0.00669  | .01000 | 0.00369  | 0.27 |
| 1223: | 14 | 9  | 5  | 1 | 13 | 9  | 4  | 0 | 1272.09541 | 0.00669  | .01000 | 0.00369  | 0.27 |
| 1224: | 6  | 5  | 1  | 1 | 5  | 4  | 1  | 0 | 1272.22895 | -0.00546 | .01000 | -0.00609 | 0.13 |
| 1225: | 6  | 5  | 2  | 1 | 5  | 4  | 1  | 0 | 1272.22895 | -0.00546 | .01000 | -0.00609 | 0.20 |
| 1226: | 14 | 3  | 11 | 1 | 13 | 3  | 10 | 0 | 1272.22895 | -0.01398 | .01000 | -0.00609 | 0.14 |
| 1227: | 6  | 5  | 1  | 1 | 5  | 4  | 2  | 0 | 1272.22895 | -0.00547 | .01000 | -0.00609 | 0.20 |
| 1228: | 6  | 5  | 2  | 1 | 5  | 4  | 2  | 0 | 1272.22895 | -0.00547 | .01000 | -0.00609 | 0.13 |
| 1229: | 39 | 5  | 35 | 1 | 39 | 4  | 36 | 0 | 1272.22895 | -0.00217 | .01000 | -0.00609 | 0.18 |
| 1230: | 14 | 2  | 12 | 1 | 13 | 2  | 11 | 0 | 1272.27489 | 0.00021  | .01000 | 0.00187  | 0.20 |
| 1231: | 15 | 1  | 14 | 1 | 14 | 2  | 13 | 0 | 1272.27489 | -0.00114 | .01000 | 0.00187  | 0.33 |
| 1232: | 46 | 8  | 39 | 1 | 46 | 7  | 40 | 0 | 1272.27489 | 0.00722  | .01000 | 0.00187  | 0.23 |
| 1233: | 42 | 9  | 33 | 1 | 42 | 8  | 34 | 0 | 1272.27489 | 0.00224  | .01000 | 0.00187  | 0.25 |
| 1234: | 15 | 0  | 15 | 1 | 14 | 1  | 14 | 0 | 1272.29663 | -0.00311 | .01000 | -0.00422 | 0.40 |
| 1235: | 8  | 4  | 5  | 1 | 7  | 3  | 4  | 0 | 1272.29663 | -0.00533 | .01000 | -0.00422 | 0.25 |
| 1236: | 8  | 4  | 4  | 1 | 7  | 3  | 4  | 0 | 1272.29663 | -0.00572 | .01000 | -0.00422 | 0.17 |
| 1237: | 24 | 5  | 20 | 1 | 23 | 6  | 17 | 0 | 1272.29663 | -0.00369 | .01000 | -0.00422 | 0.18 |
| 1238: | 19 | 2  | 17 | 1 | 18 | 3  | 15 | 0 | 1272.72405 | 0.00440  | .01000 | 0.00133  | 0.07 |
| 1239: | 9  | 4  | 6  | 1 | 8  | 3  | 5  | 0 | 1272.72405 | 0.00488  | .01000 | 0.00133  | 0.12 |
| 1240: | 47 | 7  | 41 | 1 | 47 | 6  | 42 | 0 | 1272.72405 | 0.00435  | .01000 | 0.00133  | 0.10 |
| 1241: | 16 | 1  | 16 | 1 | 15 | 0  | 15 | 0 | 1272.72405 | -0.00138 | .01000 | 0.00133  | 0.19 |



|       |    |    |    |   |    |   |    |   |            |          |        |         |      |
|-------|----|----|----|---|----|---|----|---|------------|----------|--------|---------|------|
| 1242: | 34 | 9  | 26 | 1 | 34 | 8 | 26 | 0 | 1272.72405 | -0.00073 | .01000 | 0.00133 | 0.08 |
| 1243: | 35 | 9  | 27 | 1 | 35 | 8 | 28 | 0 | 1272.72405 | -0.00187 | .01000 | 0.00133 | 0.13 |
| 1244: | 16 | 0  | 16 | 1 | 15 | 0 | 15 | 0 | 1272.72405 | 0.00549  | .01000 | 0.00133 | 0.09 |
| 1245: | 9  | 4  | 5  | 1 | 8  | 3 | 5  | 0 | 1272.72405 | 0.00388  | .01000 | 0.00133 | 0.08 |
| 1246: | 34 | 9  | 25 | 1 | 34 | 8 | 26 | 0 | 1272.72405 | -0.00200 | .01000 | 0.00133 | 0.13 |
| 1247: | 22 | 9  | 13 | 1 | 22 | 8 | 15 | 0 | 1272.82529 | 0.00034  | .01000 | 0.00405 | 0.02 |
| 1248: | 22 | 9  | 14 | 1 | 22 | 8 | 15 | 0 | 1272.82529 | 0.00034  | .01000 | 0.00405 | 0.03 |
| 1249: | 22 | 9  | 13 | 1 | 22 | 8 | 14 | 0 | 1272.82529 | 0.00036  | .01000 | 0.00405 | 0.03 |
| 1250: | 22 | 9  | 14 | 1 | 22 | 8 | 14 | 0 | 1272.82529 | 0.00036  | .01000 | 0.00405 | 0.02 |
| 1251: | 21 | 9  | 12 | 1 | 21 | 8 | 14 | 0 | 1272.82529 | 0.00089  | .01000 | 0.00405 | 0.02 |
| 1252: | 23 | 9  | 14 | 1 | 23 | 8 | 16 | 0 | 1272.82529 | 0.00052  | .01000 | 0.00405 | 0.02 |
| 1253: | 21 | 9  | 12 | 1 | 21 | 8 | 13 | 0 | 1272.82529 | 0.00090  | .01000 | 0.00405 | 0.03 |
| 1254: | 23 | 9  | 14 | 1 | 23 | 8 | 15 | 0 | 1272.82529 | 0.00056  | .01000 | 0.00405 | 0.03 |
| 1255: | 21 | 9  | 13 | 1 | 21 | 8 | 14 | 0 | 1272.82529 | 0.00089  | .01000 | 0.00405 | 0.03 |
| 1256: | 23 | 9  | 15 | 1 | 23 | 8 | 16 | 0 | 1272.82529 | 0.00052  | .01000 | 0.00405 | 0.03 |
| 1257: | 24 | 9  | 15 | 1 | 24 | 8 | 16 | 0 | 1272.82529 | 0.00160  | .01000 | 0.00405 | 0.03 |
| 1258: | 23 | 9  | 15 | 1 | 23 | 8 | 15 | 0 | 1272.82529 | 0.00056  | .01000 | 0.00405 | 0.02 |
| 1259: | 20 | 9  | 11 | 1 | 20 | 8 | 13 | 0 | 1272.82529 | 0.00205  | .01000 | 0.00405 | 0.02 |
| 1260: | 20 | 9  | 12 | 1 | 20 | 8 | 13 | 0 | 1272.82529 | 0.00205  | .01000 | 0.00405 | 0.03 |
| 1261: | 20 | 9  | 11 | 1 | 20 | 8 | 12 | 0 | 1272.82529 | 0.00206  | .01000 | 0.00405 | 0.03 |
| 1262: | 20 | 9  | 12 | 1 | 20 | 8 | 12 | 0 | 1272.82529 | 0.00206  | .01000 | 0.00405 | 0.02 |
| 1263: | 24 | 9  | 16 | 1 | 24 | 8 | 16 | 0 | 1272.82529 | 0.00160  | .01000 | 0.00405 | 0.02 |
| 1264: | 24 | 9  | 16 | 1 | 24 | 8 | 17 | 0 | 1272.82529 | 0.00152  | .01000 | 0.00405 | 0.03 |
| 1265: | 19 | 9  | 11 | 1 | 19 | 8 | 12 | 0 | 1272.82529 | 0.00374  | .01000 | 0.00405 | 0.03 |
| 1266: | 24 | 9  | 15 | 1 | 24 | 8 | 17 | 0 | 1272.82529 | 0.00152  | .01000 | 0.00405 | 0.02 |
| 1267: | 19 | 9  | 10 | 1 | 19 | 8 | 12 | 0 | 1272.82529 | 0.00374  | .01000 | 0.00405 | 0.02 |
| 1268: | 25 | 9  | 17 | 1 | 25 | 8 | 18 | 0 | 1272.82529 | 0.00346  | .01000 | 0.00405 | 0.03 |
| 1269: | 19 | 9  | 11 | 1 | 19 | 8 | 11 | 0 | 1272.82529 | 0.00374  | .01000 | 0.00405 | 0.02 |
| 1270: | 25 | 9  | 16 | 1 | 25 | 8 | 18 | 0 | 1272.82529 | 0.00346  | .01000 | 0.00405 | 0.02 |
| 1271: | 16 | 9  | 8  | 1 | 16 | 8 | 9  | 0 | 1272.82529 | 0.01108  | .01000 | 0.00405 | 0.03 |
| 1272: | 25 | 9  | 16 | 1 | 25 | 8 | 17 | 0 | 1272.82529 | 0.00361  | .01000 | 0.00405 | 0.03 |
| 1273: | 25 | 9  | 17 | 1 | 25 | 8 | 17 | 0 | 1272.82529 | 0.00361  | .01000 | 0.00405 | 0.02 |
| 1274: | 18 | 9  | 9  | 1 | 18 | 8 | 10 | 0 | 1272.82529 | 0.00586  | .01000 | 0.00405 | 0.03 |
| 1275: | 18 | 9  | 10 | 1 | 18 | 8 | 11 | 0 | 1272.82529 | 0.00586  | .01000 | 0.00405 | 0.03 |
| 1276: | 18 | 9  | 10 | 1 | 18 | 8 | 10 | 0 | 1272.82529 | 0.00586  | .01000 | 0.00405 | 0.02 |
| 1277: | 18 | 9  | 9  | 1 | 18 | 8 | 11 | 0 | 1272.82529 | 0.00586  | .01000 | 0.00405 | 0.02 |
| 1278: | 50 | 8  | 43 | 1 | 50 | 7 | 44 | 0 | 1272.82529 | 0.00904  | .01000 | 0.00405 | 0.02 |
| 1279: | 17 | 9  | 8  | 1 | 17 | 8 | 10 | 0 | 1272.82529 | 0.00833  | .01000 | 0.00405 | 0.02 |
| 1280: | 26 | 9  | 18 | 1 | 26 | 8 | 19 | 0 | 1272.82529 | 0.00646  | .01000 | 0.00405 | 0.03 |
| 1281: | 17 | 9  | 9  | 1 | 17 | 8 | 9  | 0 | 1272.82529 | 0.00833  | .01000 | 0.00405 | 0.02 |
| 1282: | 17 | 9  | 9  | 1 | 17 | 8 | 10 | 0 | 1272.82529 | 0.00833  | .01000 | 0.00405 | 0.03 |
| 1283: | 21 | 9  | 13 | 1 | 21 | 8 | 13 | 0 | 1272.82529 | 0.00090  | .01000 | 0.00405 | 0.02 |
| 1284: | 19 | 9  | 10 | 1 | 19 | 8 | 11 | 0 | 1272.82529 | 0.00374  | .01000 | 0.00405 | 0.03 |
| 1285: | 26 | 9  | 17 | 1 | 26 | 8 | 19 | 0 | 1272.82529 | 0.00645  | .01000 | 0.00405 | 0.02 |
| 1286: | 16 | 9  | 7  | 1 | 16 | 8 | 8  | 0 | 1272.82529 | 0.01108  | .01000 | 0.00405 | 0.03 |
| 1287: | 16 | 9  | 7  | 1 | 16 | 8 | 9  | 0 | 1272.82529 | 0.01108  | .01000 | 0.00405 | 0.02 |
| 1288: | 26 | 9  | 18 | 1 | 26 | 8 | 18 | 0 | 1272.82529 | 0.00675  | .01000 | 0.00405 | 0.02 |
| 1289: | 17 | 9  | 8  | 1 | 17 | 8 | 9  | 0 | 1272.82529 | 0.00833  | .01000 | 0.00405 | 0.03 |
| 1290: | 26 | 9  | 17 | 1 | 26 | 8 | 18 | 0 | 1272.82529 | 0.00673  | .01000 | 0.00405 | 0.03 |
| 1291: | 16 | 9  | 8  | 1 | 16 | 8 | 8  | 0 | 1272.82529 | 0.01108  | .01000 | 0.00405 | 0.02 |
| 1292: | 6  | 6  | 1  | 1 | 5  | 5 | 1  | 0 | 1273.00902 | 0.00195  | .01000 | 0.00230 | 0.15 |
| 1293: | 6  | 6  | 0  | 1 | 5  | 5 | 1  | 0 | 1273.00902 | 0.00195  | .01000 | 0.00230 | 0.22 |
| 1294: | 20 | 2  | 18 | 1 | 19 | 3 | 16 | 0 | 1273.00902 | 0.00446  | .01000 | 0.00230 | 0.12 |
| 1295: | 16 | 5  | 12 | 1 | 15 | 5 | 11 | 0 | 1273.00902 | 0.00232  | .01000 | 0.00230 | 0.14 |
| 1296: | 6  | 6  | 1  | 1 | 5  | 5 | 0  | 0 | 1273.00902 | 0.00195  | .01000 | 0.00230 | 0.22 |
| 1297: | 6  | 6  | 0  | 1 | 5  | 5 | 0  | 0 | 1273.00902 | 0.00195  | .01000 | 0.00230 | 0.15 |
| 1298: | 24 | 10 | 14 | 1 | 24 | 9 | 16 | 0 | 1273.61362 | 0.00604  | .01000 | 0.00879 | 0.02 |
| 1299: | 27 | 10 | 17 | 1 | 27 | 9 | 19 | 0 | 1273.61362 | 0.00440  | .01000 | 0.00879 | 0.02 |
| 1300: | 24 | 10 | 15 | 1 | 24 | 9 | 16 | 0 | 1273.61362 | 0.00604  | .01000 | 0.00879 | 0.03 |
| 1301: | 27 | 10 | 18 | 1 | 27 | 9 | 19 | 0 | 1273.61362 | 0.00440  | .01000 | 0.00879 | 0.03 |
| 1302: | 24 | 10 | 14 | 1 | 24 | 9 | 15 | 0 | 1273.61362 | 0.00604  | .01000 | 0.00879 | 0.03 |
| 1303: | 25 | 10 | 15 | 1 | 25 | 9 | 17 | 0 | 1273.61362 | 0.00482  | .01000 | 0.00879 | 0.02 |
| 1304: | 25 | 10 | 15 | 1 | 25 | 9 | 16 | 0 | 1273.61362 | 0.00483  | .01000 | 0.00879 | 0.03 |
| 1305: | 25 | 10 | 16 | 1 | 25 | 9 | 17 | 0 | 1273.61362 | 0.00482  | .01000 | 0.00879 | 0.03 |
| 1306: | 25 | 10 | 16 | 1 | 25 | 9 | 16 | 0 | 1273.61362 | 0.00483  | .01000 | 0.00879 | 0.02 |
| 1307: | 26 | 10 | 17 | 1 | 26 | 9 | 17 | 0 | 1273.61362 | 0.00426  | .01000 | 0.00879 | 0.02 |
| 1308: | 26 | 10 | 16 | 1 | 26 | 9 | 17 | 0 | 1273.61362 | 0.00426  | .01000 | 0.00879 | 0.03 |
| 1309: | 27 | 10 | 17 | 1 | 27 | 9 | 18 | 0 | 1273.61362 | 0.00442  | .01000 | 0.00879 | 0.03 |
| 1310: | 20 | 10 | 11 | 1 | 20 | 9 | 11 | 0 | 1273.61362 | 0.01569  | .01000 | 0.00879 | 0.02 |
| 1311: | 31 | 10 | 21 | 1 | 31 | 9 | 23 | 0 | 1273.61362 | 0.01428  | .01000 | 0.00879 | 0.01 |
| 1312: | 20 | 10 | 11 | 1 | 20 | 9 | 12 | 0 | 1273.61362 | 0.01569  | .01000 | 0.00879 | 0.02 |
| 1313: | 11 | 4  | 7  | 1 | 10 | 3 | 8  | 0 | 1273.61362 | 0.01903  | .01000 | 0.00879 | 0.02 |
| 1314: | 26 | 10 | 16 | 1 | 26 | 9 | 18 | 0 | 1273.61362 | 0.00425  | .01000 | 0.00879 | 0.02 |
| 1315: | 31 | 10 | 22 | 1 | 31 | 9 | 23 | 0 | 1273.61362 | 0.01429  | .01000 | 0.00879 | 0.03 |
| 1316: | 26 | 10 | 17 | 1 | 26 | 9 | 18 | 0 | 1273.61362 | 0.00425  | .01000 | 0.00879 | 0.03 |
| 1317: | 27 | 10 | 18 | 1 | 27 | 9 | 18 | 0 | 1273.61362 | 0.00442  | .01000 | 0.00879 | 0.02 |
| 1318: | 20 | 10 | 10 | 1 | 20 | 9 | 11 | 0 | 1273.61362 | 0.01569  | .01000 | 0.00879 | 0.02 |
| 1319: | 24 | 10 | 15 | 1 | 24 | 9 | 15 | 0 | 1273.61362 | 0.00604  | .01000 | 0.00879 | 0.02 |

|       |    |    |    |   |    |    |    |   |            |          |        |          |      |
|-------|----|----|----|---|----|----|----|---|------------|----------|--------|----------|------|
| 1320: | 20 | 10 | 10 | 1 | 20 | 9  | 12 | 0 | 1273.61362 | 0.01569  | .01000 | 0.00879  | 0.02 |
| 1321: | 21 | 10 | 12 | 1 | 21 | 9  | 12 | 0 | 1273.61362 | 0.01270  | .01000 | 0.00879  | 0.02 |
| 1322: | 21 | 10 | 11 | 1 | 21 | 9  | 13 | 0 | 1273.61362 | 0.01270  | .01000 | 0.00879  | 0.02 |
| 1323: | 30 | 10 | 21 | 1 | 30 | 9  | 21 | 0 | 1273.61362 | 0.01036  | .01000 | 0.00879  | 0.01 |
| 1324: | 31 | 10 | 22 | 1 | 31 | 9  | 22 | 0 | 1273.61362 | 0.01455  | .01000 | 0.00879  | 0.01 |
| 1325: | 30 | 10 | 21 | 1 | 30 | 9  | 22 | 0 | 1273.61362 | 0.01021  | .01000 | 0.00879  | 0.03 |
| 1326: | 28 | 10 | 18 | 1 | 28 | 9  | 20 | 0 | 1273.61362 | 0.00538  | .01000 | 0.00879  | 0.02 |
| 1327: | 30 | 10 | 20 | 1 | 30 | 9  | 21 | 0 | 1273.61362 | 0.01035  | .01000 | 0.00879  | 0.03 |
| 1328: | 28 | 10 | 19 | 1 | 28 | 9  | 19 | 0 | 1273.61362 | 0.00542  | .01000 | 0.00879  | 0.02 |
| 1329: | 28 | 10 | 19 | 1 | 28 | 9  | 20 | 0 | 1273.61362 | 0.00538  | .01000 | 0.00879  | 0.03 |
| 1330: | 28 | 10 | 18 | 1 | 28 | 9  | 19 | 0 | 1273.61362 | 0.00542  | .01000 | 0.00879  | 0.03 |
| 1331: | 21 | 10 | 11 | 1 | 21 | 9  | 12 | 0 | 1273.61362 | 0.01270  | .01000 | 0.00879  | 0.03 |
| 1332: | 30 | 10 | 20 | 1 | 30 | 9  | 22 | 0 | 1273.61362 | 0.01021  | .01000 | 0.00879  | 0.01 |
| 1333: | 23 | 10 | 13 | 1 | 23 | 9  | 15 | 0 | 1273.61362 | 0.00781  | .01000 | 0.00879  | 0.02 |
| 1334: | 22 | 10 | 12 | 1 | 22 | 9  | 14 | 0 | 1273.61362 | 0.01005  | .01000 | 0.00879  | 0.02 |
| 1335: | 22 | 10 | 13 | 1 | 22 | 9  | 13 | 0 | 1273.61362 | 0.01005  | .01000 | 0.00879  | 0.02 |
| 1336: | 21 | 10 | 12 | 1 | 21 | 9  | 13 | 0 | 1273.61362 | 0.01270  | .01000 | 0.00879  | 0.03 |
| 1337: | 22 | 10 | 13 | 1 | 22 | 9  | 14 | 0 | 1273.61362 | 0.01005  | .01000 | 0.00879  | 0.03 |
| 1338: | 22 | 10 | 12 | 1 | 22 | 9  | 13 | 0 | 1273.61362 | 0.01005  | .01000 | 0.00879  | 0.03 |
| 1339: | 31 | 10 | 21 | 1 | 31 | 9  | 22 | 0 | 1273.61362 | 0.01454  | .01000 | 0.00879  | 0.03 |
| 1340: | 23 | 10 | 14 | 1 | 23 | 9  | 15 | 0 | 1273.61362 | 0.00781  | .01000 | 0.00879  | 0.03 |
| 1341: | 29 | 10 | 20 | 1 | 29 | 9  | 20 | 0 | 1273.61362 | 0.00736  | .01000 | 0.00879  | 0.02 |
| 1342: | 29 | 10 | 19 | 1 | 29 | 9  | 20 | 0 | 1273.61362 | 0.00736  | .01000 | 0.00879  | 0.03 |
| 1343: | 29 | 10 | 20 | 1 | 29 | 9  | 21 | 0 | 1273.61362 | 0.00728  | .01000 | 0.00879  | 0.03 |
| 1344: | 29 | 10 | 19 | 1 | 29 | 9  | 21 | 0 | 1273.61362 | 0.00728  | .01000 | 0.00879  | 0.02 |
| 1345: | 23 | 10 | 14 | 1 | 23 | 9  | 14 | 0 | 1273.61362 | 0.00781  | .01000 | 0.00879  | 0.02 |
| 1346: | 23 | 10 | 13 | 1 | 23 | 9  | 14 | 0 | 1273.61362 | 0.00781  | .01000 | 0.00879  | 0.03 |
| 1347: | 37 | 13 | 24 | 1 | 37 | 12 | 25 | 0 | 1275.97579 | 0.00133  | .01000 | 0.00116  | 0.05 |
| 1348: | 24 | 0  | 24 | 1 | 23 | 0  | 23 | 0 | 1275.97579 | 0.00377  | .01000 | 0.00116  | 0.05 |
| 1349: | 37 | 13 | 25 | 1 | 37 | 12 | 26 | 0 | 1275.97579 | 0.00133  | .01000 | 0.00116  | 0.05 |
| 1350: | 37 | 13 | 25 | 1 | 37 | 12 | 25 | 0 | 1275.97579 | 0.00133  | .01000 | 0.00116  | 0.03 |
| 1351: | 41 | 13 | 29 | 1 | 41 | 12 | 30 | 0 | 1275.97579 | 0.00086  | .01000 | 0.00116  | 0.05 |
| 1352: | 24 | 0  | 24 | 1 | 23 | 1  | 23 | 0 | 1275.97579 | 0.00413  | .01000 | 0.00116  | 0.09 |
| 1353: | 24 | 1  | 24 | 1 | 23 | 0  | 23 | 0 | 1275.97579 | 0.00354  | .01000 | 0.00116  | 0.09 |
| 1354: | 24 | 1  | 24 | 1 | 23 | 1  | 23 | 0 | 1275.97579 | 0.00389  | .01000 | 0.00116  | 0.05 |
| 1355: | 41 | 13 | 28 | 1 | 41 | 12 | 29 | 0 | 1275.97579 | 0.00087  | .01000 | 0.00116  | 0.05 |
| 1356: | 38 | 13 | 26 | 1 | 38 | 12 | 26 | 0 | 1275.97579 | 0.00010  | .01000 | 0.00116  | 0.03 |
| 1357: | 38 | 13 | 25 | 1 | 38 | 12 | 26 | 0 | 1275.97579 | 0.00010  | .01000 | 0.00116  | 0.05 |
| 1358: | 38 | 13 | 25 | 1 | 38 | 12 | 27 | 0 | 1275.97579 | 0.00009  | .01000 | 0.00116  | 0.03 |
| 1359: | 38 | 13 | 26 | 1 | 38 | 12 | 27 | 0 | 1275.97579 | 0.00009  | .01000 | 0.00116  | 0.05 |
| 1360: | 40 | 13 | 27 | 1 | 40 | 12 | 28 | 0 | 1275.97579 | -0.00020 | .01000 | 0.00116  | 0.05 |
| 1361: | 28 | 4  | 24 | 1 | 27 | 5  | 22 | 0 | 1275.97579 | -0.00070 | .01000 | 0.00116  | 0.03 |
| 1362: | 39 | 13 | 26 | 1 | 39 | 12 | 27 | 0 | 1275.97579 | -0.00044 | .01000 | 0.00116  | 0.05 |
| 1363: | 37 | 13 | 24 | 1 | 37 | 12 | 26 | 0 | 1275.97579 | 0.00133  | .01000 | 0.00116  | 0.03 |
| 1364: | 40 | 13 | 28 | 1 | 40 | 12 | 29 | 0 | 1275.97579 | -0.00021 | .01000 | 0.00116  | 0.05 |
| 1365: | 13 | 6  | 8  | 1 | 12 | 5  | 7  | 0 | 1275.97579 | -0.00215 | .01000 | 0.00116  | 0.06 |
| 1366: | 39 | 13 | 27 | 1 | 39 | 12 | 28 | 0 | 1275.97579 | -0.00044 | .01000 | 0.00116  | 0.05 |
| 1367: | 10 | 8  | 2  | 1 | 9  | 7  | 3  | 0 | 1276.24778 | 0.00145  | .01000 | 0.00011  | 0.23 |
| 1368: | 10 | 8  | 2  | 1 | 9  | 7  | 2  | 0 | 1276.24778 | 0.00145  | .01000 | 0.00011  | 0.15 |
| 1369: | 10 | 8  | 3  | 1 | 9  | 7  | 3  | 0 | 1276.24778 | 0.00145  | .01000 | 0.00011  | 0.15 |
| 1370: | 10 | 8  | 3  | 1 | 9  | 7  | 2  | 0 | 1276.24778 | 0.00145  | .01000 | 0.00011  | 0.23 |
| 1371: | 38 | 8  | 31 | 1 | 37 | 9  | 28 | 0 | 1276.24778 | -0.00592 | .01000 | 0.00011  | 0.11 |
| 1372: | 35 | 6  | 30 | 1 | 34 | 7  | 27 | 0 | 1276.24778 | -0.00335 | .01000 | 0.00011  | 0.11 |
| 1373: | 25 | 9  | 17 | 1 | 24 | 9  | 16 | 0 | 1276.82589 | -0.00250 | .01000 | 0.00078  | 0.12 |
| 1374: | 15 | 6  | 9  | 1 | 14 | 5  | 10 | 0 | 1276.82589 | 0.00033  | .01000 | 0.00078  | 0.19 |
| 1375: | 15 | 6  | 10 | 1 | 14 | 5  | 10 | 0 | 1276.82589 | 0.00043  | .01000 | 0.00078  | 0.13 |
| 1376: | 17 | 5  | 12 | 1 | 16 | 4  | 12 | 0 | 1276.82589 | 0.00490  | .01000 | 0.00078  | 0.13 |
| 1377: | 15 | 6  | 9  | 1 | 14 | 5  | 9  | 0 | 1276.82589 | 0.00192  | .01000 | 0.00078  | 0.13 |
| 1378: | 25 | 9  | 16 | 1 | 24 | 9  | 15 | 0 | 1276.82589 | -0.00250 | .01000 | 0.00078  | 0.12 |
| 1379: | 15 | 6  | 10 | 1 | 14 | 5  | 9  | 0 | 1276.82589 | 0.00202  | .01000 | 0.00078  | 0.19 |
| 1380: | 11 | 9  | 2  | 1 | 10 | 8  | 3  | 0 | 1277.43958 | -0.00008 | .01000 | 0.00018  | 0.13 |
| 1381: | 24 | 15 | 10 | 1 | 24 | 14 | 10 | 0 | 1277.43958 | -0.00292 | .01000 | 0.00018  | 0.06 |
| 1382: | 24 | 15 | 9  | 1 | 24 | 14 | 10 | 0 | 1277.43958 | -0.00292 | .01000 | 0.00018  | 0.09 |
| 1383: | 24 | 15 | 9  | 1 | 24 | 14 | 11 | 0 | 1277.43958 | -0.00292 | .01000 | 0.00018  | 0.06 |
| 1384: | 24 | 15 | 10 | 1 | 24 | 14 | 11 | 0 | 1277.43958 | -0.00292 | .01000 | 0.00018  | 0.09 |
| 1385: | 11 | 9  | 2  | 1 | 10 | 8  | 2  | 0 | 1277.43958 | -0.00008 | .01000 | 0.00018  | 0.08 |
| 1386: | 11 | 9  | 3  | 1 | 10 | 8  | 2  | 0 | 1277.43958 | -0.00008 | .01000 | 0.00018  | 0.13 |
| 1387: | 11 | 9  | 3  | 1 | 10 | 8  | 3  | 0 | 1277.43958 | -0.00008 | .01000 | 0.00018  | 0.08 |
| 1388: | 23 | 15 | 8  | 1 | 23 | 14 | 9  | 0 | 1277.43958 | 0.00370  | .01000 | 0.00018  | 0.09 |
| 1389: | 23 | 15 | 8  | 1 | 23 | 14 | 10 | 0 | 1277.43958 | 0.00370  | .01000 | 0.00018  | 0.06 |
| 1390: | 23 | 15 | 9  | 1 | 23 | 14 | 9  | 0 | 1277.43958 | 0.00370  | .01000 | 0.00018  | 0.06 |
| 1391: | 23 | 15 | 9  | 1 | 23 | 14 | 10 | 0 | 1277.43958 | 0.00370  | .01000 | 0.00018  | 0.09 |
| 1392: | 26 | 16 | 10 | 1 | 26 | 15 | 11 | 0 | 1278.20073 | -0.01316 | .01000 | -0.00724 | 0.07 |
| 1393: | 25 | 16 | 9  | 1 | 25 | 15 | 11 | 0 | 1278.20073 | -0.00594 | .01000 | -0.00724 | 0.04 |
| 1394: | 25 | 16 | 10 | 1 | 25 | 15 | 10 | 0 | 1278.20073 | -0.00594 | .01000 | -0.00724 | 0.04 |
| 1395: | 11 | 10 | 2  | 1 | 10 | 9  | 2  | 0 | 1278.20073 | -0.00505 | .01000 | -0.00724 | 0.07 |
| 1396: | 25 | 16 | 9  | 1 | 25 | 15 | 10 | 0 | 1278.20073 | -0.00594 | .01000 | -0.00724 | 0.07 |
| 1397: | 26 | 16 | 11 | 1 | 26 | 15 | 11 | 0 | 1278.20073 | -0.01316 | .01000 | -0.00724 | 0.04 |

|       |    |    |    |   |    |    |    |   |            |          |        |          |      |
|-------|----|----|----|---|----|----|----|---|------------|----------|--------|----------|------|
| 1398: | 11 | 10 | 2  | 1 | 10 | 9  | 1  | 0 | 1278.20073 | -0.00505 | .01000 | -0.00724 | 0.11 |
| 1399: | 28 | 5  | 24 | 1 | 27 | 5  | 23 | 0 | 1278.20073 | -0.00454 | .01000 | -0.00724 | 0.06 |
| 1400: | 11 | 10 | 1  | 1 | 10 | 9  | 1  | 0 | 1278.20073 | -0.00505 | .01000 | -0.00724 | 0.07 |
| 1401: | 11 | 10 | 1  | 1 | 10 | 9  | 2  | 0 | 1278.20073 | -0.00505 | .01000 | -0.00724 | 0.11 |
| 1402: | 26 | 16 | 10 | 1 | 26 | 15 | 12 | 0 | 1278.20073 | -0.01316 | .01000 | -0.00724 | 0.04 |
| 1403: | 26 | 16 | 11 | 1 | 26 | 15 | 12 | 0 | 1278.20073 | -0.01316 | .01000 | -0.00724 | 0.07 |
| 1404: | 25 | 16 | 10 | 1 | 25 | 15 | 11 | 0 | 1278.20073 | -0.00594 | .01000 | -0.00724 | 0.07 |
| 1405: | 20 | 5  | 16 | 1 | 19 | 4  | 16 | 0 | 1278.20073 | -0.00012 | .01000 | -0.00724 | 0.06 |
| 1406: | 28 | 3  | 25 | 1 | 27 | 3  | 24 | 0 | 1278.20073 | -0.01211 | .01000 | -0.00724 | 0.06 |
| 1407: | 18 | 10 | 9  | 1 | 17 | 9  | 9  | 0 | 1281.19004 | -0.00127 | .01000 | -0.00172 | 0.14 |
| 1408: | 18 | 10 | 8  | 1 | 17 | 9  | 9  | 0 | 1281.19004 | -0.00127 | .01000 | -0.00172 | 0.20 |
| 1409: | 18 | 10 | 9  | 1 | 17 | 9  | 8  | 0 | 1281.19004 | -0.00127 | .01000 | -0.00172 | 0.20 |
| 1410: | 23 | 20 | 3  | 1 | 23 | 19 | 4  | 0 | 1281.19004 | -0.00427 | .01000 | -0.00172 | 0.10 |
| 1411: | 18 | 10 | 8  | 1 | 17 | 9  | 8  | 0 | 1281.19004 | -0.00127 | .01000 | -0.00172 | 0.14 |
| 1412: | 23 | 20 | 4  | 1 | 23 | 19 | 5  | 0 | 1281.19004 | -0.00427 | .01000 | -0.00172 | 0.10 |
| 1413: | 26 | 6  | 20 | 1 | 25 | 5  | 20 | 0 | 1281.19004 | -0.00030 | .01000 | -0.00172 | 0.13 |
| 1414: | 22 | 8  | 15 | 1 | 21 | 7  | 15 | 0 | 1281.34627 | -0.00400 | .01000 | -0.00182 | 0.08 |
| 1415: | 22 | 8  | 14 | 1 | 21 | 7  | 15 | 0 | 1281.34627 | -0.00402 | .01000 | -0.00182 | 0.12 |
| 1416: | 13 | 13 | 0  | 1 | 12 | 12 | 1  | 0 | 1281.34627 | 0.00094  | .01000 | -0.00182 | 0.14 |
| 1417: | 13 | 13 | 0  | 1 | 12 | 12 | 0  | 0 | 1281.34627 | 0.00094  | .01000 | -0.00182 | 0.09 |
| 1418: | 22 | 8  | 14 | 1 | 21 | 7  | 14 | 0 | 1281.34627 | -0.00374 | .01000 | -0.00182 | 0.08 |
| 1419: | 13 | 13 | 1  | 1 | 12 | 12 | 0  | 0 | 1281.34627 | 0.00094  | .01000 | -0.00182 | 0.14 |
| 1420: | 40 | 20 | 21 | 1 | 40 | 19 | 22 | 0 | 1281.34627 | -0.00526 | .01000 | -0.00182 | 0.07 |
| 1421: | 40 | 20 | 20 | 1 | 40 | 19 | 21 | 0 | 1281.34627 | -0.00526 | .01000 | -0.00182 | 0.07 |
| 1422: | 13 | 13 | 1  | 1 | 12 | 12 | 1  | 0 | 1281.34627 | 0.00094  | .01000 | -0.00182 | 0.09 |
| 1423: | 22 | 8  | 15 | 1 | 21 | 7  | 14 | 0 | 1281.34627 | -0.00372 | .01000 | -0.00182 | 0.12 |
| 1424: | 14 | 13 | 1  | 1 | 13 | 12 | 2  | 0 | 1281.77510 | 0.00328  | .01000 | 0.00271  | 0.15 |
| 1425: | 37 | 4  | 33 | 1 | 36 | 5  | 32 | 0 | 1281.77510 | 0.00290  | .01000 | 0.00271  | 0.11 |
| 1426: | 23 | 8  | 16 | 1 | 22 | 7  | 15 | 0 | 1281.77510 | 0.00227  | .01000 | 0.00271  | 0.12 |
| 1427: | 23 | 8  | 15 | 1 | 22 | 7  | 15 | 0 | 1281.77510 | 0.00223  | .01000 | 0.00271  | 0.08 |
| 1428: | 14 | 13 | 1  | 1 | 13 | 12 | 1  | 0 | 1281.77510 | 0.00328  | .01000 | 0.00271  | 0.10 |
| 1429: | 23 | 8  | 16 | 1 | 22 | 7  | 16 | 0 | 1281.77510 | 0.00174  | .01000 | 0.00271  | 0.08 |
| 1430: | 23 | 8  | 15 | 1 | 22 | 7  | 16 | 0 | 1281.77510 | 0.00170  | .01000 | 0.00271  | 0.12 |
| 1431: | 14 | 13 | 2  | 1 | 13 | 12 | 1  | 0 | 1281.77510 | 0.00328  | .01000 | 0.00271  | 0.15 |
| 1432: | 14 | 13 | 2  | 1 | 13 | 12 | 2  | 0 | 1281.77510 | 0.00328  | .01000 | 0.00271  | 0.10 |
| 1433: | 35 | 7  | 28 | 1 | 34 | 6  | 28 | 0 | 1285.37944 | -0.00350 | .01000 | -0.00449 | 0.08 |
| 1434: | 34 | 5  | 30 | 1 | 33 | 4  | 30 | 0 | 1285.37944 | -0.00594 | .01000 | -0.00449 | 0.08 |
| 1435: | 46 | 2  | 44 | 1 | 45 | 3  | 43 | 0 | 1285.37944 | -0.01187 | .01000 | -0.00449 | 0.13 |
| 1436: | 46 | 3  | 44 | 1 | 45 | 3  | 43 | 0 | 1285.37944 | -0.01190 | .01000 | -0.00449 | 0.07 |
| 1437: | 26 | 11 | 15 | 1 | 25 | 10 | 15 | 0 | 1285.37944 | 0.00186  | .01000 | -0.00449 | 0.09 |
| 1438: | 26 | 11 | 16 | 1 | 25 | 10 | 15 | 0 | 1285.37944 | 0.00186  | .01000 | -0.00449 | 0.14 |
| 1439: | 26 | 11 | 15 | 1 | 25 | 10 | 16 | 0 | 1285.37944 | 0.00186  | .01000 | -0.00449 | 0.14 |
| 1440: | 46 | 2  | 44 | 1 | 45 | 2  | 43 | 0 | 1285.37944 | -0.01192 | .01000 | -0.00449 | 0.07 |
| 1441: | 46 | 3  | 44 | 1 | 45 | 2  | 43 | 0 | 1285.37944 | -0.01196 | .01000 | -0.00449 | 0.13 |
| 1442: | 26 | 11 | 16 | 1 | 25 | 10 | 16 | 0 | 1285.37944 | 0.00186  | .01000 | -0.00449 | 0.09 |
| 1443: | 12 | 8  | 5  | 1 | 11 | 7  | 5  | 0 | 1277.09820 | 0.00087  | .00400 | 0.00066  | 0.17 |
| 1444: | 37 | 7  | 30 | 1 | 36 | 8  | 29 | 0 | 1277.09820 | -0.00076 | .00400 | 0.00066  | 0.13 |
| 1445: | 12 | 8  | 4  | 1 | 11 | 7  | 4  | 0 | 1277.09820 | 0.00087  | .00400 | 0.00066  | 0.17 |
| 1446: | 12 | 8  | 4  | 1 | 11 | 7  | 5  | 0 | 1277.09820 | 0.00087  | .00400 | 0.00066  | 0.26 |
| 1447: | 12 | 8  | 5  | 1 | 11 | 7  | 4  | 0 | 1277.09820 | 0.00087  | .00400 | 0.00066  | 0.26 |
| 1448: | 14 | 7  | 8  | 1 | 13 | 6  | 7  | 0 | 1277.17657 | -0.00096 | .00400 | -0.00087 | 0.23 |
| 1449: | 26 | 13 | 13 | 1 | 25 | 13 | 12 | 0 | 1277.17657 | -0.00056 | .00400 | -0.00087 | 0.12 |
| 1450: | 14 | 7  | 8  | 1 | 13 | 6  | 8  | 0 | 1277.17657 | -0.00098 | .00400 | -0.00087 | 0.15 |
| 1451: | 14 | 7  | 7  | 1 | 13 | 6  | 7  | 0 | 1277.17657 | -0.00096 | .00400 | -0.00087 | 0.15 |
| 1452: | 26 | 13 | 14 | 1 | 25 | 13 | 13 | 0 | 1277.17657 | -0.00056 | .00400 | -0.00087 | 0.12 |
| 1453: | 14 | 7  | 7  | 1 | 13 | 6  | 8  | 0 | 1277.17657 | -0.00098 | .00400 | -0.00087 | 0.23 |
| 1454: | 17 | 7  | 10 | 1 | 16 | 6  | 10 | 0 | 1278.44954 | -0.00177 | .00400 | -0.00206 | 0.16 |
| 1455: | 17 | 7  | 11 | 1 | 16 | 6  | 11 | 0 | 1278.44954 | -0.00199 | .00400 | -0.00206 | 0.16 |
| 1456: | 29 | 14 | 16 | 1 | 28 | 14 | 15 | 0 | 1278.44954 | -0.00265 | .00400 | -0.00206 | 0.12 |
| 1457: | 29 | 14 | 15 | 1 | 28 | 14 | 14 | 0 | 1278.44954 | -0.00265 | .00400 | -0.00206 | 0.12 |
| 1458: | 17 | 7  | 10 | 1 | 16 | 6  | 11 | 0 | 1278.44954 | -0.00200 | .00400 | -0.00206 | 0.23 |
| 1459: | 17 | 7  | 11 | 1 | 16 | 6  | 10 | 0 | 1278.44954 | -0.00176 | .00400 | -0.00206 | 0.23 |
| 1460: | 12 | 11 | 2  | 1 | 11 | 10 | 2  | 0 | 1279.39843 | 0.00246  | .00400 | 0.00324  | 0.15 |
| 1461: | 12 | 11 | 2  | 1 | 11 | 10 | 1  | 0 | 1279.39843 | 0.00246  | .00400 | 0.00324  | 0.23 |
| 1462: | 12 | 11 | 1  | 1 | 11 | 10 | 2  | 0 | 1279.39843 | 0.00246  | .00400 | 0.00324  | 0.23 |
| 1463: | 31 | 11 | 20 | 1 | 30 | 11 | 19 | 0 | 1279.39843 | 0.00586  | .00400 | 0.00324  | 0.11 |
| 1464: | 31 | 11 | 21 | 1 | 30 | 11 | 20 | 0 | 1279.39843 | 0.00586  | .00400 | 0.00324  | 0.11 |
| 1465: | 12 | 11 | 1  | 1 | 11 | 10 | 1  | 0 | 1279.39843 | 0.00246  | .00400 | 0.00324  | 0.15 |
| 1466: | 14 | 10 | 4  | 1 | 13 | 9  | 4  | 0 | 1279.48843 | 0.00437  | .00400 | 0.00437  | 0.20 |
| 1467: | 14 | 10 | 5  | 1 | 13 | 9  | 4  | 0 | 1279.48843 | 0.00437  | .00400 | 0.00437  | 0.30 |
| 1468: | 14 | 10 | 5  | 1 | 13 | 9  | 5  | 0 | 1279.48843 | 0.00437  | .00400 | 0.00437  | 0.20 |
| 1469: | 14 | 10 | 4  | 1 | 13 | 9  | 5  | 0 | 1279.48843 | 0.00437  | .00400 | 0.00437  | 0.30 |
| 1470: | 18 | 8  | 10 | 1 | 17 | 7  | 10 | 0 | 1279.65444 | 0.00250  | .00400 | 0.00151  | 0.16 |
| 1471: | 18 | 8  | 11 | 1 | 17 | 7  | 11 | 0 | 1279.65444 | 0.00249  | .00400 | 0.00151  | 0.16 |
| 1472: | 18 | 8  | 10 | 1 | 17 | 7  | 11 | 0 | 1279.65444 | 0.00249  | .00400 | 0.00151  | 0.23 |
| 1473: | 18 | 8  | 11 | 1 | 17 | 7  | 10 | 0 | 1279.65444 | 0.00250  | .00400 | 0.00151  | 0.23 |
| 1474: | 32 | 3  | 29 | 1 | 31 | 4  | 28 | 0 | 1279.65444 | -0.00182 | .00400 | 0.00151  | 0.23 |
| 1475: | 19 | 9  | 10 | 1 | 18 | 8  | 11 | 0 | 1280.84824 | -0.00154 | .00400 | -0.00155 | 0.30 |

|       |    |    |    |   |    |    |    |   |            |          |        |          |      |
|-------|----|----|----|---|----|----|----|---|------------|----------|--------|----------|------|
| 1476: | 19 | 9  | 11 | 1 | 18 | 8  | 11 | 0 | 1280.84824 | -0.00154 | .00400 | -0.00155 | 0.20 |
| 1477: | 19 | 9  | 10 | 1 | 18 | 8  | 10 | 0 | 1280.84824 | -0.00154 | .00400 | -0.00155 | 0.20 |
| 1478: | 19 | 9  | 11 | 1 | 18 | 8  | 10 | 0 | 1280.84824 | -0.00154 | .00400 | -0.00155 | 0.30 |
| 1479: | 19 | 11 | 9  | 1 | 18 | 10 | 9  | 0 | 1282.38672 | 0.00261  | .00400 | 0.00261  | 0.20 |
| 1480: | 19 | 11 | 9  | 1 | 18 | 10 | 8  | 0 | 1282.38672 | 0.00261  | .00400 | 0.00261  | 0.30 |
| 1481: | 19 | 11 | 8  | 1 | 18 | 10 | 9  | 0 | 1282.38672 | 0.00261  | .00400 | 0.00261  | 0.30 |
| 1482: | 19 | 11 | 8  | 1 | 18 | 10 | 8  | 0 | 1282.38672 | 0.00261  | .00400 | 0.00261  | 0.20 |
| 1483: | 19 | 12 | 8  | 1 | 18 | 11 | 7  | 0 | 1283.14767 | 0.00026  | .00400 | -0.00047 | 0.16 |
| 1484: | 19 | 12 | 8  | 1 | 18 | 11 | 8  | 0 | 1283.14767 | 0.00026  | .00400 | -0.00047 | 0.10 |
| 1485: | 19 | 12 | 7  | 1 | 18 | 11 | 7  | 0 | 1283.14767 | 0.00026  | .00400 | -0.00047 | 0.10 |
| 1486: | 41 | 2  | 40 | 1 | 40 | 2  | 39 | 0 | 1283.14767 | -0.00127 | .00400 | -0.00047 | 0.08 |
| 1487: | 41 | 2  | 40 | 1 | 40 | 1  | 39 | 0 | 1283.14767 | -0.00129 | .00400 | -0.00047 | 0.16 |
| 1488: | 41 | 1  | 40 | 1 | 40 | 1  | 39 | 0 | 1283.14767 | -0.00128 | .00400 | -0.00047 | 0.08 |
| 1489: | 41 | 1  | 40 | 1 | 40 | 2  | 39 | 0 | 1283.14767 | -0.00127 | .00400 | -0.00047 | 0.16 |
| 1490: | 19 | 12 | 7  | 1 | 18 | 11 | 8  | 0 | 1283.14767 | 0.00026  | .00400 | -0.00047 | 0.16 |
| 1491: | 40 | 9  | 32 | 1 | 39 | 9  | 31 | 0 | 1283.40828 | -0.00516 | .00400 | 0.00520  | 0.07 |
| 1492: | 42 | 1  | 42 | 1 | 41 | 0  | 41 | 0 | 1283.40828 | 0.00678  | .00400 | 0.00520  | 0.16 |
| 1493: | 42 | 0  | 42 | 1 | 41 | 0  | 41 | 0 | 1283.40828 | 0.00678  | .00400 | 0.00520  | 0.08 |
| 1494: | 42 | 1  | 42 | 1 | 41 | 1  | 41 | 0 | 1283.40828 | 0.00678  | .00400 | 0.00520  | 0.08 |
| 1495: | 25 | 9  | 16 | 1 | 24 | 8  | 16 | 0 | 1283.40828 | 0.00520  | .00400 | 0.00520  | 0.09 |
| 1496: | 42 | 0  | 42 | 1 | 41 | 1  | 41 | 0 | 1283.40828 | 0.00678  | .00400 | 0.00520  | 0.16 |
| 1497: | 25 | 9  | 16 | 1 | 24 | 8  | 17 | 0 | 1283.40828 | 0.00512  | .00400 | 0.00520  | 0.13 |
| 1498: | 25 | 9  | 17 | 1 | 24 | 8  | 17 | 0 | 1283.40828 | 0.00513  | .00400 | 0.00520  | 0.09 |
| 1499: | 25 | 9  | 17 | 1 | 24 | 8  | 16 | 0 | 1283.40828 | 0.00521  | .00400 | 0.00520  | 0.13 |
| 1500: | 33 | 7  | 27 | 1 | 32 | 6  | 27 | 0 | 1285.21241 | 0.00260  | .00400 | 0.00148  | 0.51 |
| 1501: | 46 | 6  | 40 | 1 | 45 | 7  | 39 | 0 | 1285.21241 | 0.00031  | .00400 | 0.00148  | 0.49 |
| 1502: | 25 | 15 | 10 | 1 | 24 | 14 | 11 | 0 | 1287.99314 | -0.00409 | .00400 | -0.00231 | 0.17 |
| 1503: | 25 | 15 | 11 | 1 | 24 | 14 | 10 | 0 | 1287.99314 | -0.00409 | .00400 | -0.00231 | 0.17 |
| 1504: | 25 | 15 | 10 | 1 | 24 | 14 | 10 | 0 | 1287.99314 | -0.00409 | .00400 | -0.00231 | 0.11 |
| 1505: | 25 | 15 | 11 | 1 | 24 | 14 | 11 | 0 | 1287.99314 | -0.00409 | .00400 | -0.00231 | 0.11 |
| 1506: | 34 | 10 | 24 | 1 | 33 | 9  | 25 | 0 | 1287.99314 | -0.00056 | .00400 | -0.00231 | 0.13 |
| 1507: | 34 | 10 | 25 | 1 | 33 | 9  | 24 | 0 | 1287.99314 | 0.00030  | .00400 | -0.00231 | 0.13 |
| 1508: | 34 | 10 | 24 | 1 | 33 | 9  | 24 | 0 | 1287.99314 | 0.00023  | .00400 | -0.00231 | 0.09 |
| 1509: | 34 | 10 | 25 | 1 | 33 | 9  | 25 | 0 | 1287.99314 | -0.00049 | .00400 | -0.00231 | 0.09 |
| 1510: | 27 | 15 | 12 | 1 | 26 | 14 | 12 | 0 | 1288.85621 | -0.00016 | .00400 | -0.00120 | 0.09 |
| 1511: | 27 | 15 | 13 | 1 | 26 | 14 | 13 | 0 | 1288.85621 | -0.00016 | .00400 | -0.00120 | 0.09 |
| 1512: | 27 | 15 | 12 | 1 | 26 | 14 | 13 | 0 | 1288.85621 | -0.00016 | .00400 | -0.00120 | 0.14 |
| 1513: | 20 | 19 | 1  | 1 | 19 | 18 | 1  | 0 | 1288.85621 | -0.00215 | .00400 | -0.00120 | 0.10 |
| 1514: | 20 | 19 | 1  | 1 | 19 | 18 | 2  | 0 | 1288.85621 | -0.00215 | .00400 | -0.00120 | 0.16 |
| 1515: | 20 | 19 | 2  | 1 | 19 | 18 | 2  | 0 | 1288.85621 | -0.00215 | .00400 | -0.00120 | 0.10 |
| 1516: | 27 | 15 | 13 | 1 | 26 | 14 | 12 | 0 | 1288.85621 | -0.00016 | .00400 | -0.00120 | 0.14 |
| 1517: | 20 | 19 | 2  | 1 | 19 | 18 | 1  | 0 | 1288.85621 | -0.00215 | .00400 | -0.00120 | 0.16 |
| 1518: | 29 | 15 | 15 | 1 | 28 | 14 | 15 | 0 | 1289.71681 | 0.00080  | .00400 | 0.00085  | 0.09 |
| 1519: | 22 | 19 | 3  | 1 | 21 | 18 | 3  | 0 | 1289.71681 | 0.00089  | .00400 | 0.00085  | 0.10 |
| 1520: | 22 | 19 | 3  | 1 | 21 | 18 | 4  | 0 | 1289.71681 | 0.00089  | .00400 | 0.00085  | 0.16 |
| 1521: | 22 | 19 | 4  | 1 | 21 | 18 | 3  | 0 | 1289.71681 | 0.00089  | .00400 | 0.00085  | 0.16 |
| 1522: | 22 | 19 | 4  | 1 | 21 | 18 | 4  | 0 | 1289.71681 | 0.00089  | .00400 | 0.00085  | 0.10 |
| 1523: | 29 | 15 | 15 | 1 | 28 | 14 | 14 | 0 | 1289.71681 | 0.00080  | .00400 | 0.00085  | 0.14 |
| 1524: | 29 | 15 | 14 | 1 | 28 | 14 | 15 | 0 | 1289.71681 | 0.00080  | .00400 | 0.00085  | 0.14 |
| 1525: | 29 | 15 | 14 | 1 | 28 | 14 | 14 | 0 | 1289.71681 | 0.00080  | .00400 | 0.00085  | 0.09 |
| 1526: | 23 | 19 | 4  | 1 | 22 | 18 | 5  | 0 | 1290.14787 | 0.00275  | .00400 | 0.00235  | 0.16 |
| 1527: | 23 | 19 | 5  | 1 | 22 | 18 | 4  | 0 | 1290.14787 | 0.00275  | .00400 | 0.00235  | 0.16 |
| 1528: | 23 | 19 | 4  | 1 | 22 | 18 | 4  | 0 | 1290.14787 | 0.00275  | .00400 | 0.00235  | 0.10 |
| 1529: | 30 | 15 | 15 | 1 | 29 | 14 | 16 | 0 | 1290.14787 | 0.00190  | .00400 | 0.00235  | 0.14 |
| 1530: | 30 | 15 | 15 | 1 | 29 | 14 | 15 | 0 | 1290.14787 | 0.00190  | .00400 | 0.00235  | 0.09 |
| 1531: | 23 | 19 | 5  | 1 | 22 | 18 | 5  | 0 | 1290.14787 | 0.00275  | .00400 | 0.00235  | 0.10 |
| 1532: | 30 | 15 | 16 | 1 | 29 | 14 | 15 | 0 | 1290.14787 | 0.00190  | .00400 | 0.00235  | 0.14 |
| 1533: | 30 | 15 | 16 | 1 | 29 | 14 | 16 | 0 | 1290.14787 | 0.00190  | .00400 | 0.00235  | 0.09 |
| 1534: | 25 | 18 | 8  | 1 | 24 | 17 | 7  | 0 | 1290.25668 | 0.00059  | .00400 | 0.00059  | 0.30 |
| 1535: | 25 | 18 | 7  | 1 | 24 | 17 | 8  | 0 | 1290.25668 | 0.00059  | .00400 | 0.00059  | 0.30 |
| 1536: | 25 | 18 | 7  | 1 | 24 | 17 | 7  | 0 | 1290.25668 | 0.00059  | .00400 | 0.00059  | 0.20 |
| 1537: | 25 | 18 | 8  | 1 | 24 | 17 | 8  | 0 | 1290.25668 | 0.00059  | .00400 | 0.00059  | 0.20 |
| 1538: | 34 | 15 | 19 | 1 | 33 | 14 | 20 | 0 | 1291.86234 | -0.00383 | .00400 | -0.00292 | 0.14 |
| 1539: | 34 | 15 | 20 | 1 | 33 | 14 | 19 | 0 | 1291.86234 | -0.00383 | .00400 | -0.00292 | 0.14 |
| 1540: | 34 | 15 | 20 | 1 | 33 | 14 | 20 | 0 | 1291.86234 | -0.00383 | .00400 | -0.00292 | 0.09 |
| 1541: | 34 | 15 | 19 | 1 | 33 | 14 | 19 | 0 | 1291.86234 | -0.00383 | .00400 | -0.00292 | 0.09 |
| 1542: | 27 | 19 | 8  | 1 | 26 | 18 | 8  | 0 | 1291.86234 | -0.00211 | .00400 | -0.00292 | 0.11 |
| 1543: | 27 | 19 | 8  | 1 | 26 | 18 | 9  | 0 | 1291.86234 | -0.00211 | .00400 | -0.00292 | 0.16 |
| 1544: | 27 | 19 | 9  | 1 | 26 | 18 | 8  | 0 | 1291.86234 | -0.00211 | .00400 | -0.00292 | 0.16 |
| 1545: | 27 | 19 | 9  | 1 | 26 | 18 | 9  | 0 | 1291.86234 | -0.00211 | .00400 | -0.00292 | 0.11 |
| 1546: | 28 | 19 | 9  | 1 | 27 | 18 | 10 | 0 | 1292.29436 | -0.00051 | .00400 | -0.00112 | 0.16 |
| 1547: | 28 | 19 | 9  | 1 | 27 | 18 | 9  | 0 | 1292.29436 | -0.00051 | .00400 | -0.00112 | 0.11 |
| 1548: | 35 | 15 | 21 | 1 | 34 | 14 | 21 | 0 | 1292.29436 | -0.00182 | .00400 | -0.00112 | 0.09 |
| 1549: | 35 | 15 | 21 | 1 | 34 | 14 | 20 | 0 | 1292.29436 | -0.00182 | .00400 | -0.00112 | 0.14 |
| 1550: | 28 | 19 | 10 | 1 | 27 | 18 | 10 | 0 | 1292.29436 | -0.00051 | .00400 | -0.00112 | 0.11 |
| 1551: | 28 | 19 | 10 | 1 | 27 | 18 | 9  | 0 | 1292.29436 | -0.00051 | .00400 | -0.00112 | 0.16 |
| 1552: | 35 | 15 | 20 | 1 | 34 | 14 | 21 | 0 | 1292.29436 | -0.00182 | .00400 | -0.00112 | 0.14 |
| 1553: | 35 | 15 | 20 | 1 | 34 | 14 | 20 | 0 | 1292.29436 | -0.00182 | .00400 | -0.00112 | 0.09 |

|       |    |    |    |   |    |    |    |   |            |          |        |          |      |
|-------|----|----|----|---|----|----|----|---|------------|----------|--------|----------|------|
| 1554: | 37 | 15 | 22 | 1 | 36 | 14 | 22 | 0 | 1293.15533 | -0.00064 | .00400 | -0.00084 | 0.09 |
| 1555: | 30 | 19 | 11 | 1 | 29 | 18 | 11 | 0 | 1293.15533 | -0.00101 | .00400 | -0.00084 | 0.11 |
| 1556: | 37 | 15 | 23 | 1 | 36 | 14 | 22 | 0 | 1293.15533 | -0.00064 | .00400 | -0.00084 | 0.14 |
| 1557: | 37 | 15 | 22 | 1 | 36 | 14 | 23 | 0 | 1293.15533 | -0.00064 | .00400 | -0.00084 | 0.14 |
| 1558: | 30 | 19 | 11 | 1 | 29 | 18 | 12 | 0 | 1293.15533 | -0.00101 | .00400 | -0.00084 | 0.16 |
| 1559: | 37 | 15 | 23 | 1 | 36 | 14 | 23 | 0 | 1293.15533 | -0.00064 | .00400 | -0.00084 | 0.09 |
| 1560: | 30 | 19 | 12 | 1 | 29 | 18 | 12 | 0 | 1293.15533 | -0.00101 | .00400 | -0.00084 | 0.11 |
| 1561: | 30 | 19 | 12 | 1 | 29 | 18 | 11 | 0 | 1293.15533 | -0.00101 | .00400 | -0.00084 | 0.16 |
| 1562: | 31 | 19 | 12 | 1 | 30 | 18 | 13 | 0 | 1293.58473 | -0.00263 | .00400 | -0.00186 | 0.16 |
| 1563: | 38 | 15 | 23 | 1 | 37 | 14 | 23 | 0 | 1293.58473 | -0.00096 | .00400 | -0.00186 | 0.09 |
| 1564: | 31 | 19 | 12 | 1 | 30 | 18 | 12 | 0 | 1293.58473 | -0.00263 | .00400 | -0.00186 | 0.11 |
| 1565: | 38 | 15 | 24 | 1 | 37 | 14 | 24 | 0 | 1293.58473 | -0.00096 | .00400 | -0.00186 | 0.09 |
| 1566: | 38 | 15 | 23 | 1 | 37 | 14 | 24 | 0 | 1293.58473 | -0.00096 | .00400 | -0.00186 | 0.14 |
| 1567: | 38 | 15 | 24 | 1 | 37 | 14 | 23 | 0 | 1293.58473 | -0.00096 | .00400 | -0.00186 | 0.14 |
| 1568: | 31 | 19 | 13 | 1 | 30 | 18 | 13 | 0 | 1293.58473 | -0.00263 | .00400 | -0.00186 | 0.11 |
| 1569: | 31 | 19 | 13 | 1 | 30 | 18 | 12 | 0 | 1293.58473 | -0.00263 | .00400 | -0.00186 | 0.16 |
| 1570: | 39 | 15 | 25 | 1 | 38 | 14 | 24 | 0 | 1294.01628 | 0.00104  | .00400 | -0.00075 | 0.14 |
| 1571: | 39 | 15 | 25 | 1 | 38 | 14 | 25 | 0 | 1294.01628 | 0.00104  | .00400 | -0.00075 | 0.09 |
| 1572: | 39 | 15 | 24 | 1 | 38 | 14 | 24 | 0 | 1294.01628 | 0.00104  | .00400 | -0.00075 | 0.09 |
| 1573: | 32 | 19 | 14 | 1 | 31 | 18 | 14 | 0 | 1294.01628 | -0.00228 | .00400 | -0.00075 | 0.11 |
| 1574: | 32 | 19 | 13 | 1 | 31 | 18 | 14 | 0 | 1294.01628 | -0.00228 | .00400 | -0.00075 | 0.16 |
| 1575: | 32 | 19 | 13 | 1 | 31 | 18 | 13 | 0 | 1294.01628 | -0.00228 | .00400 | -0.00075 | 0.11 |
| 1576: | 39 | 15 | 24 | 1 | 38 | 14 | 25 | 0 | 1294.01628 | 0.00104  | .00400 | -0.00075 | 0.14 |
| 1577: | 32 | 19 | 14 | 1 | 31 | 18 | 13 | 0 | 1294.01628 | -0.00228 | .00400 | -0.00075 | 0.16 |
| 1578: | 38 | 20 | 18 | 1 | 37 | 19 | 19 | 0 | 1297.35619 | -0.00014 | .00400 | -0.00048 | 0.15 |
| 1579: | 45 | 16 | 30 | 1 | 44 | 15 | 29 | 0 | 1297.35619 | -0.00082 | .00400 | -0.00048 | 0.12 |
| 1580: | 45 | 16 | 29 | 1 | 44 | 15 | 30 | 0 | 1297.35619 | -0.00082 | .00400 | -0.00048 | 0.12 |
| 1581: | 45 | 16 | 30 | 1 | 44 | 15 | 30 | 0 | 1297.35619 | -0.00082 | .00400 | -0.00048 | 0.12 |
| 1582: | 45 | 16 | 29 | 1 | 44 | 15 | 29 | 0 | 1297.35619 | -0.00082 | .00400 | -0.00048 | 0.12 |
| 1583: | 38 | 20 | 18 | 1 | 37 | 19 | 18 | 0 | 1297.35619 | -0.00014 | .00400 | -0.00048 | 0.10 |
| 1584: | 38 | 20 | 19 | 1 | 37 | 19 | 19 | 0 | 1297.35619 | -0.00014 | .00400 | -0.00048 | 0.10 |
| 1585: | 38 | 20 | 19 | 1 | 37 | 19 | 18 | 0 | 1297.35619 | -0.00014 | .00400 | -0.00048 | 0.15 |
| 1586: | 46 | 16 | 30 | 1 | 45 | 15 | 31 | 0 | 1297.78790 | 0.00176  | .00400 | 0.00048  | 0.12 |
| 1587: | 46 | 16 | 31 | 1 | 45 | 15 | 30 | 0 | 1297.78790 | 0.00176  | .00400 | 0.00048  | 0.12 |
| 1588: | 46 | 16 | 30 | 1 | 45 | 15 | 30 | 0 | 1297.78790 | 0.00176  | .00400 | 0.00048  | 0.12 |
| 1589: | 46 | 16 | 31 | 1 | 45 | 15 | 31 | 0 | 1297.78790 | 0.00176  | .00400 | 0.00048  | 0.12 |
| 1590: | 39 | 20 | 19 | 1 | 38 | 19 | 19 | 0 | 1297.78790 | -0.00077 | .00400 | 0.00048  | 0.10 |
| 1591: | 39 | 20 | 20 | 1 | 38 | 19 | 19 | 0 | 1297.78790 | -0.00077 | .00400 | 0.00048  | 0.15 |
| 1592: | 39 | 20 | 19 | 1 | 38 | 19 | 20 | 0 | 1297.78790 | -0.00077 | .00400 | 0.00048  | 0.15 |
| 1593: | 39 | 20 | 20 | 1 | 38 | 19 | 20 | 0 | 1297.78790 | -0.00077 | .00400 | 0.00048  | 0.10 |
| 1594: | 19 | 8  | 12 | 1 | 18 | 7  | 11 | 0 | 1280.07930 | 0.00212  | .01000 | -0.00064 | 0.12 |
| 1595: | 19 | 8  | 11 | 1 | 18 | 7  | 11 | 0 | 1280.07930 | 0.00212  | .01000 | -0.00064 | 0.08 |
| 1596: | 19 | 8  | 12 | 1 | 18 | 7  | 12 | 0 | 1280.07930 | 0.00209  | .01000 | -0.00064 | 0.08 |
| 1597: | 19 | 8  | 11 | 1 | 18 | 7  | 12 | 0 | 1280.07930 | 0.00209  | .01000 | -0.00064 | 0.12 |
| 1598: | 23 | 6  | 18 | 1 | 22 | 5  | 17 | 0 | 1280.07930 | -0.00024 | .01000 | -0.00064 | 0.11 |
| 1599: | 34 | 0  | 34 | 1 | 33 | 1  | 33 | 0 | 1280.07930 | -0.00308 | .01000 | -0.00064 | 0.16 |
| 1600: | 34 | 1  | 34 | 1 | 33 | 1  | 33 | 0 | 1280.07930 | -0.00308 | .01000 | -0.00064 | 0.08 |
| 1601: | 34 | 0  | 34 | 1 | 33 | 0  | 33 | 0 | 1280.07930 | -0.00308 | .01000 | -0.00064 | 0.08 |
| 1602: | 34 | 1  | 34 | 1 | 33 | 0  | 33 | 0 | 1280.07930 | -0.00309 | .01000 | -0.00064 | 0.16 |
| 1603: | 37 | 5  | 32 | 1 | 36 | 6  | 31 | 0 | 1280.90746 | -0.00142 | .00400 | -0.00211 | 0.15 |
| 1604: | 36 | 0  | 36 | 1 | 35 | 1  | 35 | 0 | 1280.90746 | -0.00224 | .00400 | -0.00211 | 0.29 |
| 1605: | 36 | 1  | 36 | 1 | 35 | 1  | 35 | 0 | 1280.90746 | -0.00224 | .00400 | -0.00211 | 0.14 |
| 1606: | 36 | 0  | 36 | 1 | 35 | 0  | 35 | 0 | 1280.90746 | -0.00224 | .00400 | -0.00211 | 0.14 |
| 1607: | 36 | 1  | 36 | 1 | 35 | 0  | 35 | 0 | 1280.90746 | -0.00224 | .00400 | -0.00211 | 0.29 |
| 1608: | 37 | 0  | 37 | 1 | 36 | 1  | 36 | 0 | 1281.32362 | -0.00036 | .00400 | -0.00208 | 0.26 |
| 1609: | 37 | 1  | 37 | 1 | 36 | 1  | 36 | 0 | 1281.32362 | -0.00036 | .00400 | -0.00208 | 0.12 |
| 1610: | 37 | 0  | 37 | 1 | 36 | 0  | 36 | 0 | 1281.32362 | -0.00036 | .00400 | -0.00208 | 0.12 |
| 1611: | 37 | 1  | 37 | 1 | 36 | 0  | 36 | 0 | 1281.32362 | -0.00036 | .00400 | -0.00208 | 0.26 |
| 1612: | 38 | 20 | 18 | 1 | 38 | 19 | 19 | 0 | 1281.32362 | -0.00746 | .00400 | -0.00208 | 0.12 |
| 1613: | 38 | 20 | 19 | 1 | 38 | 19 | 20 | 0 | 1281.32362 | -0.00746 | .00400 | -0.00208 | 0.12 |
| 1614: | 14 | 11 | 3  | 1 | 13 | 10 | 3  | 0 | 1280.24414 | -0.00442 | .00400 | -0.00637 | 0.10 |
| 1615: | 14 | 11 | 3  | 1 | 13 | 10 | 4  | 0 | 1280.24414 | -0.00442 | .00400 | -0.00637 | 0.15 |
| 1616: | 14 | 11 | 4  | 1 | 13 | 10 | 3  | 0 | 1280.24414 | -0.00442 | .00400 | -0.00637 | 0.15 |
| 1617: | 14 | 11 | 4  | 1 | 13 | 10 | 4  | 0 | 1280.24414 | -0.00442 | .00400 | -0.00637 | 0.10 |
| 1618: | 34 | 1  | 33 | 1 | 33 | 2  | 32 | 0 | 1280.24414 | -0.00812 | .00400 | -0.00637 | 0.17 |
| 1619: | 34 | 2  | 33 | 1 | 33 | 2  | 32 | 0 | 1280.24414 | -0.00828 | .00400 | -0.00637 | 0.08 |
| 1620: | 34 | 1  | 33 | 1 | 33 | 1  | 32 | 0 | 1280.24414 | -0.00836 | .00400 | -0.00637 | 0.08 |
| 1621: | 34 | 2  | 33 | 1 | 33 | 1  | 32 | 0 | 1280.24414 | -0.00852 | .00400 | -0.00637 | 0.17 |
| 1622: | 47 | 19 | 28 | 1 | 47 | 18 | 29 | 0 | 1280.65764 | -0.00731 | .00400 | -0.00734 | 0.11 |
| 1623: | 47 | 19 | 29 | 1 | 47 | 18 | 30 | 0 | 1280.65764 | -0.00731 | .00400 | -0.00734 | 0.11 |
| 1624: | 35 | 1  | 34 | 1 | 34 | 2  | 33 | 0 | 1280.65764 | -0.00721 | .00400 | -0.00734 | 0.26 |
| 1625: | 35 | 2  | 34 | 1 | 34 | 2  | 33 | 0 | 1280.65764 | -0.00732 | .00400 | -0.00734 | 0.13 |
| 1626: | 35 | 1  | 34 | 1 | 34 | 1  | 33 | 0 | 1280.65764 | -0.00737 | .00400 | -0.00734 | 0.13 |
| 1627: | 35 | 2  | 34 | 1 | 34 | 1  | 33 | 0 | 1280.65764 | -0.00748 | .00400 | -0.00734 | 0.26 |
| 1628: | 37 | 15 | 23 | 1 | 36 | 15 | 22 | 0 | 1281.90389 | -0.00054 | .00400 | -0.00175 | 0.10 |
| 1629: | 38 | 1  | 37 | 1 | 37 | 2  | 36 | 0 | 1281.90389 | -0.00118 | .00400 | -0.00175 | 0.26 |
| 1630: | 38 | 2  | 37 | 1 | 37 | 2  | 36 | 0 | 1281.90389 | -0.00121 | .00400 | -0.00175 | 0.13 |
| 1631: | 38 | 1  | 37 | 1 | 37 | 1  | 36 | 0 | 1281.90389 | -0.00122 | .00400 | -0.00175 | 0.13 |

|       |    |   |    |   |    |    |    |   |            |          |        |          |      |
|-------|----|---|----|---|----|----|----|---|------------|----------|--------|----------|------|
| 1632: | 38 | 2 | 37 | 1 | 37 | 1  | 36 | 0 | 1281.90389 | -0.00125 | .00400 | -0.00175 | 0.26 |
| 1633: | 36 | 5 | 31 | 1 | 35 | 5  | 30 | 0 | 1281.90389 | -0.00592 | .00400 | -0.00175 | 0.13 |
| 1634: | 39 | 1 | 38 | 1 | 38 | 2  | 37 | 0 | 1282.31809 | -0.00120 | .00400 | -0.00176 | 0.29 |
| 1635: | 39 | 2 | 38 | 1 | 38 | 2  | 37 | 0 | 1282.31809 | -0.00122 | .00400 | -0.00176 | 0.14 |
| 1636: | 39 | 1 | 38 | 1 | 38 | 1  | 37 | 0 | 1282.31809 | -0.00123 | .00400 | -0.00176 | 0.14 |
| 1637: | 39 | 2 | 38 | 1 | 38 | 1  | 37 | 0 | 1282.31809 | -0.00125 | .00400 | -0.00176 | 0.29 |
| 1638: | 37 | 5 | 32 | 1 | 36 | 5  | 31 | 0 | 1282.31809 | -0.00501 | .00400 | -0.00176 | 0.14 |
| 1639: | 16 | 6 | 11 | 1 | 15 | 5  | 10 | 0 | 1277.24153 | -0.00355 | .00400 | -0.00522 | 0.26 |
| 1640: | 16 | 6 | 10 | 1 | 15 | 5  | 10 | 0 | 1277.24153 | -0.00377 | .00400 | -0.00522 | 0.18 |
| 1641: | 42 | 9 | 34 | 1 | 41 | 10 | 31 | 0 | 1277.24153 | -0.00513 | .00400 | -0.00522 | 0.12 |
| 1642: | 16 | 6 | 11 | 1 | 15 | 5  | 11 | 0 | 1277.24153 | -0.00669 | .00400 | -0.00522 | 0.18 |
| 1643: | 16 | 6 | 10 | 1 | 15 | 5  | 11 | 0 | 1277.24153 | -0.00692 | .00400 | -0.00522 | 0.26 |
| 1644: | 1  | 1 | 0  | 1 | 1  | 0  | 1  | 0 | 1266.60196 | -0.00174 | .00100 | *        |      |
| 1645: | 3  | 1 | 2  | 1 | 3  | 0  | 3  | 0 | 1266.66946 | -0.00154 | .00100 | *        |      |
| 1646: | 4  | 1 | 3  | 1 | 4  | 0  | 4  | 0 | 1266.72850 | -0.00126 | .00100 | *        |      |
| 1647: | 5  | 1 | 4  | 1 | 5  | 0  | 5  | 0 | 1266.80843 | -0.00047 | .00100 | *        |      |
| 1648: | 9  | 1 | 9  | 1 | 9  | 0  | 9  | 0 | 1266.30878 | -0.00016 | .00100 | *        |      |
| 1649: | 5  | 1 | 5  | 1 | 4  | 0  | 4  | 0 | 1268.52982 | -0.00177 | .00100 | *        |      |
| 1650: | 7  | 1 | 7  | 1 | 6  | 0  | 6  | 0 | 1269.26019 | -0.00002 | .00100 | *        |      |
| 1651: | 11 | 1 | 11 | 1 | 10 | 0  | 10 | 0 | 1270.75320 | 0.00026  | .00100 | *        |      |
| 1652: | 15 | 1 | 15 | 1 | 14 | 0  | 14 | 0 | 1272.32574 | 0.00089  | .00100 | *        |      |
| 1653: | 10 | 0 | 10 | 1 | 9  | 0  | 9  | 0 | 1270.30751 | -0.00015 | .00100 | *        |      |
| 1654: | 1  | 0 | 1  | 1 | 1  | 1  | 0  | 0 | 1265.79890 | -0.00020 | .00100 | *        |      |
| 1655: | 2  | 0 | 2  | 1 | 2  | 1  | 1  | 0 | 1265.77477 | 0.00045  | .00100 | *        |      |
| 1656: | 3  | 0 | 3  | 1 | 3  | 1  | 2  | 0 | 1265.73502 | -0.00007 | .00100 | *        |      |
| 1657: | 4  | 0 | 4  | 1 | 4  | 1  | 3  | 0 | 1265.67916 | 0.00011  | .00100 | *        |      |
| 1658: | 5  | 0 | 5  | 1 | 5  | 1  | 4  | 0 | 1265.60306 | -0.00039 | .00100 | *        |      |
| 1659: | 8  | 0 | 8  | 1 | 8  | 1  | 7  | 0 | 1265.23747 | 0.00072  | .00100 | *        |      |
| 1660: | 9  | 0 | 9  | 1 | 9  | 1  | 8  | 0 | 1265.06701 | 0.00045  | .00100 | *        |      |
| 1661: | 14 | 0 | 14 | 1 | 14 | 1  | 14 | 0 | 1266.23855 | 0.00283  | .00100 | *        |      |
| 1662: | 15 | 0 | 15 | 1 | 15 | 1  | 15 | 0 | 1266.24952 | 0.00151  | .00100 | *        |      |
| 1663: | 9  | 0 | 9  | 1 | 8  | 1  | 8  | 0 | 1269.79122 | 0.00081  | .00100 | *        |      |
| 1664: | 10 | 0 | 10 | 1 | 9  | 1  | 9  | 0 | 1270.22024 | -0.00002 | .00100 | *        |      |
| 1665: | 15 | 0 | 15 | 1 | 14 | 1  | 14 | 0 | 1272.30131 | 0.00158  | .00100 | *        |      |
| 1666: | 6  | 1 | 6  | 1 | 5  | 1  | 5  | 0 | 1268.65631 | -0.00097 | .00100 | *        |      |
| 1667: | 7  | 1 | 6  | 1 | 6  | 1  | 5  | 0 | 1269.22658 | -0.00035 | .00100 | *        |      |
| 1668: | 10 | 1 | 10 | 1 | 9  | 1  | 9  | 0 | 1270.28370 | -0.00041 | .00100 | *        |      |
| 1669: | 10 | 2 | 9  | 1 | 10 | 1  | 9  | 0 | 1266.80348 | 0.00080  | .00100 | *        |      |
| 1670: | 11 | 2 | 10 | 1 | 11 | 1  | 10 | 0 | 1266.71692 | 0.00082  | .00100 | *        |      |
| 1671: | 10 | 2 | 9  | 1 | 10 | 1  | 10 | 0 | 1268.08911 | -0.00008 | .00100 | *        |      |
| 1672: | 11 | 2 | 10 | 1 | 11 | 1  | 11 | 0 | 1268.23303 | 0.00022  | .00100 | *        |      |
| 1673: | 9  | 2 | 8  | 1 | 8  | 1  | 7  | 0 | 1270.75160 | -0.00032 | .00100 | *        |      |
| 1674: | 12 | 2 | 11 | 1 | 11 | 1  | 10 | 0 | 1271.72919 | 0.00122  | .00100 | *        |      |
| 1675: | 3  | 2 | 1  | 1 | 2  | 1  | 2  | 0 | 1268.67686 | -0.00183 | .00100 | *        |      |
| 1676: | 10 | 2 | 8  | 1 | 10 | 1  | 9  | 0 | 1267.24786 | 0.00116  | .00100 | *        |      |
| 1677: | 4  | 1 | 3  | 1 | 4  | 2  | 2  | 0 | 1265.13356 | -0.00121 | .00100 | *        |      |
| 1678: | 5  | 1 | 4  | 1 | 5  | 2  | 3  | 0 | 1265.17172 | -0.00056 | .00100 | *        |      |
| 1679: | 6  | 1 | 5  | 1 | 6  | 2  | 4  | 0 | 1265.20459 | -0.00028 | .00100 | *        |      |
| 1680: | 7  | 1 | 6  | 1 | 7  | 2  | 5  | 0 | 1265.22764 | 0.00049  | .00100 | *        |      |
| 1681: | 8  | 1 | 7  | 1 | 8  | 2  | 6  | 0 | 1265.23477 | 0.00058  | .00100 | *        |      |
| 1682: | 9  | 1 | 8  | 1 | 9  | 2  | 7  | 0 | 1265.22233 | 0.00056  | .00100 | *        |      |
| 1683: | 10 | 1 | 9  | 1 | 10 | 2  | 8  | 0 | 1265.18751 | 0.00109  | .00100 | *        |      |
| 1684: | 11 | 1 | 10 | 1 | 11 | 2  | 9  | 0 | 1265.12656 | 0.00120  | .00100 | *        |      |
| 1685: | 15 | 1 | 14 | 1 | 15 | 2  | 13 | 0 | 1264.59619 | -0.00072 | .00100 | *        |      |
| 1686: | 5  | 1 | 4  | 1 | 5  | 2  | 4  | 0 | 1265.21061 | -0.00069 | .00100 | *        |      |
| 1687: | 9  | 1 | 8  | 1 | 9  | 2  | 8  | 0 | 1265.54123 | 0.00155  | .00100 | *        |      |
| 1688: | 10 | 1 | 9  | 1 | 10 | 2  | 9  | 0 | 1265.63601 | 0.00108  | .00100 | *        |      |
| 1689: | 9  | 1 | 8  | 1 | 8  | 2  | 7  | 0 | 1269.31241 | 0.00060  | .00100 | *        |      |
| 1690: | 10 | 1 | 9  | 1 | 9  | 2  | 8  | 0 | 1269.82092 | 0.00055  | .00100 | *        |      |
| 1691: | 12 | 1 | 11 | 1 | 11 | 2  | 10 | 0 | 1270.83040 | 0.00177  | .00100 | *        |      |
| 1692: | 13 | 1 | 12 | 1 | 12 | 2  | 11 | 0 | 1271.32364 | 0.00164  | .00100 | *        |      |
| 1693: | 7  | 2 | 5  | 1 | 6  | 2  | 4  | 0 | 1269.20421 | -0.00110 | .00100 | *        |      |
| 1694: | 4  | 3 | 1  | 1 | 4  | 2  | 2  | 0 | 1268.13739 | -0.00081 | .00100 | *        |      |
| 1695: | 7  | 3 | 5  | 1 | 7  | 2  | 6  | 0 | 1268.19463 | 0.00045  | .00100 | *        |      |
| 1696: | 9  | 3 | 7  | 1 | 9  | 2  | 8  | 0 | 1268.25581 | -0.00028 | .00100 | *        |      |
| 1697: | 5  | 3 | 2  | 1 | 5  | 2  | 3  | 0 | 1268.12394 | -0.00075 | .00100 | *        |      |
| 1698: | 8  | 3 | 5  | 1 | 7  | 2  | 6  | 0 | 1271.59274 | 0.00010  | .00100 | *        |      |
| 1699: | 11 | 2 | 9  | 1 | 11 | 3  | 9  | 0 | 1264.68257 | 0.00093  | .00100 | *        |      |
| 1700: | 12 | 2 | 10 | 1 | 12 | 3  | 9  | 0 | 1264.65345 | 0.00057  | .00100 | *        |      |
| 1701: | 13 | 2 | 11 | 1 | 13 | 3  | 10 | 0 | 1264.70492 | 0.00052  | .00100 | *        |      |
| 1702: | 13 | 3 | 10 | 1 | 12 | 4  | 9  | 0 | 1269.20970 | -0.00066 | .00100 | *        |      |
| 1703: | 11 | 4 | 7  | 1 | 10 | 3  | 8  | 0 | 1273.59437 | -0.00022 | .00100 | *        |      |
| 1704: | 5  | 3 | 3  | 1 | 4  | 2  | 2  | 0 | 1270.25026 | -0.00006 | .00100 | -0.00043 | 0.60 |
| 1705: | 5  | 3 | 2  | 1 | 4  | 2  | 2  | 0 | 1270.25026 | -0.00097 | .00100 | -0.00043 | 0.40 |
| 1706: | 5  | 3 | 3  | 1 | 4  | 2  | 3  | 0 | 1270.26753 | 0.00027  | .00100 | -0.00027 | 0.40 |
| 1707: | 5  | 3 | 2  | 1 | 4  | 2  | 3  | 0 | 1270.26753 | -0.00064 | .00100 | -0.00027 | 0.60 |
| 1708: | 4  | 4 | 1  | 1 | 3  | 3  | 0  | 0 | 1270.61263 | -0.00028 | .00100 | -0.00030 | 0.30 |
| 1709: | 4  | 4 | 0  | 1 | 3  | 3  | 0  | 0 | 1270.61263 | -0.00028 | .00100 | -0.00030 | 0.20 |

|       |    |   |    |   |    |   |    |   |            |          |        |          |      |
|-------|----|---|----|---|----|---|----|---|------------|----------|--------|----------|------|
| 1710: | 4  | 4 | 1  | 1 | 3  | 3 | 1  | 0 | 1270.61263 | -0.00031 | .00100 | -0.00030 | 0.20 |
| 1711: | 4  | 4 | 0  | 1 | 3  | 3 | 1  | 0 | 1270.61263 | -0.00031 | .00100 | -0.00030 | 0.30 |
| 1712: | 5  | 4 | 2  | 1 | 4  | 3 | 1  | 0 | 1271.03727 | 0.00105  | .00100 | 0.00093  | 0.30 |
| 1713: | 5  | 4 | 2  | 1 | 4  | 3 | 2  | 0 | 1271.03727 | 0.00082  | .00100 | 0.00093  | 0.20 |
| 1714: | 5  | 4 | 1  | 1 | 4  | 3 | 2  | 0 | 1271.03727 | 0.00081  | .00100 | 0.00093  | 0.30 |
| 1715: | 5  | 4 | 1  | 1 | 4  | 3 | 1  | 0 | 1271.03727 | 0.00104  | .00100 | 0.00093  | 0.20 |
| 1716: | 5  | 5 | 1  | 1 | 4  | 4 | 0  | 0 | 1271.81087 | 0.00027  | .00100 | 0.00027  | 0.30 |
| 1717: | 5  | 5 | 0  | 1 | 4  | 4 | 0  | 0 | 1271.81087 | 0.00027  | .00100 | 0.00027  | 0.20 |
| 1718: | 5  | 5 | 1  | 1 | 4  | 4 | 1  | 0 | 1271.81087 | 0.00027  | .00100 | 0.00027  | 0.20 |
| 1719: | 5  | 5 | 0  | 1 | 4  | 4 | 1  | 0 | 1271.81087 | 0.00027  | .00100 | 0.00027  | 0.30 |
| 1720: | 6  | 5 | 2  | 1 | 5  | 4 | 1  | 0 | 1272.23402 | -0.00039 | .00100 | -0.00040 | 0.30 |
| 1721: | 6  | 5 | 1  | 1 | 5  | 4 | 1  | 0 | 1272.23402 | -0.00039 | .00100 | -0.00040 | 0.20 |
| 1722: | 6  | 5 | 2  | 1 | 5  | 4 | 2  | 0 | 1272.23402 | -0.00040 | .00100 | -0.00040 | 0.20 |
| 1723: | 6  | 5 | 1  | 1 | 5  | 4 | 2  | 0 | 1272.23402 | -0.00040 | .00100 | -0.00040 | 0.30 |
| 1724: | 7  | 5 | 3  | 1 | 6  | 4 | 2  | 0 | 1272.65771 | -0.00069 | .00100 | -0.00071 | 0.30 |
| 1725: | 7  | 5 | 2  | 1 | 6  | 4 | 2  | 0 | 1272.65771 | -0.00069 | .00100 | -0.00071 | 0.20 |
| 1726: | 7  | 5 | 3  | 1 | 6  | 4 | 3  | 0 | 1272.65771 | -0.00073 | .00100 | -0.00071 | 0.20 |
| 1727: | 7  | 5 | 2  | 1 | 6  | 4 | 3  | 0 | 1272.65771 | -0.00073 | .00100 | -0.00071 | 0.30 |
| 1728: | 8  | 5 | 4  | 1 | 7  | 4 | 3  | 0 | 1273.08167 | -0.00074 | .00100 | -0.00081 | 0.30 |
| 1729: | 8  | 5 | 3  | 1 | 7  | 4 | 3  | 0 | 1273.08167 | -0.00074 | .00100 | -0.00081 | 0.20 |
| 1730: | 8  | 5 | 4  | 1 | 7  | 4 | 4  | 0 | 1273.08167 | -0.00087 | .00100 | -0.00081 | 0.20 |
| 1731: | 8  | 5 | 3  | 1 | 7  | 4 | 4  | 0 | 1273.08167 | -0.00088 | .00100 | -0.00081 | 0.30 |
| 1732: | 8  | 6 | 3  | 1 | 7  | 5 | 2  | 0 | 1273.85551 | -0.00017 | .00100 | -0.00017 | 0.30 |
| 1733: | 8  | 6 | 2  | 1 | 7  | 5 | 2  | 0 | 1273.85551 | -0.00017 | .00100 | -0.00017 | 0.20 |
| 1734: | 8  | 6 | 3  | 1 | 7  | 5 | 3  | 0 | 1273.85551 | -0.00017 | .00100 | -0.00017 | 0.20 |
| 1735: | 8  | 6 | 2  | 1 | 7  | 5 | 3  | 0 | 1273.85551 | -0.00017 | .00100 | -0.00017 | 0.30 |
| 1736: | 9  | 6 | 4  | 1 | 8  | 5 | 3  | 0 | 1274.28039 | 0.00012  | .00100 | 0.00012  | 0.30 |
| 1737: | 9  | 6 | 3  | 1 | 8  | 5 | 3  | 0 | 1274.28039 | 0.00012  | .00100 | 0.00012  | 0.20 |
| 1738: | 9  | 6 | 4  | 1 | 8  | 5 | 4  | 0 | 1274.28039 | 0.00011  | .00100 | 0.00012  | 0.20 |
| 1739: | 9  | 6 | 3  | 1 | 8  | 5 | 4  | 0 | 1274.28039 | 0.00011  | .00100 | 0.00012  | 0.30 |
| 1740: | 10 | 6 | 5  | 1 | 9  | 5 | 4  | 0 | 1274.70421 | -0.00071 | .00100 | -0.00072 | 0.50 |
| 1741: | 10 | 6 | 4  | 1 | 9  | 5 | 5  | 0 | 1274.70421 | -0.00073 | .00100 | -0.00072 | 0.50 |
| 1742: | 12 | 6 | 7  | 1 | 11 | 5 | 6  | 0 | 1275.55254 | -0.00138 | .00100 | -0.00146 | 0.50 |
| 1743: | 12 | 6 | 6  | 1 | 11 | 5 | 7  | 0 | 1275.55254 | -0.00153 | .00100 | -0.00146 | 0.50 |
| 1744: | 13 | 6 | 8  | 1 | 12 | 5 | 7  | 0 | 1275.97771 | -0.00023 | .00100 | -0.00041 | 0.50 |
| 1745: | 13 | 6 | 7  | 1 | 12 | 5 | 8  | 0 | 1275.97771 | -0.00059 | .00100 | -0.00041 | 0.50 |
| 1746: | 14 | 6 | 9  | 1 | 13 | 5 | 8  | 0 | 1276.39988 | -0.00148 | .00100 | -0.00188 | 0.50 |
| 1747: | 14 | 6 | 8  | 1 | 13 | 5 | 9  | 0 | 1276.39988 | -0.00228 | .00100 | -0.00188 | 0.50 |
| 1748: | 7  | 7 | 0  | 1 | 6  | 6 | 0  | 0 | 1274.20271 | 0.00039  | .00100 | 0.00039  | 0.20 |
| 1749: | 7  | 7 | 1  | 1 | 6  | 6 | 0  | 0 | 1274.20271 | 0.00039  | .00100 | 0.00039  | 0.30 |
| 1750: | 7  | 7 | 0  | 1 | 6  | 6 | 1  | 0 | 1274.20271 | 0.00039  | .00100 | 0.00039  | 0.30 |
| 1751: | 7  | 7 | 1  | 1 | 6  | 6 | 1  | 0 | 1274.20271 | 0.00039  | .00100 | 0.00039  | 0.20 |
| 1752: | 8  | 7 | 1  | 1 | 7  | 6 | 1  | 0 | 1274.62726 | 0.00040  | .00100 | 0.00041  | 0.20 |
| 1753: | 8  | 7 | 2  | 1 | 7  | 6 | 1  | 0 | 1274.62726 | 0.00040  | .00100 | 0.00041  | 0.30 |
| 1754: | 8  | 7 | 1  | 1 | 7  | 6 | 2  | 0 | 1274.62726 | 0.00040  | .00100 | 0.00041  | 0.30 |
| 1755: | 8  | 7 | 2  | 1 | 7  | 6 | 2  | 0 | 1274.62726 | 0.00040  | .00100 | 0.00041  | 0.20 |
| 1756: | 10 | 7 | 4  | 1 | 9  | 6 | 3  | 0 | 1275.47601 | -0.00066 | .00100 | -0.00067 | 0.50 |
| 1757: | 10 | 7 | 3  | 1 | 9  | 6 | 4  | 0 | 1275.47601 | -0.00067 | .00100 | -0.00067 | 0.50 |
| 1758: | 11 | 7 | 5  | 1 | 10 | 6 | 4  | 0 | 1275.90165 | -0.00020 | .00100 | -0.00020 | 0.50 |
| 1759: | 11 | 7 | 4  | 1 | 10 | 6 | 5  | 0 | 1275.90165 | -0.00020 | .00100 | -0.00020 | 0.50 |
| 1760: | 12 | 7 | 6  | 1 | 11 | 6 | 5  | 0 | 1276.32623 | -0.00088 | .00100 | -0.00088 | 0.50 |
| 1761: | 12 | 7 | 5  | 1 | 11 | 6 | 6  | 0 | 1276.32623 | -0.00088 | .00100 | -0.00088 | 0.50 |
| 1762: | 13 | 7 | 7  | 1 | 12 | 6 | 6  | 0 | 1276.75223 | -0.00013 | .00100 | -0.00014 | 0.50 |
| 1763: | 13 | 7 | 6  | 1 | 12 | 6 | 7  | 0 | 1276.75223 | -0.00014 | .00100 | -0.00014 | 0.50 |
| 1764: | 14 | 7 | 8  | 1 | 13 | 6 | 7  | 0 | 1277.17714 | -0.00039 | .00100 | -0.00040 | 0.50 |
| 1765: | 14 | 7 | 7  | 1 | 13 | 6 | 8  | 0 | 1277.17714 | -0.00041 | .00100 | -0.00040 | 0.50 |
| 1766: | 15 | 7 | 9  | 1 | 14 | 6 | 8  | 0 | 1277.60212 | -0.00037 | .00100 | -0.00040 | 0.50 |
| 1767: | 15 | 7 | 8  | 1 | 14 | 6 | 9  | 0 | 1277.60212 | -0.00042 | .00100 | -0.00040 | 0.50 |
| 1768: | 16 | 7 | 10 | 1 | 15 | 6 | 9  | 0 | 1278.02605 | -0.00108 | .00100 | -0.00114 | 0.50 |
| 1769: | 16 | 7 | 9  | 1 | 15 | 6 | 10 | 0 | 1278.02605 | -0.00119 | .00100 | -0.00114 | 0.50 |
| 1770: | 19 | 7 | 13 | 1 | 18 | 6 | 12 | 0 | 1279.29633 | -0.00116 | .00100 | -0.00166 | 0.50 |
| 1771: | 19 | 7 | 12 | 1 | 18 | 6 | 13 | 0 | 1279.29633 | -0.00217 | .00100 | -0.00166 | 0.50 |
| 1772: | 9  | 8 | 1  | 1 | 8  | 7 | 2  | 0 | 1275.82097 | -0.00020 | .00100 | -0.00020 | 0.50 |
| 1773: | 9  | 8 | 2  | 1 | 8  | 7 | 1  | 0 | 1275.82097 | -0.00020 | .00100 | -0.00020 | 0.50 |
| 1774: | 10 | 8 | 2  | 1 | 9  | 7 | 3  | 0 | 1276.24647 | 0.00014  | .00100 | 0.00014  | 0.50 |
| 1775: | 10 | 8 | 3  | 1 | 9  | 7 | 2  | 0 | 1276.24647 | 0.00014  | .00100 | 0.00014  | 0.50 |
| 1776: | 11 | 8 | 3  | 1 | 10 | 7 | 3  | 0 | 1276.67170 | -0.00003 | .00100 | -0.00003 | 0.20 |
| 1777: | 11 | 8 | 4  | 1 | 10 | 7 | 3  | 0 | 1276.67170 | -0.00003 | .00100 | -0.00003 | 0.30 |
| 1778: | 11 | 8 | 3  | 1 | 10 | 7 | 4  | 0 | 1276.67170 | -0.00003 | .00100 | -0.00003 | 0.30 |
| 1779: | 11 | 8 | 4  | 1 | 10 | 7 | 4  | 0 | 1276.67170 | -0.00003 | .00100 | -0.00003 | 0.20 |
| 1780: | 12 | 8 | 4  | 1 | 11 | 7 | 4  | 0 | 1277.09751 | 0.00018  | .00100 | 0.00018  | 0.20 |
| 1781: | 12 | 8 | 5  | 1 | 11 | 7 | 4  | 0 | 1277.09751 | 0.00018  | .00100 | 0.00018  | 0.30 |
| 1782: | 12 | 8 | 4  | 1 | 11 | 7 | 5  | 0 | 1277.09751 | 0.00018  | .00100 | 0.00018  | 0.30 |
| 1783: | 12 | 8 | 5  | 1 | 11 | 7 | 5  | 0 | 1277.09751 | 0.00018  | .00100 | 0.00018  | 0.20 |
| 1784: | 13 | 8 | 6  | 1 | 12 | 7 | 5  | 0 | 1277.52337 | 0.00028  | .00100 | 0.00028  | 0.50 |
| 1785: | 13 | 8 | 5  | 1 | 12 | 7 | 6  | 0 | 1277.52337 | 0.00028  | .00100 | 0.00028  | 0.50 |
| 1786: | 14 | 8 | 7  | 1 | 13 | 7 | 6  | 0 | 1277.94865 | -0.00029 | .00100 | -0.00029 | 0.50 |
| 1787: | 14 | 8 | 6  | 1 | 13 | 7 | 7  | 0 | 1277.94865 | -0.00029 | .00100 | -0.00029 | 0.50 |

|       |    |    |    |   |    |    |    |   |            |          |        |          |      |
|-------|----|----|----|---|----|----|----|---|------------|----------|--------|----------|------|
| 1788: | 15 | 8  | 8  | 1 | 14 | 7  | 7  | 0 | 1278.37476 | -0.00006 | .00100 | -0.00006 | 0.50 |
| 1789: | 15 | 8  | 7  | 1 | 14 | 7  | 8  | 0 | 1278.37476 | -0.00006 | .00100 | -0.00006 | 0.50 |
| 1790: | 16 | 8  | 9  | 1 | 15 | 7  | 8  | 0 | 1278.79992 | -0.00075 | .00100 | -0.00075 | 0.50 |
| 1791: | 16 | 8  | 8  | 1 | 15 | 7  | 9  | 0 | 1278.79992 | -0.00075 | .00100 | -0.00075 | 0.50 |
| 1792: | 17 | 8  | 10 | 1 | 16 | 7  | 9  | 0 | 1279.22587 | -0.00053 | .00100 | -0.00054 | 0.50 |
| 1793: | 17 | 8  | 9  | 1 | 16 | 7  | 10 | 0 | 1279.22587 | -0.00054 | .00100 | -0.00054 | 0.50 |
| 1794: | 18 | 8  | 11 | 1 | 17 | 7  | 10 | 0 | 1279.65218 | 0.00024  | .00100 | 0.00023  | 0.50 |
| 1795: | 18 | 8  | 10 | 1 | 17 | 7  | 11 | 0 | 1279.65218 | 0.00023  | .00100 | 0.00023  | 0.50 |
| 1796: | 9  | 9  | 0  | 1 | 8  | 8  | 0  | 0 | 1276.58916 | 0.00020  | .00100 | 0.00020  | 0.20 |
| 1797: | 9  | 9  | 0  | 1 | 8  | 8  | 1  | 0 | 1276.58916 | 0.00020  | .00100 | 0.00020  | 0.30 |
| 1798: | 9  | 9  | 1  | 1 | 8  | 8  | 0  | 0 | 1276.58916 | 0.00020  | .00100 | 0.00020  | 0.30 |
| 1799: | 9  | 9  | 1  | 1 | 8  | 8  | 1  | 0 | 1276.58916 | 0.00020  | .00100 | 0.00020  | 0.20 |
| 1800: | 10 | 9  | 1  | 1 | 9  | 8  | 1  | 0 | 1277.01440 | 0.00024  | .00100 | 0.00024  | 0.20 |
| 1801: | 10 | 9  | 1  | 1 | 9  | 8  | 2  | 0 | 1277.01440 | 0.00024  | .00100 | 0.00024  | 0.30 |
| 1802: | 10 | 9  | 2  | 1 | 9  | 8  | 1  | 0 | 1277.01440 | 0.00024  | .00100 | 0.00024  | 0.30 |
| 1803: | 10 | 9  | 2  | 1 | 9  | 8  | 2  | 0 | 1277.01440 | 0.00024  | .00100 | 0.00024  | 0.20 |
| 1804: | 11 | 9  | 2  | 1 | 10 | 8  | 2  | 0 | 1277.43987 | 0.00021  | .00100 | 0.00021  | 0.20 |
| 1805: | 11 | 9  | 2  | 1 | 10 | 8  | 3  | 0 | 1277.43987 | 0.00021  | .00100 | 0.00021  | 0.30 |
| 1806: | 11 | 9  | 3  | 1 | 10 | 8  | 2  | 0 | 1277.43987 | 0.00021  | .00100 | 0.00021  | 0.30 |
| 1807: | 11 | 9  | 3  | 1 | 10 | 8  | 3  | 0 | 1277.43987 | 0.00021  | .00100 | 0.00021  | 0.20 |
| 1808: | 12 | 9  | 3  | 1 | 11 | 8  | 4  | 0 | 1277.86532 | -0.00010 | .00100 | -0.00010 | 0.50 |
| 1809: | 12 | 9  | 4  | 1 | 11 | 8  | 3  | 0 | 1277.86532 | -0.00010 | .00100 | -0.00010 | 0.50 |
| 1810: | 13 | 9  | 4  | 1 | 12 | 8  | 5  | 0 | 1278.29106 | -0.00035 | .00100 | -0.00035 | 0.50 |
| 1811: | 13 | 9  | 5  | 1 | 12 | 8  | 4  | 0 | 1278.29106 | -0.00035 | .00100 | -0.00035 | 0.50 |
| 1812: | 14 | 9  | 6  | 1 | 13 | 8  | 5  | 0 | 1278.71726 | -0.00033 | .00100 | -0.00033 | 0.50 |
| 1813: | 14 | 9  | 5  | 1 | 13 | 8  | 6  | 0 | 1278.71726 | -0.00033 | .00100 | -0.00033 | 0.50 |
| 1814: | 16 | 9  | 8  | 1 | 15 | 8  | 7  | 0 | 1279.57087 | 0.00051  | .00100 | 0.00051  | 0.50 |
| 1815: | 16 | 9  | 7  | 1 | 15 | 8  | 8  | 0 | 1279.57087 | 0.00051  | .00100 | 0.00051  | 0.50 |
| 1816: | 17 | 9  | 9  | 1 | 16 | 8  | 8  | 0 | 1279.99743 | 0.00057  | .00100 | 0.00057  | 0.50 |
| 1817: | 17 | 9  | 8  | 1 | 16 | 8  | 9  | 0 | 1279.99743 | 0.00057  | .00100 | 0.00057  | 0.50 |
| 1818: | 10 | 10 | 0  | 1 | 9  | 9  | 0  | 0 | 1277.78086 | 0.00061  | .00100 | 0.00061  | 0.20 |
| 1819: | 10 | 10 | 0  | 1 | 9  | 9  | 1  | 0 | 1277.78086 | 0.00061  | .00100 | 0.00061  | 0.30 |
| 1820: | 10 | 10 | 1  | 1 | 9  | 9  | 0  | 0 | 1277.78086 | 0.00061  | .00100 | 0.00061  | 0.30 |
| 1821: | 10 | 10 | 1  | 1 | 9  | 9  | 1  | 0 | 1277.78086 | 0.00061  | .00100 | 0.00061  | 0.20 |
| 1822: | 11 | 10 | 1  | 1 | 10 | 9  | 2  | 0 | 1278.20601 | 0.00023  | .00100 | 0.00023  | 0.50 |
| 1823: | 11 | 10 | 2  | 1 | 10 | 9  | 1  | 0 | 1278.20601 | 0.00023  | .00100 | 0.00023  | 0.50 |
| 1824: | 12 | 10 | 2  | 1 | 11 | 9  | 3  | 0 | 1278.63154 | -0.00007 | .00100 | -0.00007 | 0.50 |
| 1825: | 12 | 10 | 3  | 1 | 11 | 9  | 2  | 0 | 1278.63154 | -0.00007 | .00100 | -0.00007 | 0.50 |
| 1826: | 13 | 10 | 3  | 1 | 12 | 9  | 4  | 0 | 1279.05809 | 0.00038  | .00100 | 0.00038  | 0.50 |
| 1827: | 13 | 10 | 4  | 1 | 12 | 9  | 3  | 0 | 1279.05809 | 0.00038  | .00100 | 0.00038  | 0.50 |
| 1828: | 14 | 10 | 4  | 1 | 13 | 9  | 5  | 0 | 1279.48436 | 0.00030  | .00100 | 0.00030  | 0.50 |
| 1829: | 14 | 10 | 5  | 1 | 13 | 9  | 4  | 0 | 1279.48436 | 0.00030  | .00100 | 0.00030  | 0.50 |
| 1830: | 15 | 10 | 5  | 1 | 14 | 9  | 6  | 0 | 1279.91047 | -0.00016 | .00100 | -0.00016 | 0.50 |
| 1831: | 15 | 10 | 6  | 1 | 14 | 9  | 5  | 0 | 1279.91047 | -0.00016 | .00100 | -0.00016 | 0.50 |
| 1832: | 16 | 10 | 6  | 1 | 15 | 9  | 7  | 0 | 1280.33705 | -0.00033 | .00100 | -0.00033 | 0.50 |
| 1833: | 16 | 10 | 7  | 1 | 15 | 9  | 6  | 0 | 1280.33705 | -0.00033 | .00100 | -0.00033 | 0.50 |
| 1834: | 17 | 10 | 7  | 1 | 16 | 9  | 8  | 0 | 1280.76452 | 0.00023  | .00100 | 0.00023  | 0.50 |
| 1835: | 17 | 10 | 8  | 1 | 16 | 9  | 7  | 0 | 1280.76452 | 0.00023  | .00100 | 0.00023  | 0.50 |
| 1836: | 11 | 11 | 0  | 1 | 10 | 10 | 1  | 0 | 1278.97052 | 0.00041  | .00100 | 0.00041  | 0.50 |
| 1837: | 11 | 11 | 1  | 1 | 10 | 10 | 0  | 0 | 1278.97052 | 0.00041  | .00100 | 0.00041  | 0.50 |
| 1838: | 12 | 11 | 1  | 1 | 11 | 10 | 2  | 0 | 1279.39631 | 0.00034  | .00100 | 0.00034  | 0.50 |
| 1839: | 12 | 11 | 2  | 1 | 11 | 10 | 1  | 0 | 1279.39631 | 0.00034  | .00100 | 0.00034  | 0.50 |
| 1840: | 13 | 11 | 2  | 1 | 12 | 10 | 3  | 0 | 1279.82253 | 0.00041  | .00100 | 0.00041  | 0.50 |
| 1841: | 13 | 11 | 3  | 1 | 12 | 10 | 2  | 0 | 1279.82253 | 0.00041  | .00100 | 0.00041  | 0.50 |
| 1842: | 14 | 11 | 3  | 1 | 13 | 10 | 4  | 0 | 1280.24799 | -0.00057 | .00100 | -0.00057 | 0.50 |
| 1843: | 14 | 11 | 4  | 1 | 13 | 10 | 3  | 0 | 1280.24799 | -0.00057 | .00100 | -0.00057 | 0.50 |
| 1844: | 15 | 11 | 4  | 1 | 14 | 10 | 5  | 0 | 1280.67629 | 0.00104  | .00100 | 0.00104  | 0.50 |
| 1845: | 15 | 11 | 5  | 1 | 14 | 10 | 4  | 0 | 1280.67629 | 0.00104  | .00100 | 0.00104  | 0.50 |
| 1846: | 16 | 11 | 5  | 1 | 15 | 10 | 6  | 0 | 1281.10277 | 0.00059  | .00100 | 0.00059  | 0.50 |
| 1847: | 16 | 11 | 6  | 1 | 15 | 10 | 5  | 0 | 1281.10277 | 0.00059  | .00100 | 0.00059  | 0.50 |
| 1848: | 12 | 12 | 0  | 1 | 11 | 11 | 1  | 0 | 1280.15885 | 0.00036  | .00100 | 0.00036  | 0.50 |
| 1849: | 12 | 12 | 1  | 1 | 11 | 11 | 0  | 0 | 1280.15885 | 0.00036  | .00100 | 0.00036  | 0.50 |
| 1850: | 13 | 12 | 1  | 1 | 12 | 11 | 2  | 0 | 1280.58551 | 0.00084  | .00100 | 0.00084  | 0.50 |
| 1851: | 13 | 12 | 2  | 1 | 12 | 11 | 1  | 0 | 1280.58551 | 0.00084  | .00100 | 0.00084  | 0.50 |
| 1852: | 14 | 12 | 2  | 1 | 13 | 11 | 3  | 0 | 1281.01196 | 0.00081  | .00100 | 0.00081  | 0.50 |
| 1853: | 14 | 12 | 3  | 1 | 13 | 11 | 2  | 0 | 1281.01196 | 0.00081  | .00100 | 0.00081  | 0.50 |
| 1854: | 15 | 12 | 3  | 1 | 14 | 11 | 4  | 0 | 1281.43823 | 0.00032  | .00100 | 0.00032  | 0.50 |
| 1855: | 15 | 12 | 4  | 1 | 14 | 11 | 3  | 0 | 1281.43823 | 0.00032  | .00100 | 0.00032  | 0.50 |
| 1856: | 16 | 12 | 4  | 1 | 15 | 11 | 5  | 0 | 1281.86530 | 0.00036  | .00100 | 0.00036  | 0.50 |
| 1857: | 16 | 12 | 5  | 1 | 15 | 11 | 4  | 0 | 1281.86530 | 0.00036  | .00100 | 0.00036  | 0.50 |
| 1858: | 13 | 13 | 0  | 1 | 12 | 12 | 1  | 0 | 1281.34534 | 0.00001  | .00100 | 0.00001  | 0.50 |
| 1859: | 13 | 13 | 1  | 1 | 12 | 12 | 0  | 0 | 1281.34534 | 0.00001  | .00100 | 0.00001  | 0.50 |
| 1860: | 14 | 13 | 1  | 1 | 13 | 12 | 2  | 0 | 1281.77265 | 0.00083  | .00100 | 0.00083  | 0.50 |
| 1861: | 14 | 13 | 2  | 1 | 13 | 12 | 1  | 0 | 1281.77265 | 0.00083  | .00100 | 0.00083  | 0.50 |
| 1862: | 11 | 2  | 9  | 1 | 11 | 3  | 8  | 0 | 1264.59140 | 0.00143  | .00100 | 0.00114  | 0.55 |
| 1863: | 8  | 1  | 8  | 1 | 8  | 2  | 7  | 0 | 1264.59140 | 0.00078  | .00100 | 0.00114  | 0.45 |
| 1864: | 17 | 2  | 15 | 1 | 17 | 3  | 14 | 0 | 1264.69008 | 0.00136  | .00100 | 0.00102  | 0.52 |
| 1865: | 7  | 1  | 7  | 1 | 7  | 2  | 6  | 0 | 1264.69008 | 0.00065  | .00100 | 0.00102  | 0.48 |



|       |    |   |   |   |    |   |   |   |            |          |        |          |      |
|-------|----|---|---|---|----|---|---|---|------------|----------|--------|----------|------|
| 1866: | 4  | 1 | 4 | 1 | 3  | 0 | 3 | 0 | 1268.16136 | -0.00090 | .00100 | -0.00114 | 0.54 |
| 1867: | 5  | 3 | 3 | 1 | 5  | 2 | 4 | 0 | 1268.16136 | -0.00143 | .00100 | -0.00114 | 0.46 |
| 1868: | 7  | 1 | 6 | 1 | 6  | 2 | 5 | 0 | 1268.30184 | 0.00047  | .00100 | 0.00013  | 0.44 |
| 1869: | 10 | 3 | 8 | 1 | 10 | 2 | 9 | 0 | 1268.30184 | -0.00015 | .00100 | 0.00013  | 0.56 |
| 1870: | 4  | 3 | 2 | 1 | 3  | 2 | 1 | 0 | 1269.83344 | -0.00051 | .00100 | -0.00060 | 0.60 |
| 1871: | 4  | 3 | 1 | 1 | 3  | 2 | 1 | 0 | 1269.83344 | -0.00074 | .00100 | -0.00060 | 0.40 |
| 1872: | 4  | 3 | 2 | 1 | 3  | 2 | 2 | 0 | 1269.83913 | -0.00051 | .00100 | -0.00064 | 0.40 |
| 1873: | 4  | 3 | 1 | 1 | 3  | 2 | 2 | 0 | 1269.83913 | -0.00074 | .00100 | -0.00064 | 0.60 |
| 1874: | 7  | 2 | 6 | 1 | 6  | 1 | 5 | 0 | 1270.07604 | 0.00061  | .00100 | 0.00034  | 0.58 |
| 1875: | 9  | 1 | 8 | 1 | 8  | 1 | 7 | 0 | 1270.07604 | -0.00004 | .00100 | 0.00034  | 0.42 |
| 1876: | 9  | 2 | 7 | 1 | 9  | 1 | 8 | 0 | 1267.20472 | -0.00035 | .00100 | -0.00152 | 0.50 |
| 1877: | 6  | 2 | 4 | 1 | 6  | 1 | 5 | 0 | 1267.20472 | -0.00271 | .00100 | -0.00152 | 0.50 |

PARAMETERS IN FIT (values truncated and Nlines statistics):

|       |     |      |               |    |
|-------|-----|------|---------------|----|
| 10000 | A   | /MHz | [18023.84821] | 1  |
| 20000 | B   | /MHz | [6682.15013]  | 2  |
| 30000 | C   | /MHz | [5951.39761]  | 3  |
| 200   | DJ  | /kHz | [ 2.915]      | 4  |
| 1100  | DJK | /kHz | [ 3.46744]    | 5  |
| 2000  | DK  | /kHz | [19.73597]    | 6  |
| 40100 | dJ  | /kHz | [ 0.19283]    | 7  |
| 41000 | dK  | /kHz | [ 2.59503]    | 8  |
| 300   | HJ  | /Hz  | [ 0.00158]    | 9  |
| 1200  | HJK | /Hz  | [-0.00754]    | 10 |
| 2100  | HKJ | /Hz  | [ 0.03087]    | 11 |
| 3000  | HK  | /Hz  | [ 0.03837]    | 12 |
| 40200 | hJ  | /Hz  | [ 0.0000897]  | 13 |
| 41100 | hJK | /Hz  | [ 0.]         | 14 |
| 42000 | hK  | /Hz  | [ 0.11567]    | 15 |

|       |     |      |                |    |
|-------|-----|------|----------------|----|
| 11    | nu1 | /MHz | 37959763.8(40) | 16 |
| 10011 | A   | /MHz | 18008.165(75)  | 17 |
| 20011 | B   | /MHz | 6685.117(64)   | 18 |
| 30011 | C   | /MHz | 5959.310(44)   | 19 |
| 211   | DJ  | /kHz | 2.970(14)      | 20 |
| 1111  | DJK | /kHz | 3.14(12)       | 21 |
| 2011  | DK  | /kHz | 24.45(33)      | 22 |
| 40111 | dJ  | /kHz | 0.183(12)      | 23 |
| 41011 | dK  | /kHz | [ 2.59503]     | 24 |
| 311   | HJ  | /Hz  | [ 0.00158]     | 25 |
| 1211  | HJK | /Hz  | [-0.00754]     | 26 |
| 2111  | HKJ | /Hz  | [ 0.03087]     | 27 |
| 3011  | HK  | /Hz  | [ 0.03837]     | 28 |
| 40211 | hJ  | /Hz  | [ 0.0000897]   | 29 |
| 41111 | hJK | /Hz  | [ 0.]          | 30 |
| 42011 | hK  | /Hz  | [ 0.11567]     | 31 |

MICROWAVE AVG = 0.000000 MHz, IR AVG = -0.00009  
MICROWAVE RMS = 0.000000 MHz, IR RMS = 0.00224  
END OF ITERATION 1 OLD, NEW RMS ERROR= 0.66692 0.66692

distinct frequency lines in fit: 499  
distinct parameters of fit: 8

| INFRARED waven. range | lines fitted | lines   | lines   | RMS    | RMS ERROR | J range   | Ka range          |
|-----------------------|--------------|---------|---------|--------|-----------|-----------|-------------------|
| total                 | dv=0         | dv.ne.0 | UNFITTD | e<-0.9 |           |           |                   |
| 1<- 0                 | 499          | 0       | 499     | 0      | 0         | 0.0022364 | 0.66686 1 55 0 21 |
| 1264.59 1299.95       |              |         |         |        |           |           |                   |
| total:                | 499          | 0       | 499     | 0      | 0         | 0.0022364 | 0.66686           |

NOTE: the RMS values above are for Nlines statistics, but the 'total' values may differ slightly from those in the .FIT file since the o-c values for this evaluation are as rounded in the .FIT.

PARAMETERS IN FIT WITH STANDARD ERRORS ON THOSE THAT ARE FITTED:  
(values rounded and degrees of freedom, Ndegf=Nlines-Nconst, statistics)

|       |     |      |               |   |
|-------|-----|------|---------------|---|
| 10000 | A   | /MHz | [18023.84821] | 1 |
| 20000 | B   | /MHz | [6682.15013]  | 2 |
| 30000 | C   | /MHz | [5951.39761]  | 3 |
| 200   | DJ  | /kHz | [ 2.915]      | 4 |
| 1100  | DJK | /kHz | [ 3.46744]    | 5 |

|       |     |      |                 |    |
|-------|-----|------|-----------------|----|
| 2000  | DK  | /kHz | [19.73597]      | 6  |
| 40100 | dJ  | /kHz | [ 0.19283]      | 7  |
| 41000 | dK  | /kHz | [ 2.59503]      | 8  |
| 300   | HJ  | /Hz  | [ 0.00158]      | 9  |
| 1200  | HJK | /Hz  | [-0.00754]      | 10 |
| 2100  | HKJ | /Hz  | [ 0.03087]      | 11 |
| 3000  | HK  | /Hz  | [ 0.03837]      | 12 |
| 40200 | hJ  | /Hz  | [ 0.0000897]    | 13 |
| 41100 | hJK | /Hz  | [ 0.]           | 14 |
| 42000 | hK  | /Hz  | [ 0.11567]      | 15 |
| 11    | nu1 | /MHz | 37959763.8 (27) | 16 |
| 10011 | A   | /MHz | 18008.165 (50)  | 17 |
| 20011 | B   | /MHz | 6685.117 (43)   | 18 |
| 30011 | C   | /MHz | 5959.310 (30)   | 19 |
| 211   | DJ  | /kHz | 2.9704 (96)     | 20 |
| 1111  | DJK | /kHz | 3.145 (79)      | 21 |
| 2011  | DK  | /kHz | 24.45 (22)      | 22 |
| 40111 | dJ  | /kHz | 0.1834 (83)     | 23 |
| 41011 | dK  | /kHz | [ 2.59503]      | 24 |
| 311   | HJ  | /Hz  | [ 0.00158]      | 25 |
| 1211  | HJK | /Hz  | [-0.00754]      | 26 |
| 2111  | HKJ | /Hz  | [ 0.03087]      | 27 |
| 3011  | HK  | /Hz  | [ 0.03837]      | 28 |
| 40211 | hJ  | /Hz  | [ 0.0000897]    | 29 |
| 41111 | hJK | /Hz  | [ 0.]           | 30 |
| 42011 | hK  | /Hz  | [ 0.11567]      | 31 |

CORRELATION COEFFICIENTS, C.ij:

|      | nu1     | A       | B       | C       | -DJ     | -DJK    | -DK    | -dJ    |
|------|---------|---------|---------|---------|---------|---------|--------|--------|
| nu1  | 1.0000  |         |         |         |         |         |        |        |
| A    | -0.4363 | 1.0000  |         |         |         |         |        |        |
| B    | -0.2739 | -0.2558 | 1.0000  |         |         |         |        |        |
| C    | -0.1922 | 0.1013  | -0.5793 | 1.0000  |         |         |        |        |
| -DJ  | 0.3327  | 0.0413  | -0.5024 | -0.0670 | 1.0000  |         |        |        |
| -DJK | 0.1080  | 0.1358  | -0.1406 | -0.0404 | -0.5312 | 1.0000  |        |        |
| -DK  | 0.1333  | -0.6744 | 0.2341  | -0.0237 | 0.3010  | -0.7629 | 1.0000 |        |
| -dJ  | 0.0806  | 0.0770  | -0.7479 | 0.7251  | 0.5986  | -0.4077 | 0.2101 | 1.0000 |

Mean value of |C.ij|, i.ne.j = 0.3112  
Mean value of C.ij, i.ne.j = -0.0913

No correlations with absolute value greater than 0.9950

Worst fitted lines (obs-calc/error):

|                  |            |            |                               |
|------------------|------------|------------|-------------------------------|
| 1661: -2.8       | 65: 2.2    | 9: 2.1     | 1746: 1.9                     |
| 1622: 1.8        | 1675: 1.8  | 1649: 1.8  | 1691: -1.8                    |
| 1644: 1.7        | 1: 1.7     | 975: 1.7   | 5: 1.7                        |
| 1770: 1.7        | 1692: -1.6 | 1142: -1.6 | 1614: 1.6                     |
| 1665: -1.6       | 1687: -1.6 | 1645: 1.5  | 1876: 1.5                     |
| 1662: -1.5       | 1146: -1.5 | 135: 1.5   | 1742: 1.5                     |
| 1170: -1.4       | 967: 1.3   | 37: -1.3   | 1110: 1.3                     |
| 1010: 1.3        | 49: -1.3   | 1639: 1.3  | 1491: -1.3                    |
| 29: -1.3         | 1646: 1.3  | 887: 1.3   | 903: 1.3                      |
| 163: 1.2         | 1674: -1.2 | 259: -1.2  | 1677: 1.2                     |
| 1684: -1.2       | 343: -1.2  | 13: 1.2    | 1028: -1.2                    |
| 1676: -1.2       | 971: 1.2   | 1866: 1.1  | 111: 1.1                      |
| 1862: -1.1       | 1768: 1.1  |            |                               |
| 1661: 14 0 14 1  | 14 1 14 0  | 1266.23855 | 0.00283 .00100                |
| 65: 36 1 35 1    | 35 2 34 0  | 1281.06898 | -0.00887 .00400 -0.00896 0.33 |
| 9: 29 0 29 1     | 28 1 28 0  | 1278.01336 | -0.00821 .00400 -0.00825 0.34 |
| 1746: 14 6 9 1   | 13 5 8 0   | 1276.39988 | -0.00148 .00100 -0.00188 0.50 |
| 1622: 47 19 28 1 | 47 18 29 0 | 1280.65764 | -0.00731 .00400 -0.00734 0.11 |
| 1675: 3 2 1 1    | 2 1 2 0    | 1268.67686 | -0.00183 .00100               |
| 1649: 5 1 5 1    | 4 0 4 0    | 1268.52982 | -0.00177 .00100               |
| 1691: 12 1 11 1  | 11 2 10 0  | 1270.83040 | 0.00177 .00100                |
| 1644: 1 1 0 1    | 1 0 1 0    | 1266.60196 | -0.00174 .00100               |
| 1: 26 0 26 1     | 25 1 25 0  | 1276.78352 | -0.00681 .00400 -0.00693 0.34 |
